# Supplementary material
Source: publisher figshare collection journal article supplement (https://acs.figshare.com/ndownloader/files/9103582)
Supplement: Supplementary file 1 [file 9103582]

# Supporting Information

## Copper-Assisted Oxidative Trifluoromethylthiolation of 2,3-Allenoic Acids with AgSCF<sub>3</sub>

Shen Pan, Yangen Huang, Xiu-Hua Xu, and Feng-Ling Qing

### Contents

|                                                                                                     |    |
|-----------------------------------------------------------------------------------------------------|----|
| 1. General Remarks.....                                                                             | 2  |
| 2. Preparation of 2,3-Allenoic Acids .....                                                          | 2  |
| 3. Optimization of Reaction Conditions.....                                                         | 6  |
| 4. Cyclic Oxytrifluoromethylthiolation of 2,3-Allenoic Acids with AgSCF <sub>3</sub> .....          | 8  |
| 5. Bis-Trifluoromethylthiolation of 2,3-Allenoic Acids with AgSCF <sub>3</sub> .....                | 15 |
| 6. Transformation of Compound 3.....                                                                | 18 |
| 7. Mechanistic Investigation. ....                                                                  | 19 |
| 8. Copies of <sup>1</sup> H, <sup>19</sup> F, and <sup>13</sup> C NMR Spectra for the Products..... | 21 |
| 9. ORTEP Drawing of the X-Ray Crystallographic Structure of 3f .....                                | 67 |

## 1. General Remarks

$^1\text{H}$  and  $^{19}\text{F}$  NMR ( $\text{CFCl}_3$  as external standard and low field is positive) spectra were recorded on a Bruker AM 400 spectrometer or 600 spectrometer.  $^{13}\text{C}$  NMR spectra were recorded on a Bruker AM 400 spectrometer or Bruker AM 600 spectrometer. Chemical shifts ( $\delta$ ) were reported in ppm, and coupling constants ( $J$ ) were in Hertz (Hz). The following abbreviations were used to explain the multiplicities: s = singlet, d = doublet, t = triplet, q = quartet, m = multiplet, br = broad. The NMR yield was determined by  $^{19}\text{F}$  NMR using (trifluoromethyl)benzene as an internal standard before working up the reaction. High resolution mass spectra (HRMS) were performed using a GC/MS TOF high-resolution mass spectrometer equipped with a liquid chromatography system or as electron spray ionization using a Thermo Fischer Scientific LTQ FT Ultra instrument in DART-positive mode.

**Materials:** Unless otherwise noted, all reagents were obtained commercially and used without further purification.  $\text{CH}_3\text{CN}$  was distilled from  $\text{CaH}_2$  and stored with 4 Å molecular sieves. Reactions were performed under an atmosphere of  $\text{N}_2$  using glassware that was flame-dried under vacuum.  $\text{AgSCF}_3$  was prepared following the literature<sup>1</sup>.

## 2. Preparation of 2,3-Allenoic Acids

The 2,3-allenoic acids **1a-1c**,<sup>2</sup> **1f-1h**,<sup>2</sup> **1m**,<sup>2</sup> **1n-1q**,<sup>3</sup> **1r-1t**,<sup>4</sup> **1v**,<sup>5</sup> and **1w**<sup>6</sup> were prepared in accordance with methods described in the references.

### General methods for preparation of 2,3-allenoic acids (**1d**, **1e**, **1i-1l**)<sup>2</sup>

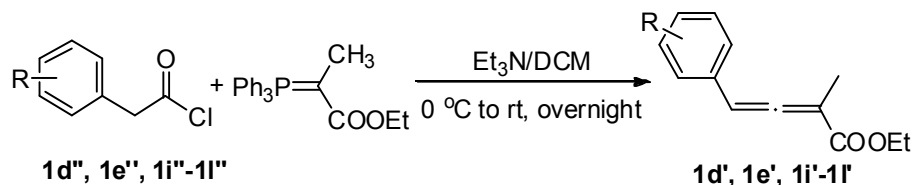

**Typical Procedure.** The mixture of ethyl 2-(triphenylphosphoranylidenemethyl)propanoate (2.90 g, 8 mmol, 1.0 equiv) and  $\text{Et}_3\text{N}$  (0.81 g, 8 mmol, 1.0 equiv) in DCM (80 mL) was stirred at  $0\text{ }^\circ\text{C}$  for 20 minutes. Then, a solution of **1d''**, **1e''**, **1i''-1l''** (10 mmol, 1.25 equiv) in DCM (15 mL) was added dropwise and the reaction mixture was stirred at room temperature overnight. The reaction mixture was diluted with  $\text{EtOAc}$ , and extracted with saturated aqueous  $\text{NaCl}$  solution, and extracted with  $\text{EtOAc}$ . The combined organic layers were dried with  $\text{Na}_2\text{SO}_4$ , filtered, and the solvent was removed under reduced pressure. The resulting crude product was purified by flash chromatography on silica gel ( $\text{PE}/\text{EA} = 20:1$ ) to give **1d'**, **1e'**, **1i'-1l'**.

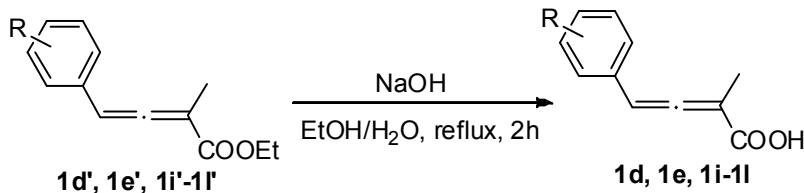

**Typical Procedure.** To a round-bottom flask, **1d'**, **1e'**, **1i'-1l'** (5 mmol, 1.0 equiv), EtOH (15 mL), H<sub>2</sub>O (15 mL), and NaOH (0.3 g, 7.5 mmol, 1.5 equiv) were added sequentially and the resulting solution was heated to reflux. After 2 h, the reaction was completed as monitored by TLC. The reaction mixture was diluted with EtOAc, and extracted with saturated aqueous NaHCO<sub>3</sub> solution. The aqueous layer was separated, acidified to pH 2.0 by addition of HCl (1 N), and extracted with DCM. The combined organic layers were dried with Na<sub>2</sub>SO<sub>4</sub>, filtered, and the solvent was removed under reduced pressure. The resulting crude product was purified by flash chromatography on silica gel (PE/EA = 5:1 with HOAc (1 %, v/v)) to give **1d**, **1e**, **1i-1l**.

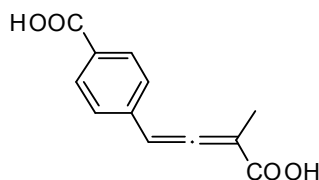

#### 4-(3-Carboxybuta-1,2-dien-1-yl)benzoic acid (**1d**)

Compound **1d** was obtained as a white solid (228.2 mg, 21%), PE/EA = 5:1 with HOAc (1 %, v/v) as eluent for the column chromatography. Mp 188-190 °C. <sup>1</sup>H NMR (600 MHz, DMSO) δ 12.83 (s, 2H), 7.93 (d, *J* = 8.4 Hz, 2H), 7.41 (d, *J* = 8.4 Hz, 2H), 6.82 (q, *J* = 2.9 Hz, 1H), 1.91 (d, *J* = 3.0 Hz, 3H). <sup>13</sup>C NMR (151 MHz, DMSO) δ 212.9, 167.9, 167.5, 137.7, 130.4, 130.1, 127.6, 99.7, 96.4, 15.2. MS (ESI) *m/z*: 219 [M+H]<sup>+</sup>. HRMS (ESI) *m/z*: Calcd for C<sub>12</sub>H<sub>11</sub>O<sub>4</sub> 219.0652; found [M+H]<sup>+</sup>: 219.0651.

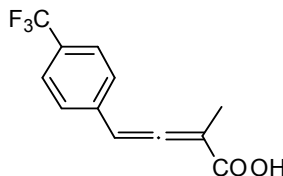

#### 2-Methyl-4-(4-(trifluoromethyl)phenyl)buta-2,3-dienoic acid (**1e**)

Compound **1e** was obtained as a white solid (678.8 mg, 56%), PE/EA = 5:1 with HOAc (1 %, v/v) as eluent for the column chromatography. Mp 123-125 °C. <sup>1</sup>H NMR (400 MHz, CDCl<sub>3</sub>) δ 11.24 (s, 1H), 7.50 (d, *J* = 8.2 Hz, 2H), 7.31 (d, *J* = 8.1 Hz, 2H), 6.49 (q, *J* = 2.7 Hz, 1H), 1.93 (d, *J* = 2.9 Hz, 3H). <sup>19</sup>F NMR (377 MHz, CDCl<sub>3</sub>) δ -62.6 (s, 3F). <sup>13</sup>C NMR (101 MHz, CDCl<sub>3</sub>) δ 214.1, 172.2, 135.8, 129.9 (q, *J* = 32.5 Hz), 127.6, 125.8 (q, *J* = 7.6 Hz), 124.0 (q, *J* = 273.8 Hz), 99.6, 96.9, 14.5. MS (ESI) *m/z*: 243 [M+H]<sup>+</sup>. HRMS (ESI) *m/z*: Calcd for C<sub>12</sub>H<sub>10</sub>F<sub>3</sub>O<sub>2</sub> 243.0627; found [M+H]<sup>+</sup>: 243.0626.

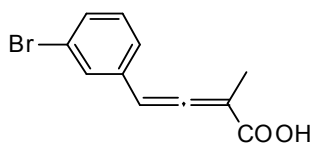

**4-(3-Bromophenyl)-2-methylbuta-2,3-dienoic acid (1i)**

Compound **1i** was obtained as a white solid (810.1 mg, 64%), PE/EA = 5:1 with HOAc (1 %, v/v) as eluent for the column chromatography. Mp 103-105 °C.  $^1\text{H}$  NMR (600 MHz,  $\text{CDCl}_3$ )  $\delta$  11.56 (s, 1H), 7.45 (d,  $J$  = 1.4 Hz, 1H), 7.42-7.39 (m, 1H), 7.25-7.21 (m, 2H), 6.51 (q,  $J$  = 2.9 Hz, 1H), 2.03 (d,  $J$  = 3.0 Hz, 3H).  $^{13}\text{C}$  NMR (151 MHz,  $\text{CDCl}_3$ )  $\delta$  213.7, 172.4, 134.1, 130.9, 130.3, 130.2, 126.1, 123.0, 99.6, 96.7, 14.7. MS (ESI)  $m/z$ : 253  $[\text{M}+\text{H}]^+$ . HRMS (ESI)  $m/z$ : Calcd for  $\text{C}_{11}\text{H}_9\text{BrO}_2$  252.9859, found  $[\text{M}+\text{H}]^+$ : 252.9856.

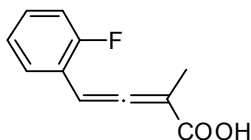

**4-(2-Fluorophenyl)-2-methylbuta-2,3-dienoic acid (1j)**

Compound **1j** was obtained as a white solid (729.3 mg, 76%), PE/EA = 5:1 with HOAc (1 %, v/v) as eluent for the column chromatography. Mp 107-109 °C.  $^1\text{H}$  NMR (400 MHz,  $\text{CDCl}_3$ )  $\delta$  11.61 (s, 1H), 7.25-7.21 (m, 1H), 7.19-7.10 (m, 1H), 7.03-6.94 (m, 2H), 6.65 (q,  $J$  = 2.8 Hz, 1H), 1.91 (d,  $J$  = 3.0 Hz, 3H).  $^{19}\text{F}$  NMR (377 MHz,  $\text{CDCl}_3$ )  $\delta$  -117.2--117.4 (m, 1F).  $^{13}\text{C}$  NMR (101 MHz,  $\text{CDCl}_3$ )  $\delta$  213.2, 171.6, 158.8 (d,  $J$  = 251.5 Hz), 128.4 (d,  $J$  = 8.1 Hz), 128.0 (d,  $J$  = 3.0 Hz), 123.3 (d,  $J$  = 3.0 Hz), 118.5, 114.8 (d,  $J$  = 21.2 Hz), 97.9, 89.5 (d,  $J$  = 6.1 Hz), 13.6. MS (ESI)  $m/z$ : 193  $[\text{M}+\text{H}]^+$ . HRMS (ESI)  $m/z$ : Calcd for  $\text{C}_{11}\text{H}_{10}\text{FO}_2$  193.0659; found  $[\text{M}+\text{H}]^+$ : 193.0659.

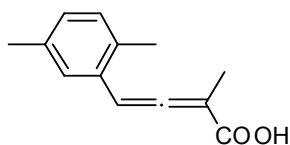

**4-(2,5-Dimethylphenyl)-2-methylbuta-2,3-dienoic acid (1k)**

Compound **1k** was obtained as a white solid (858.7 mg, 85%), PE/EA = 5:1 with HOAc (1 %, v/v) as eluent for the column chromatography. Mp 126-128 °C.  $^1\text{H}$  NMR (600 MHz,  $\text{CDCl}_3$ )  $\delta$  11.17 (s, 1H), 7.13 (s, 1H), 7.10 (d,  $J$  = 7.7 Hz, 1H), 7.02 (d,  $J$  = 7.7 Hz, 1H), 6.73 (q,  $J$  = 3.0 Hz, 1H), 2.37 (s, 3H), 2.34 (s, 3H), 2.03 (d,  $J$  = 3.0 Hz, 3H).  $^{13}\text{C}$  NMR (151 MHz,  $\text{CDCl}_3$ )  $\delta$  214.2, 173.0, 135.8, 132.8, 130.7, 130.0, 128.8, 97.9, 95.4, 20.9, 19.6, 15.0. MS (ESI)  $m/z$ : 203  $[\text{M}+\text{H}]^+$ . HRMS (ESI)  $m/z$ : Calcd for  $\text{C}_{13}\text{H}_{15}\text{O}_2$  203.1067; found  $[\text{M}+\text{H}]^+$ : 203.1066.

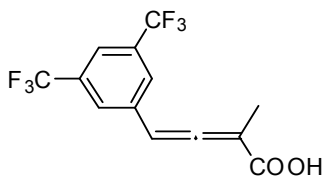

#### 4-(3,5-Bis(trifluoromethyl)phenyl)-2-methylbuta-2,3-dienoic acid (**11**)

Compound **11** was obtained as a white solid (434.1 mg, 28%), PE/EA = 5:1 with HOAc (1 %, v/v) as eluent for the column chromatography. Mp 147-149 °C. <sup>1</sup>H NMR (400 MHz, CDCl<sub>3</sub>) δ 10.89 (s, 1H), 7.68 (s, 1H), 7.61 (s, 2H), 6.55 (q, *J* = 2.8 Hz, 1H), 1.97 (d, *J* = 3.0 Hz, 3H). <sup>19</sup>F NMR (377 MHz, CDCl<sub>3</sub>) δ -63.0 (s, 6F). <sup>13</sup>C NMR (101 MHz, CDCl<sub>3</sub>) δ 212.7, 170.6, 133.6, 131.3 (q, *J* = 33.5 Hz), 126.1 (q, *J* = 3.7 Hz), 122.1 (q, *J* = 271.8 Hz), 120.5 (q, *J* = 3.8 Hz), 99.6, 95.1, 13.5. MS (ESI) *m/z*: 311 [M+H]<sup>+</sup>. HRMS (ESI) *m/z*: Calcd for C<sub>13</sub>H<sub>9</sub>F<sub>6</sub>O<sub>2</sub> 311.0501; found [M+H]<sup>+</sup>: 311.0499.

#### Preparation of 5-phenyl-2-vinylidenepentanoic acid (**1u**)<sup>4</sup>

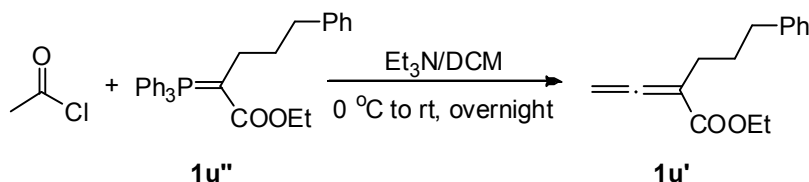

The mixture of **1u''** (3.73 g, 8 mmol, 1.0 equiv) and Et<sub>3</sub>N (0.81 g, 8 mmol, 1.0 equiv) in DCM (80 mL) was stirred 0 °C 20 minutes. Then, a solution of acetyl chloride (0.79 g, 10 mmol, 1.25 equiv) in DCM (15 mL) was added dropwise and the reaction mixture was stirred at room temperature overnight. The reaction mixture was diluted with EtOAc, and extracted with saturated aqueous NaCl solution, and extracted with EtOAc. The combined organic layers were dried with Na<sub>2</sub>SO<sub>4</sub>, filtered, and the solvent was removed under reduced pressure. The resulting crude product was purified by flash chromatography on silica gel (PE/EA = 20:1) to give **1u'** (1.58 g, 86% yield).

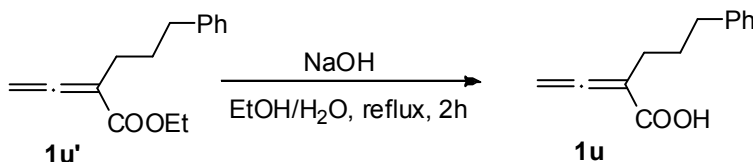

To a round-bottom flask, **1u'** (1.15 g, 5 mmol, 1.0 equiv), EtOH (15 mL), H<sub>2</sub>O (15 mL), and NaOH (0.3 g, 7.5 mmol, 1.5 equiv) were added sequentially and the resulting solution was heated to reflux. After 2 h, the reaction was completed as monitored by TLC. The reaction mixture was diluted with EtOAc, and extracted with saturated aqueous NaHCO<sub>3</sub> solution. The aqueous layer was separated, acidified to pH 2.0 by addition of HCl (1 N), and extracted with DCM. The combined organic layers were dried with Na<sub>2</sub>SO<sub>4</sub>, filtered, and the solvent was removed under reduced pressure. The resulting crude product was purified by flash chromatography on silica gel (PE/EA = 5:1 with HOAc (1 %, v/v)) to give **1u** as a white solid (678.8 mg, 67% yield). Mp 67-69 °C. <sup>1</sup>H NMR (400 MHz, CDCl<sub>3</sub>) δ 11.36 (s, 1H), 7.18-7.23 (m, 2H),

7.10-7.13 (m, 3H), 5.14 (t,  $J = 3.0$  Hz, 2H), 2.62-2.55 (m, 2H), 2.30-2.09 (m, 2H), 1.82-1.65 (m, 2H).  $^{13}\text{C}$  NMR (101 MHz,  $\text{CDCl}_3$ )  $\delta$  214.8, 172.8, 142.0, 128.5, 128.4, 125.8, 99.8, 79.6, 35.3, 29.6, 27.3. MS (ESI)  $m/z$ : 203  $[\text{M}+\text{H}]^+$ . HRMS (ESI)  $m/z$ : Calcd for  $\text{C}_{13}\text{H}_{15}\text{O}_2$  203.1067; found  $[\text{M}+\text{H}]^+$ : 203.1066.

## References:

1. Teverovskiy, G.; Surry, D.; Buchwald, S. *Angew. Chem., Int. Ed.* **2011**, *50*, 7312.
2. Chai, G.; Lu, Z.; Fu, C.; Ma, S. *Adv. Synth. Catal.* **2009**, *351*, 1946.
3. Ramaswamy, S.; Hui, R. A.; Jones, J. B. *J. Chem. Soc., Chem. Commun.* **1986**, 1545.
4. Castellano, S.; Fiji, H. G.; Kinderman, S.; Watanabe, M.; Leon, P.; Tamanoi, F.; Kwon, O. *J. Am. Chem. Soc.* **2007**, *129*, 5843.
5. Miao, B.; Li, G.; Ma, S. *Chem. Eur. J.* **2015**, *21*, 17224.
6. Noqi, K.; Fujihara, T.; Terao, J.; Tsuji, Y. *Chem. Commun.* **2014**, *50*, 13052.

## 3. Optimization of Reaction Conditions

### Optimization of reaction conditions for cyclic oxytrifluoromethylthiolation <sup>a</sup>

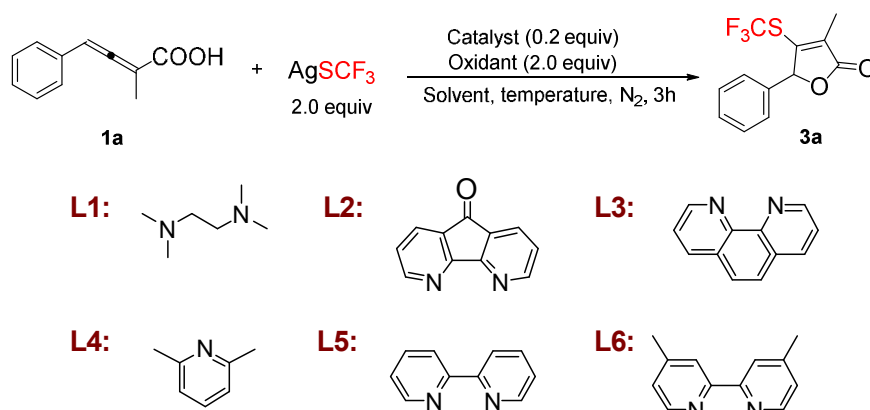

| Entry | Catalyst | Oxidant                                                      | Solvent (x:y)                                   | Tem (°C) | Yield (%) <sup>b</sup> |
|-------|----------|--------------------------------------------------------------|-------------------------------------------------|----------|------------------------|
| 1     | ---      | ( $\text{NH}_4$ ) <sub>2</sub> S <sub>2</sub> O <sub>8</sub> | $\text{CH}_3\text{CN}$                          | 70       | 22                     |
| 2     | ---      | ( $\text{NH}_4$ ) <sub>2</sub> S <sub>2</sub> O <sub>8</sub> | DMF                                             | 70       | Trace                  |
| 3     | ---      | ( $\text{NH}_4$ ) <sub>2</sub> S <sub>2</sub> O <sub>8</sub> | THF                                             | 70       | NR                     |
| 4     | ---      | ( $\text{NH}_4$ ) <sub>2</sub> S <sub>2</sub> O <sub>8</sub> | $\text{CH}_3\text{CN}/\text{H}_2\text{O}$ (1:1) | 70       | 7                      |
| 5     | ---      | ( $\text{NH}_4$ ) <sub>2</sub> S <sub>2</sub> O <sub>8</sub> | $\text{CH}_3\text{CN}/\text{TFA}$ (1:1)         | 70       | NR                     |
| 6     | ---      | ( $\text{NH}_4$ ) <sub>2</sub> S <sub>2</sub> O <sub>8</sub> | $\text{CH}_3\text{CN}/\text{TfOH}$ (1:1)        | 70       | NR                     |
| 7     | ---      | ( $\text{NH}_4$ ) <sub>2</sub> S <sub>2</sub> O <sub>8</sub> | $\text{CH}_3\text{CN}/\text{HCOOH}$ (1:1)       | 70       | 15                     |
| 8     | ---      | ( $\text{NH}_4$ ) <sub>2</sub> S <sub>2</sub> O <sub>8</sub> | $\text{CH}_3\text{CN}/\text{HOAc}$ (1:1)        | 70       | 38                     |
| 9     | ---      | ( $\text{NH}_4$ ) <sub>2</sub> S <sub>2</sub> O <sub>8</sub> | $\text{CH}_3\text{CN}/\text{HOAc}$ (2:1)        | 70       | 60                     |
| 10    | ---      | ( $\text{NH}_4$ ) <sub>2</sub> S <sub>2</sub> O <sub>8</sub> | $\text{CH}_3\text{CN}/\text{HOAc}$ (1:2)        | 70       | 6                      |
| 11    | ---      | ( $\text{NH}_4$ ) <sub>2</sub> S <sub>2</sub> O <sub>8</sub> | $\text{CH}_3\text{CN}/\text{HOAc}$ (4:1)        | 70       | 65                     |
| 12    | ---      | ( $\text{NH}_4$ ) <sub>2</sub> S <sub>2</sub> O <sub>8</sub> | $\text{CH}_3\text{CN}/\text{HOAc}$ (8:1)        | 70       | 58                     |

|                 |                      |                                                               |                                     |           |           |
|-----------------|----------------------|---------------------------------------------------------------|-------------------------------------|-----------|-----------|
| 13              | ---                  | (NH <sub>4</sub> ) <sub>2</sub> S <sub>2</sub> O <sub>8</sub> | THF / HOAc (4:1)                    | 70        | NR        |
| 14              | ---                  | (NH <sub>4</sub> ) <sub>2</sub> S <sub>2</sub> O <sub>8</sub> | DCE / HOAc (4:1)                    | 70        | NR        |
| 15              | ---                  | (NH <sub>4</sub> ) <sub>2</sub> S <sub>2</sub> O <sub>8</sub> | toluene / HOAc (4:1)                | 70        | NR        |
| 16              | CuSO <sub>4</sub>    | (NH <sub>4</sub> ) <sub>2</sub> S <sub>2</sub> O <sub>8</sub> | CH <sub>3</sub> CN /HOAc (4:1)      | 70        | 68        |
| 17              | CuTC                 | (NH <sub>4</sub> ) <sub>2</sub> S <sub>2</sub> O <sub>8</sub> | CH <sub>3</sub> CN /HOAc (4:1)      | 70        | 76        |
| 18              | Cu(OAc) <sub>2</sub> | (NH <sub>4</sub> ) <sub>2</sub> S <sub>2</sub> O <sub>8</sub> | CH <sub>3</sub> CN /HOAc (4:1)      | 70        | 77        |
| 19              | Cu(OTf) <sub>2</sub> | (NH <sub>4</sub> ) <sub>2</sub> S <sub>2</sub> O <sub>8</sub> | CH <sub>3</sub> CN /HOAc (4:1)      | 70        | 71        |
| 20              | CuI                  | (NH <sub>4</sub> ) <sub>2</sub> S <sub>2</sub> O <sub>8</sub> | CH <sub>3</sub> CN /HOAc (4:1)      | 70        | 67        |
| 21              | Cu                   | (NH <sub>4</sub> ) <sub>2</sub> S <sub>2</sub> O <sub>8</sub> | CH <sub>3</sub> CN /HOAc (4:1)      | 70        | 70        |
| 22              | <b>CuCN</b>          | <b>(NH<sub>4</sub>)<sub>2</sub>S<sub>2</sub>O<sub>8</sub></b> | <b>CH<sub>3</sub>CN /HOAc (4:1)</b> | <b>70</b> | <b>85</b> |
| 23              | CuCN                 | (NH <sub>4</sub> ) <sub>2</sub> S <sub>2</sub> O <sub>8</sub> | CH <sub>3</sub> CN /HOAc (4:1)      | 50        | 36        |
| 24              | CuCN                 | (NH <sub>4</sub> ) <sub>2</sub> S <sub>2</sub> O <sub>8</sub> | CH <sub>3</sub> CN /HOAc (4:1)      | 90        | 75        |
| 25              | CuCN                 | K <sub>2</sub> S <sub>2</sub> O <sub>8</sub>                  | CH <sub>3</sub> CN /HOAc (4:1)      | 70        | 48        |
| 26              | CuCN                 | Na <sub>2</sub> S <sub>2</sub> O <sub>8</sub>                 | CH <sub>3</sub> CN /HOAc (4:1)      | 70        | 39        |
| 27              | CuCN                 | PIDA                                                          | CH <sub>3</sub> CN /HOAc (4:1)      | 70        | NR        |
| 28              | CuCN                 | TBHP                                                          | CH <sub>3</sub> CN /HOAc (4:1)      | 70        | Trace     |
| 29 <sup>c</sup> | CuCN                 | (NH <sub>4</sub> ) <sub>2</sub> S <sub>2</sub> O <sub>8</sub> | CH <sub>3</sub> CN /HOAc (4:1)      | 70        | 61        |
| 30 <sup>d</sup> | CuCN                 | (NH <sub>4</sub> ) <sub>2</sub> S <sub>2</sub> O <sub>8</sub> | CH <sub>3</sub> CN /HOAc (4:1)      | 70        | 85        |
| 31              | CuCN + L1            | (NH <sub>4</sub> ) <sub>2</sub> S <sub>2</sub> O <sub>8</sub> | CH <sub>3</sub> CN /HOAc (4:1)      | 70        | 70        |
| 32              | CuCN + L2            | (NH <sub>4</sub> ) <sub>2</sub> S <sub>2</sub> O <sub>8</sub> | CH <sub>3</sub> CN /HOAc (4:1)      | 70        | 74        |
| 33              | CuCN + L3            | (NH <sub>4</sub> ) <sub>2</sub> S <sub>2</sub> O <sub>8</sub> | CH <sub>3</sub> CN /HOAc (4:1)      | 70        | 68        |
| 34              | CuCN + L4            | (NH <sub>4</sub> ) <sub>2</sub> S <sub>2</sub> O <sub>8</sub> | CH <sub>3</sub> CN /HOAc (4:1)      | 70        | 59        |
| 35              | CuCN + L5            | (NH <sub>4</sub> ) <sub>2</sub> S <sub>2</sub> O <sub>8</sub> | CH <sub>3</sub> CN /HOAc (4:1)      | 70        | 83        |
| 36              | CuCN + L6            | (NH <sub>4</sub> ) <sub>2</sub> S <sub>2</sub> O <sub>8</sub> | CH <sub>3</sub> CN /HOAc (4:1)      | 70        | 40        |

<sup>a</sup>Reaction conditions: **1a** (0.1 mmol), AgSCF<sub>3</sub> (0.2 mmol), catalyst (0.02 mmol), oxidant (0.2 mmol), solvent (2.0 mL), under N<sub>2</sub>, 70 °C, 3 h. <sup>b</sup>Yields determined by <sup>19</sup>F NMR spectroscopy using trifluoromethylbenzene as an internal standard. <sup>c</sup>AgSCF<sub>3</sub> (1.5 mmol). <sup>d</sup>AgSCF<sub>3</sub> (3.0 mmol).

### Optimization of reaction conditions for bis-trifluoromethylthiolation <sup>a</sup>

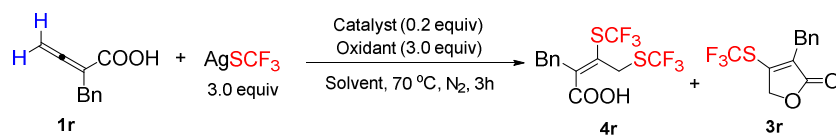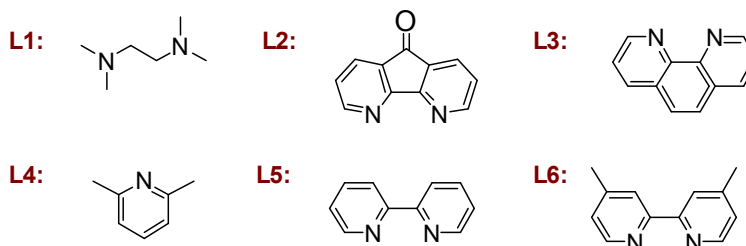

| Entry | Catalyst             | Oxidant                                                       | Solvent (x:y)                 | <b>4r/3r</b> Yield (%) <sup>b</sup> |
|-------|----------------------|---------------------------------------------------------------|-------------------------------|-------------------------------------|
| 1     | CuCN                 | (NH <sub>4</sub> ) <sub>2</sub> S <sub>2</sub> O <sub>8</sub> | CH <sub>3</sub> CN/HOAc (4:1) | 16/trace                            |
| 2     | Cu(OAc) <sub>2</sub> | (NH <sub>4</sub> ) <sub>2</sub> S <sub>2</sub> O <sub>8</sub> | CH <sub>3</sub> CN/HOAc (4:1) | 24/trace                            |
| 3     | CuCl <sub>2</sub>    | (NH <sub>4</sub> ) <sub>2</sub> S <sub>2</sub> O <sub>8</sub> | CH <sub>3</sub> CN/HOAc (4:1) | 19/trace                            |

|    |                           |                                                               |                                                        |          |
|----|---------------------------|---------------------------------------------------------------|--------------------------------------------------------|----------|
| 4  | CuI                       | (NH <sub>4</sub> ) <sub>2</sub> S <sub>2</sub> O <sub>8</sub> | CH <sub>3</sub> CN/HOAc (4:1)                          | 12/trace |
| 5  | Cu(OAc) <sub>2</sub>      | (NH <sub>4</sub> ) <sub>2</sub> S <sub>2</sub> O <sub>8</sub> | CH <sub>3</sub> CN/HCOOH (4:1)                         | 28/trace |
| 6  | Cu(OAc) <sub>2</sub>      | (NH <sub>4</sub> ) <sub>2</sub> S <sub>2</sub> O <sub>8</sub> | CH <sub>3</sub> CN/HCOOH (9:1)                         | 23/trace |
| 7  | Cu(OAc) <sub>2</sub>      | (NH <sub>4</sub> ) <sub>2</sub> S <sub>2</sub> O <sub>8</sub> | CH <sub>3</sub> CN/HCOOH (2:1)                         | 21/trace |
| 8  | Cu(OAc) <sub>2</sub>      | (NH <sub>4</sub> ) <sub>2</sub> S <sub>2</sub> O <sub>8</sub> | CH <sub>3</sub> CN/HCOOH (1:1)                         | 17/trace |
| 9  | Cu(OAc) <sub>2</sub>      | (NH <sub>4</sub> ) <sub>2</sub> S <sub>2</sub> O <sub>8</sub> | CH <sub>3</sub> CN/H <sub>2</sub> O/HCOOH (4 : 0.5: 1) | 35/2     |
| 10 | Cu(OAc) <sub>2</sub>      | (NH <sub>4</sub> ) <sub>2</sub> S <sub>2</sub> O <sub>8</sub> | CH <sub>3</sub> CN/H <sub>2</sub> O/HCOOH (4 : 1.0: 1) | 38/2     |
| 11 | Cu(OAc) <sub>2</sub>      | (NH <sub>4</sub> ) <sub>2</sub> S <sub>2</sub> O <sub>8</sub> | CH <sub>3</sub> CN/H <sub>2</sub> O/HCOOH (4 : 1.5: 1) | 45/3     |
| 12 | Cu(OAc) <sub>2</sub>      | (NH <sub>4</sub> ) <sub>2</sub> S <sub>2</sub> O <sub>8</sub> | CH <sub>3</sub> CN/H <sub>2</sub> O/HCOOH (4 : 2.0: 1) | 51/5     |
| 13 | Cu(OAc) <sub>2</sub>      | (NH <sub>4</sub> ) <sub>2</sub> S <sub>2</sub> O <sub>8</sub> | CH <sub>3</sub> CN/H <sub>2</sub> O/HCOOH (4 : 3.0: 1) | 45/5     |
| 14 | ---                       | (NH <sub>4</sub> ) <sub>2</sub> S <sub>2</sub> O <sub>8</sub> | CH <sub>3</sub> CN/H <sub>2</sub> O/HCOOH (4 : 2.0: 1) | NR       |
| 15 | Cu(OAc) <sub>2</sub>      | K <sub>2</sub> S <sub>2</sub> O <sub>8</sub>                  | CH <sub>3</sub> CN/H <sub>2</sub> O/HCOOH (4 : 2.0: 1) | 45/4     |
| 16 | Cu(OAc) <sub>2</sub>      | Na <sub>2</sub> S <sub>2</sub> O <sub>8</sub>                 | CH <sub>3</sub> CN/H <sub>2</sub> O/HCOOH (4 : 2.0: 1) | 41/4     |
| 17 | Cu(OAc) <sub>2</sub>      | PIDA                                                          | CH <sub>3</sub> CN/H <sub>2</sub> O/HCOOH (4 : 2.0: 1) | NR       |
| 18 | Cu(OAc) <sub>2</sub>      | TBHP                                                          | CH <sub>3</sub> CN/H <sub>2</sub> O/HCOOH (4 : 2.0: 1) | trace    |
| 19 | Cu(OAc) <sub>2</sub> + L1 | (NH <sub>4</sub> ) <sub>2</sub> S <sub>2</sub> O <sub>8</sub> | CH <sub>3</sub> CN/H <sub>2</sub> O/HCOOH (4 : 2.0: 1) | 35/5     |
| 20 | Cu(OAc) <sub>2</sub> + L2 | (NH <sub>4</sub> ) <sub>2</sub> S <sub>2</sub> O <sub>8</sub> | CH <sub>3</sub> CN/H <sub>2</sub> O/HCOOH (4 : 2.0: 1) | 45/6     |
| 21 | Cu(OAc) <sub>2</sub> + L3 | (NH <sub>4</sub> ) <sub>2</sub> S <sub>2</sub> O <sub>8</sub> | CH <sub>3</sub> CN/H <sub>2</sub> O/HCOOH (4 : 2.0: 1) | 39/5     |
| 22 | Cu(OAc) <sub>2</sub> + L4 | (NH <sub>4</sub> ) <sub>2</sub> S <sub>2</sub> O <sub>8</sub> | CH <sub>3</sub> CN/H <sub>2</sub> O/HCOOH (4 : 2.0: 1) | 38/6     |
| 23 | Cu(OAc) <sub>2</sub> + L5 | (NH <sub>4</sub> ) <sub>2</sub> S <sub>2</sub> O <sub>8</sub> | CH <sub>3</sub> CN/H <sub>2</sub> O/HCOOH (4 : 2.0: 1) | 12/3     |
| 24 | Cu(OAc) <sub>2</sub> + L6 | (NH <sub>4</sub> ) <sub>2</sub> S <sub>2</sub> O <sub>8</sub> | CH <sub>3</sub> CN/H <sub>2</sub> O/HCOOH (4 : 2.0: 1) | 14/3     |

<sup>a</sup>Reaction conditions: **1r** (0.1 mmol), AgSCF<sub>3</sub> (0.3 mmol), catalyst (0.02 mmol), oxidant (0.3 mmol), solvent (2.8 mL), under N<sub>2</sub>, 70 °C, 3 h. <sup>b</sup>Yields determined by <sup>19</sup>F NMR spectroscopy using trifluoromethylbenzene as an internal standard.

#### 4. Cyclic Oxytrifluoromethylthiolation of 2,3-Allenic Acids with AgSCF<sub>3</sub>

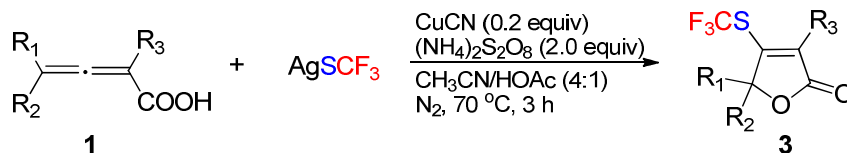

A 25 mL Schlenk tube equipped with a magnetic stir bar was charged with 2,3-allenic acid (0.2 mmol, 1.0 equiv), CuCN (3.6 mg, 0.04 mmol, 0.2 equiv), AgSCF<sub>3</sub> (83.6 mg, 0.4 mmol, 2.0 equiv), and (NH<sub>4</sub>)<sub>2</sub>S<sub>2</sub>O<sub>8</sub> (91.3 mg, 0.4 mmol, 2.0 equiv). The tube was sealed with a septum, evacuated, and backfilled with nitrogen three times. Then CH<sub>3</sub>CN (3.2 mL) and HOAc (0.8 mL) was added by a syringe. The mixture was stirred at 70 °C for 3 h. A saturated ammonium chloride aqueous solution (5 mL) was added. The resulting mixture was filtered by Celite, eluted with ethyl acetate. The organic phase was washed with brine, dried over Na<sub>2</sub>SO<sub>4</sub>, filtered, and concentrated under reduced vacuum. The residue was purified with silica gel column chromatography to provide the pure product.



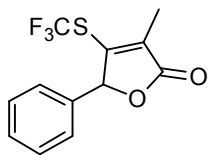

### 3-Methyl-5-phenyl-4-((trifluoromethyl)thio)furan-2(5H)-one (3a)

Compound **3a** was obtained as a yellow oil (44.3 mg, 81%), with PE/EA = 30:1 as eluent for the column chromatography.  $^1\text{H}$  NMR (400 MHz,  $\text{CDCl}_3$ )  $\delta$  7.35-7.28 (m, 3H), 7.15-7.12 (m, 2H), 5.81 (d,  $J$  = 1.8 Hz, 1H), 2.06 (d,  $J$  = 1.9 Hz, 3H).  $^{19}\text{F}$  NMR (377 MHz,  $\text{CDCl}_3$ )  $\delta$  -37.8 (s, 3F).  $^{13}\text{C}$  NMR (101 MHz,  $\text{CDCl}_3$ )  $\delta$  169.9, 144.5, 137.5, 132.0, 128.9, 128.0, 127.1 (q,  $J$  = 311.2 Hz), 126.3, 84.2 (d,  $J$  = 0.7 Hz), 9.6. IR (KBr):  $\nu$  2960, 2923, 2858, 1767, 1507, 1448, 1301, 1139, 1098, 1045, 989, 757, 697, 516  $\text{cm}^{-1}$ . MS (EI)  $m/z$ : 274  $[\text{M}]^+$ . HRMS (EI)  $m/z$ : Calcd for  $\text{C}_{12}\text{H}_9\text{F}_3\text{O}_2\text{S}$  274.0275; found: 274.0276.

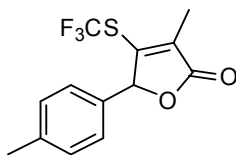

### 3-Methyl-5-(*p*-tolyl)-4-((trifluoromethyl)thio)furan-2(5H)-one (3b)

Compound **3b** was obtained as a yellow oil (43.3 mg, 75%), with PE/EA = 30:1 as eluent for the column chromatography.  $^1\text{H}$  NMR (400 MHz,  $\text{CDCl}_3$ )  $\delta$  7.10 (d,  $J$  = 7.9 Hz, 2H), 7.00 (d,  $J$  = 8.1 Hz, 2H), 5.77 (d,  $J$  = 1.6 Hz, 1H), 2.25 (s, 3H), 2.04 (d,  $J$  = 1.8 Hz, 3H).  $^{19}\text{F}$  NMR (377 MHz,  $\text{CDCl}_3$ )  $\delta$  -37.9 (s, 3F).  $^{13}\text{C}$  NMR (151 MHz,  $\text{CDCl}_3$ )  $\delta$  171.0, 145.6 (d,  $J$  = 1.7 Hz), 140.0, 138.3, 130.0, 129.8, 128.2 (q,  $J$  = 311.1 Hz), 127.3, 85.2, 21.3, 10.6. IR (KBr):  $\nu$  2962, 2920, 2878, 1668, 1516, 1488, 1301, 1261, 1140, 1100, 987, 815, 745, 632, 517  $\text{cm}^{-1}$ . MS (EI)  $m/z$ : 288  $[\text{M}]^+$ . HRMS (EI)  $m/z$ : Calcd for  $\text{C}_{13}\text{H}_{11}\text{F}_3\text{O}_2\text{S}$  288.0432; found: 288.0437.

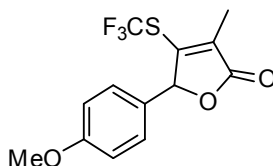

### 5-(4-Methoxyphenyl)-3-methyl-4-((trifluoromethyl)thio)furan-2(5H)-one (3c)

Compound **3c** was obtained as a yellow oil (31.6 mg, 52%), with PE/EA = 30:1 as eluent for the column chromatography.  $^1\text{H}$  NMR (400 MHz,  $\text{CDCl}_3$ )  $\delta$  7.05 (d,  $J$  = 8.7 Hz, 2H), 6.84 (d,  $J$  = 8.8 Hz, 2H), 5.79 (d,  $J$  = 1.7 Hz, 1H), 3.74 (s, 3H), 2.07 (d,  $J$  = 1.9 Hz, 3H).  $^{19}\text{F}$  NMR (377 MHz,  $\text{CDCl}_3$ )  $\delta$  -37.8 (s, 3F).  $^{13}\text{C}$  NMR (151 MHz,  $\text{CDCl}_3$ )  $\delta$  170.0, 159.8, 144.6 (d,  $J$  = 1.8 Hz), 137.2, 127.8, 127.1 (q,  $J$  = 311.1 Hz), 123.7, 113.5, 84.1, 54.3, 9.6. IR (KBr):  $\nu$  2960, 2925, 2872, 1767, 1624, 1515, 1306, 1250, 1140, 1100, 983, 830, 797, 613, 539  $\text{cm}^{-1}$ . MS (EI)  $m/z$ : 304  $[\text{M}]^+$ . HRMS (EI)  $m/z$ : Calcd for  $\text{C}_{13}\text{H}_{11}\text{F}_3\text{O}_3\text{S}$  304.0381; found: 304.0383.

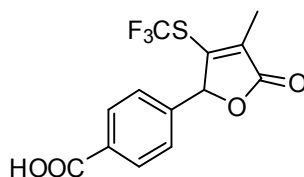

**4-(4-Methyl-5-oxo-3-((trifluoromethyl)thio)-2,5-dihydrofuran-2-yl)benzoic acid (3d)**

Compound **3d** was obtained as a white solid (25.7 mg, 40%), with PE/EA = 10:1 as eluent for the column chromatography. Mp 150-152 °C. <sup>1</sup>H NMR (400 MHz, CDCl<sub>3</sub>) δ 9.80 (s, 1H), 8.09 (d, *J* = 8.3 Hz, 2H), 7.30 (d, *J* = 8.3 Hz, 2H), 5.90 (d, *J* = 1.6 Hz, 1H), 2.10 (d, *J* = 1.8 Hz, 3H). <sup>19</sup>F NMR (377 MHz, CDCl<sub>3</sub>) δ -37.7 (s, 3F). <sup>13</sup>C NMR (101 MHz, CDCl<sub>3</sub>) δ 171.1, 170.7, 145.1 (d, *J* = 1.9 Hz), 139.2, 138.8, 130.9, 130.7, 128.0 (q, *J* = 311.2 Hz), 127.3, 84.3, 10.8. IR (KBr): ν 2958, 2920, 2873, 2567, 1772, 1695, 1425, 1286, 1143, 1101, 1047, 999, 860, 734, 704, 513 cm<sup>-1</sup>. MS (ESI) *m/z*: 319 [M+H]<sup>+</sup>. HRMS (ESI) *m/z*: Calcd for C<sub>13</sub>H<sub>10</sub>F<sub>3</sub>O<sub>4</sub>S 319.0246; found [M+H]<sup>+</sup>: 319.0245.

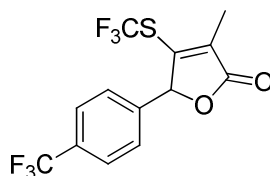

**3-Methyl-5-(4-(trifluoromethyl)phenyl)-4-((trifluoromethyl)thio)furan-2(5H)-one (3e)**

Compound **3e** was obtained as a yellow oil (36.2 mg, 53%), with PE/EA = 30:1 as eluent for the column chromatography. <sup>1</sup>H NMR (400 MHz, CDCl<sub>3</sub>) δ 7.61 (d, *J* = 8.2 Hz, 2H), 7.30 (d, *J* = 8.2 Hz, 2H), 5.87 (d, *J* = 1.7 Hz, 1H), 2.09 (d, *J* = 1.9 Hz, 3H). <sup>19</sup>F NMR (377 MHz, CDCl<sub>3</sub>) δ -37.8 (s, 3F), -62.9 (s, 3F). <sup>13</sup>C NMR (151 MHz, CDCl<sub>3</sub>) δ 169.5, 144.0 (d, *J* = 1.6 Hz), 138.2, 136.1, 131.1 (q, *J* = 32.8 Hz), 127.0 (q, *J* = 311.4 Hz), 126.6, 125.1 (q, *J* = 3.8 Hz), 122.7 (q, *J* = 272.4 Hz), 83.1, 9.7. IR (KBr): ν 2961, 2924, 2865, 1773, 1634, 1422, 1325, 1101, 1065, 1003, 910, 830, 739, 636 cm<sup>-1</sup>. MS (EI) *m/z*: 342 [M]<sup>+</sup>. HRMS (EI) *m/z*: Calcd for C<sub>13</sub>H<sub>8</sub>F<sub>6</sub>O<sub>2</sub>S 342.0149; found: 342.0142.

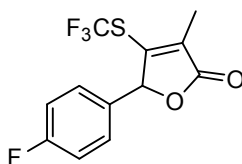

**5-(4-Fluorophenyl)-3-methyl-4-((trifluoromethyl)thio)furan-2(5H)-one (3f)**

Compound **3f** was obtained as a white solid (40.3 mg, 69%), with PE/EA = 30:1 as eluent for the column chromatography. Mp 69-71 °C. <sup>1</sup>H NMR (400 MHz, CDCl<sub>3</sub>) δ 7.17-7.10 (m, 2H), 7.06-6.99 (m, 2H), 5.81 (d, *J* = 1.7 Hz, 1H), 2.07 (d, *J* = 1.9 Hz,

3H).  $^{19}\text{F}$  NMR (377 MHz,  $\text{CDCl}_3$ )  $\delta$  -37.8 (s, 3F), -110.7--110.8 (m, 1F).  $^{13}\text{C}$  NMR (151 MHz,  $\text{CDCl}_3$ )  $\delta$  170.7, 163.5 (d,  $J$  = 249.2 Hz), 145.4 (d,  $J$  = 1.4 Hz), 138.6, 129.3, 129.2, 128.8 (d,  $J$  = 4.5 Hz), 128.1 (q,  $J$  = 311.3 Hz), 116.3, 116.1, 84.4, 10.7. IR (KBr):  $\nu$  2960, 2921, 2852, 1770, 1616, 1512, 1301, 1234, 1141, 1099, 997, 834, 796, 524  $\text{cm}^{-1}$ . MS (EI)  $m/z$ : 292  $[\text{M}]^+$ . HRMS (EI)  $m/z$ : Calcd for  $\text{C}_{12}\text{H}_8\text{F}_4\text{O}_2\text{S}$  292.0181; found: 292.0175.

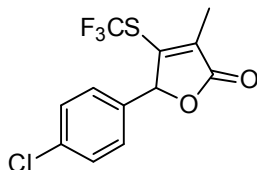

**5-(4-Chlorophenyl)-3-methyl-4-((trifluoromethyl)thio)furan-2(5H)-one (3g)**

Compound **3g** was obtained as a yellow oil (44.4 mg, 72%), with PE/EA = 30:1 as eluent for the column chromatography.  $^1\text{H}$  NMR (400 MHz,  $\text{CDCl}_3$ )  $\delta$  7.28 (d,  $J$  = 8.5 Hz, 2H), 7.08 (d,  $J$  = 8.5 Hz, 2H), 5.78 (d,  $J$  = 1.6 Hz, 1H), 2.05 (d,  $J$  = 1.9 Hz, 3H).  $^{19}\text{F}$  NMR (377 MHz,  $\text{CDCl}_3$ )  $\delta$  -37.8 (s, 3F).  $^{13}\text{C}$  NMR (151 MHz,  $\text{CDCl}_3$ )  $\delta$  170.6, 145.2 (d,  $J$  = 1.7 Hz), 138.8, 135.9, 131.6, 129.3, 128.6, 128.1 (q,  $J$  = 311.3 Hz), 84.3, 10.7. IR (KBr):  $\nu$  2979, 2925, 2852, 1769, 1613, 1493, 1347, 1169, 1100, 1082, 992, 821, 733, 647, 513  $\text{cm}^{-1}$ . MS (EI)  $m/z$ : 308  $[\text{M}]^+$ . HRMS (EI)  $m/z$ : Calcd for  $\text{C}_{12}\text{H}_8\text{ClF}_3\text{O}_2\text{S}$  307.9886; found: 307.9889.

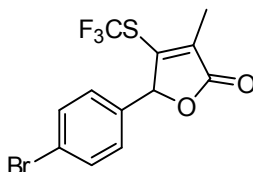

**5-(4-Bromophenyl)-3-methyl-4-((trifluoromethyl)thio)furan-2(5H)-one (3h)**

Compound **3h** was obtained as a white solid (52.0 mg, 74%), with PE/EA = 30:1 as eluent for the column chromatography. Mp 40-42  $^{\circ}\text{C}$ .  $^1\text{H}$  NMR (400 MHz,  $\text{CDCl}_3$ )  $\delta$  7.47 (d,  $J$  = 8.5 Hz, 2H), 7.03 (d,  $J$  = 8.4 Hz, 2H), 5.78 (d,  $J$  = 1.7 Hz, 1H), 2.07 (d,  $J$  = 1.9 Hz, 3H).  $^{19}\text{F}$  NMR (377 MHz,  $\text{CDCl}_3$ )  $\delta$  -37.7 (s, 3F).  $^{13}\text{C}$  NMR (151 MHz,  $\text{CDCl}_3$ )  $\delta$  170.6, 145.2 (d,  $J$  = 1.7 Hz), 138.8, 132.3, 132.1, 128.8, 128.1 (q,  $J$  = 311.4 Hz), 124.2, 84.4, 10.7. IR (KBr):  $\nu$  2980, 2963, 2858, 1770, 1667, 1535, 1490, 1301, 1260, 1140, 1100, 1068, 1004, 780, 747, 624, 505  $\text{cm}^{-1}$ . MS (EI)  $m/z$ : 352  $[\text{M}]^+$ . HRMS (EI)  $m/z$ : Calcd for  $\text{C}_{12}\text{H}_8\text{BrF}_3\text{O}_2\text{S}$  351.9380; found: 351.9366.

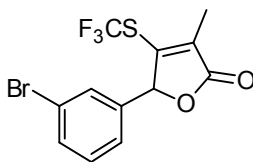

**5-(3-Bromophenyl)-3-methyl-4-((trifluoromethyl)thio)furan-2(5H)-one (3i)**

Compound **3i** was obtained as a yellow oil (42.8 mg, 61%), with PE/EA = 30:1 as eluent for the column chromatography.  $^1\text{H}$  NMR (400 MHz,  $\text{CDCl}_3$ )  $\delta$  7.45 (ddd,  $J$  = 8.0, 1.7, 1.0 Hz, 1H), 7.27 (t,  $J$  = 1.7 Hz, 1H), 7.19 (t,  $J$  = 7.8 Hz, 1H), 7.10 (d,  $J$  = 7.8 Hz, 1H), 5.76 (d,  $J$  = 1.8 Hz, 1H), 2.06 (d,  $J$  = 1.9 Hz, 3H).  $^{19}\text{F}$  NMR (377 MHz,  $\text{CDCl}_3$ )  $\delta$  -37.8 (s, 3F).  $^{13}\text{C}$  NMR (151 MHz,  $\text{CDCl}_3$ )  $\delta$  170.6, 145.0 (d,  $J$  = 1.7 Hz), 139.1, 135.3, 133.1, 130.6, 130.0, 128.1 (q,  $J$  = 311.4 Hz), 126.1, 123.0, 84.2, 10.7. IR (KBr):  $\nu$  2962, 2932, 2856, 1769, 1546, 1431, 1296, 1140, 1098, 997, 876, 784, 697, 646  $\text{cm}^{-1}$ . MS (EI)  $m/z$ : 352  $[\text{M}]^+$ . HRMS (EI)  $m/z$ : Calcd for  $\text{C}_{12}\text{H}_8\text{BrF}_3\text{O}_2\text{S}$  351.9380; found: 351.9375.

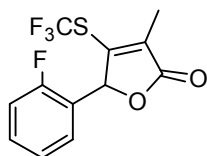

**5-(2-Fluorophenyl)-3-methyl-4-((trifluoromethyl)thio)furan-2(5H)-one (3j)**

Compound **3j** was obtained as a yellow oil (38.0 mg, 65%), with PE/EA = 30:1 as eluent for the column chromatography.  $^1\text{H}$  NMR (400 MHz,  $\text{CDCl}_3$ )  $\delta$  7.36-7.29 (m, 1H), 7.13-6.99 (m, 3H), 6.11 (d,  $J$  = 1.9 Hz, 1H), 2.07 (d,  $J$  = 2.0 Hz, 3H).  $^{19}\text{F}$  NMR (377 MHz,  $\text{CDCl}_3$ )  $\delta$  -38.1 (s, 3F), -117.63--117.98 (m, 1F).  $^{13}\text{C}$  NMR (101 MHz,  $\text{CDCl}_3$ )  $\delta$  169.7, 160.7 (d,  $J$  = 251.5 Hz), 143.4 (d,  $J$  = 1.6 Hz), 138.2, 130.9 (d,  $J$  = 9.1 Hz), 127.8 (d,  $J$  = 3.0 Hz), 127.0 (q,  $J$  = 311.2 Hz), 123.7 (d,  $J$  = 1.6 Hz), 119.4 (d,  $J$  = 12.1 Hz), 115.3 (d,  $J$  = 21.2 Hz), 78.7 (d,  $J$  = 2.3 Hz), 9.6. IR (KBr):  $\nu$  2961, 2931, 2856, 1770, 1534, 1493, 1459, 1301, 1142, 1100, 1046, 994, 908, 910, 811, 757, 640  $\text{cm}^{-1}$ . MS (EI)  $m/z$ : 292  $[\text{M}]^+$ . HRMS (EI)  $m/z$ : Calcd for  $\text{C}_{12}\text{H}_8\text{F}_4\text{O}_2\text{S}$  292.0181; found: 292.0180.

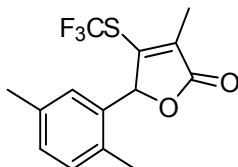

**5-(2,5-Dimethylphenyl)-3-methyl-4-((trifluoromethyl)thio)furan-2(5H)-one (3k)**

Compound **3k** was obtained as a yellow solid (47.1 mg, 78%), with PE/EA = 30:1 as eluent for the column chromatography. Mp 65-67  $^{\circ}\text{C}$ .  $^1\text{H}$  NMR (400 MHz,  $\text{CDCl}_3$ )  $\delta$  7.07-7.01 (m, 2H), 6.58 (s, 1H), 6.12 (q,  $J$  = 1.9 Hz, 1H), 2.34 (s, 3H), 2.20 (s, 3H), 2.11 (d,  $J$  = 1.9 Hz, 3H).  $^{19}\text{F}$  NMR (377 MHz,  $\text{CDCl}_3$ )  $\delta$  -38.2 (s, 3F).  $^{13}\text{C}$  NMR (101 MHz,  $\text{CDCl}_3$ )  $\delta$  170.2, 144.1 (d,  $J$  = 1.9 Hz), 138.3, 135.3, 133.5, 130.2, 129.6, 129.5, 127.2 (q,  $J$  = 311.1 Hz), 125.9, 81.1, 19.9, 17.6, 9.7. IR (KBr):  $\nu$  2961, 2923, 2856, 1768, 1505, 1477, 1296, 1260, 1138, 1100, 981, 805, 749, 651, 541  $\text{cm}^{-1}$ . MS (EI)  $m/z$ : 302  $[\text{M}]^+$ . HRMS (EI)  $m/z$ : Calcd for  $\text{C}_{14}\text{H}_{13}\text{F}_3\text{O}_2\text{S}$  302.0588; found: 302.0583.

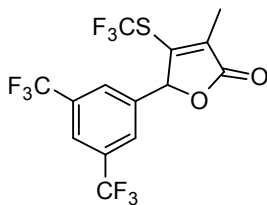

**5-(3,5-Bis(trifluoromethyl)phenyl)-3-methyl-4-((trifluoromethyl)thio)furan-2(5H)-one (3l)**

Compound **3l** was obtained as a yellow oil (32.9 mg, 40%), with PE/EA = 30:1 as eluent for the column chromatography.  $^1\text{H}$  NMR (400 MHz,  $\text{CDCl}_3$ )  $\delta$  7.87 (s, 1H), 7.63 (s, 2H), 5.93 (d,  $J$  = 1.8 Hz, 1H), 2.12 (d,  $J$  = 1.9 Hz, 3H).  $^{19}\text{F}$  NMR (377 MHz,  $\text{CDCl}_3$ )  $\delta$  -37.7 (s, 3F), -63.0 (s, 6F).  $^{13}\text{C}$  NMR (101 MHz,  $\text{CDCl}_3$ )  $\delta$  169.0, 143.3 (d,  $J$  = 1.7 Hz), 139.1, 135.0, 131.7 (q,  $J$  = 34.0 Hz), 126.9 (q,  $J$  = 311.6 Hz), 126.3 (d,  $J$  = 3.1 Hz), 122.9 (dt,  $J$  = 7.6, 3.8 Hz), 121.8 (q,  $J$  = 272.9 Hz), 82.3, 9.9. IR (KBr):  $\nu$  2963, 2928, 2864, 1779, 1657, 1484, 1380, 1239, 1278, 1135, 1099, 1013, 905, 797, 733, 681  $\text{cm}^{-1}$ . MS (EI)  $m/z$ : 410  $[\text{M}]^+$ . HRMS (EI)  $m/z$ : Calcd for  $\text{C}_{14}\text{H}_7\text{F}_9\text{O}_2\text{S}$  410.0023; found: 410.0018.

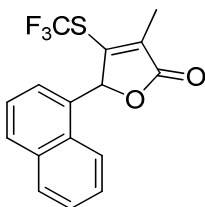

**3-Methyl-5-(naphthalen-1-yl)-4-((trifluoromethyl)thio)furan-2(5H)-one (3m)**

Compound **3m** was obtained as a yellow oil (31.0 mg, 48%), with PE/EA = 30:1 as eluent for the column chromatography.  $^1\text{H}$  NMR (400 MHz,  $\text{CDCl}_3$ )  $\delta$  8.02 (d,  $J$  = 8.4 Hz, 1H), 7.82 (d,  $J$  = 8.2 Hz, 2H), 7.56-7.44 (m, 2H), 7.39-7.33 (m, 1H), 7.10 (dd,  $J$  = 7.2, 0.6 Hz, 1H), 6.69 (d,  $J$  = 1.9 Hz, 1H), 2.13 (d,  $J$  = 1.8 Hz, 3H).  $^{19}\text{F}$  NMR (377 MHz,  $\text{CDCl}_3$ )  $\delta$  -38.0 (s, 3F).  $^{13}\text{C}$  NMR (151 MHz,  $\text{CDCl}_3$ )  $\delta$  171.0, 145.2 (d,  $J$  = 1.8 Hz), 139.6, 134.0, 131.9, 130.8, 129.1, 128.8, 128.2 (q,  $J$  = 311.3 Hz), 127.3, 126.4, 125.4, 125.2, 122.4, 81.4, 10.9. IR (KBr):  $\nu$  2962, 2919, 2853, 1766, 1628, 1554, 1356, 1295, 1140, 1098, 1016, 976, 795, 774, 641, 540  $\text{cm}^{-1}$ . MS (EI)  $m/z$ : 324  $[\text{M}]^+$ . HRMS (EI)  $m/z$ : Calcd for  $\text{C}_{16}\text{H}_{11}\text{F}_3\text{O}_2\text{S}$  324.0432; found: 324.0435.

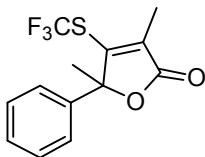

**3,5-Dimethyl-5-phenyl-4-((trifluoromethyl)thio)furan-2(5H)-one (3n)**

Compound **3n** was obtained as a yellow oil (40.6 mg, 70%), with PE/EA = 30:1 as eluent for the column chromatography.  $^1\text{H}$  NMR (400 MHz,  $\text{CDCl}_3$ )  $\delta$  7.31-7.23 (m,

5H), 2.03 (d,  $J = 0.9$  Hz, 3H), 1.86 (s, 3H).  $^{19}\text{F}$  NMR (377 MHz,  $\text{CDCl}_3$ )  $\delta$  -37.4 (s, 3F).  $^{13}\text{C}$  NMR (151 MHz,  $\text{CDCl}_3$ )  $\delta$  170.8, 150.0 (d,  $J = 1.3$  Hz), 138.6, 136.7, 129.0, 128.8, 128.2 (q,  $J = 311.4$  Hz), 125.4, 89.4, 23.5, 11.2 (d,  $J = 1.5$  Hz). IR (KBr):  $\nu$  2962, 2923, 2856, 1763, 1505, 1474, 1292, 1142, 1097, 1063, 1023, 923, 800, 769, 696, 660  $\text{cm}^{-1}$ . MS (EI)  $m/z$ : 288  $[\text{M}]^+$ . HRMS (EI)  $m/z$ : Calcd for  $\text{C}_{13}\text{H}_{11}\text{F}_3\text{O}_2\text{S}$  288.0432; found: 288.0437.

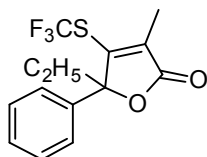

### 5-Ethyl-3-methyl-5-phenyl-4-((trifluoromethyl)thio)furan-2(5H)-one (3o)

Compound **3o** was obtained as a yellow oil (52.6 mg, 87%), with PE/EA = 30:1 as eluent for the column chromatography.  $^1\text{H}$  NMR (400 MHz,  $\text{CDCl}_3$ )  $\delta$  7.34-7.21 (m, 5H), 2.38 (dq,  $J = 14.7, 7.4$  Hz, 1H), 2.05 (dq,  $J = 14.4, 7.2$  Hz, 1H), 2.00 (d,  $J = 0.9$  Hz, 3H), 0.81 (t,  $J = 7.3$  Hz, 3H).  $^{19}\text{F}$  NMR (377 MHz,  $\text{CDCl}_3$ )  $\delta$  -37.0 (s, 3F).  $^{13}\text{C}$  NMR (151 MHz,  $\text{CDCl}_3$ )  $\delta$  171.1, 149.2 (d,  $J = 1.4$  Hz), 138.7, 136.1, 128.8, 128.7, 128.2 (q,  $J = 311.6$  Hz), 125.4, 91.9, 29.2, 11.1 (d,  $J = 1.5$  Hz), 7.5. IR (KBr):  $\nu$  2958, 2920, 2861, 1766, 1521, 1495, 1290, 1167, 1097, 1030, 975, 801, 767, 698, 498  $\text{cm}^{-1}$ . MS (EI)  $m/z$ : 302  $[\text{M}]^+$ . HRMS (EI)  $m/z$ : Calcd for  $\text{C}_{14}\text{H}_{13}\text{F}_3\text{O}_2\text{S}$  302.0588; found: 302.0579.

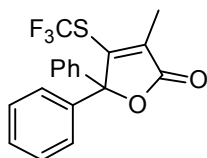

### 3-Methyl-5,5-diphenyl-4-((trifluoromethyl)thio)furan-2(5H)-one (3p)

Compound **3p** was obtained as a yellow solid (63.0 mg, 90%), with PE/EA = 30:1 as eluent for the column chromatography. Mp 67-69  $^{\circ}\text{C}$ .  $^1\text{H}$  NMR (400 MHz,  $\text{CDCl}_3$ )  $\delta$  7.33-7.27 (m, 6H), 7.21-7.17 (m, 4H), 2.12 (d,  $J = 1.2$  Hz, 3H).  $^{19}\text{F}$  NMR (377 MHz,  $\text{CDCl}_3$ )  $\delta$  -37.2 (s, 3F).  $^{13}\text{C}$  NMR (151 MHz,  $\text{CDCl}_3$ )  $\delta$  170.5, 148.4 (d,  $J = 1.2$  Hz), 139.4, 137.4, 129.3, 128.6, 127.8, 127.7 (q,  $J = 312.7$  Hz), 94.0, 11.6 (d,  $J = 1.9$  Hz). IR (KBr):  $\nu$  2960, 2927, 2850, 1771, 1515, 1448, 1290, 1152, 1099, 985, 759, 698, 652  $\text{cm}^{-1}$ . MS (EI)  $m/z$ : 350  $[\text{M}]^+$ . HRMS (EI)  $m/z$ : Calcd for  $\text{C}_{18}\text{H}_{13}\text{F}_3\text{O}_2\text{S}$  350.0588; found: 350.0580.

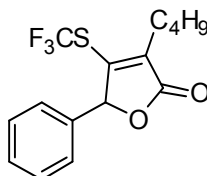

### 3-Butyl-5-phenyl-4-((trifluoromethyl)thio)furan-2(5H)-one (3q)

Compound **3q** was obtained as a yellow oil (48.1 mg, 76%), with PE/EA = 30:1 as eluent for the column chromatography.  $^1\text{H}$  NMR (400 MHz,  $\text{CDCl}_3$ )  $\delta$  7.34-7.30 (m, 3H), 7.14-7.08 (m, 2H), 5.82 (s, 1H), 2.54-2.40 (m, 2H), 1.60-1.46 (m, 2H), 1.30 (dq,  $J$  = 14.8, 7.4 Hz, 2H), 0.87 (t,  $J$  = 7.3 Hz, 3H).  $^{19}\text{F}$  NMR (377 MHz,  $\text{CDCl}_3$ )  $\delta$  -37.8 (s, 3F).  $^{13}\text{C}$  NMR (151 MHz,  $\text{CDCl}_3$ )  $\delta$  170.5, 145.5 (d,  $J$  = 1.7 Hz), 142.1, 133.3, 129.9, 129.1, 128.0 (q,  $J$  = 311.1 Hz), 127.3, 84.9, 29.8, 25.0, 22.5, 13.7. IR (KBr):  $\nu$  2962, 2931, 2860, 1769, 1543, 1457, 1315, 1263, 1140, 1104, 1003, 944, 802, 757, 697, 645  $\text{cm}^{-1}$ . MS (EI)  $m/z$ : 316  $[\text{M}]^+$ . HRMS (EI)  $m/z$ : Calcd for  $\text{C}_{15}\text{H}_{15}\text{F}_3\text{O}_2\text{S}$  316.0745; found  $[\text{M}]^+$ : 316.0740.

## Cyclic Oxytrifluoromethylthiolation of 2,3-Allenoic Acid **1a** on a 1.0

### mmol Scale:

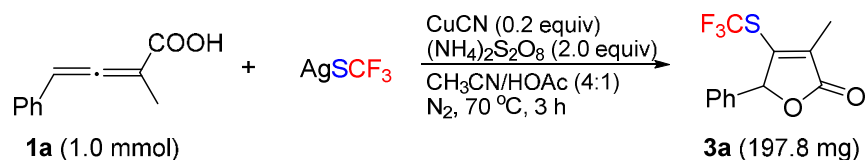

2-Methyl-4-phenylbuta-2,3-dienoic acid (174.2 mg, 1.0 mmol, 1.0 equiv),  $\text{CuCN}$  (17.9 mg, 0.2 mmol, 0.2 equiv),  $\text{AgSCF}_3$  (417.9 mg, 2.0 mmol, 2.0 equiv), and  $(\text{NH}_4)_2\text{S}_2\text{O}_8$  (456.4 mg, 2.0 mmol, 2.0 equiv) were added to a Schlenk tube. The tube was sealed with a septum, evacuated, and backfilled with nitrogen three times. Then  $\text{CH}_3\text{CN}$  (16 mL) and  $\text{HOAc}$  (4 mL) was added by a syringe. The mixture was stirred at 70 °C for 3 h. A saturated ammonium chloride aqueous solution (15 mL) was added. The resulting mixture was filtered by Celite, eluted with ethyl acetate. The organic phase was washed with brine, dried over  $\text{Na}_2\text{SO}_4$ , filtered, and concentrated under reduced vacuum. The residue was purified with silica gel column chromatography (PE/EA = 30:1) to give **3a** (197.8 mg, 72%) as a yellow oil.

## 5. Bis-Trifluoromethylthiolation of 2,3-Allenoic Acids with $\text{AgSCF}_3$

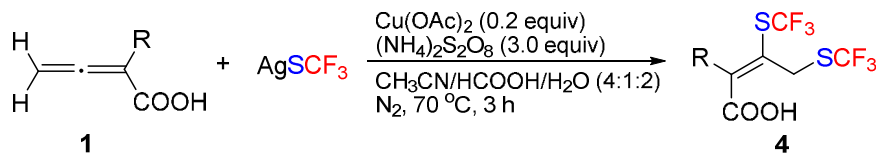

A 25 mL Schlenk tube equipped with a magnetic stir bar was charged with 2,3-allenoic acid (0.2 mmol, 1.0 equiv),  $\text{Cu}(\text{OAc})_2$  (7.3 mg, 0.04 mmol, 0.2 equiv),  $\text{AgSCF}_3$  (125.4 mg, 0.6 mmol, 3.0 equiv), and  $(\text{NH}_4)_2\text{S}_2\text{O}_8$  (136.9 mg, 0.6 mmol, 3.0 equiv). The tube was sealed with a septum, evacuated, and backfilled with nitrogen three times. Then  $\text{CH}_3\text{CN}$  (3.2 mL),  $\text{HCOOH}$  (0.8 mL) and  $\text{H}_2\text{O}$  (1.6 mL) were added

by a syringe. The mixture was stirred at 70 °C for 3 h. A saturated ammonium chloride aqueous solution (5 mL) was added. The resulting mixture was filtered by Celite, eluted with ethyl acetate. The organic phase was washed with brine, dried over Na<sub>2</sub>SO<sub>4</sub>, filtered, and concentrated under reduced vacuum. The residue was purified with silica gel column chromatography to provide the pure product.

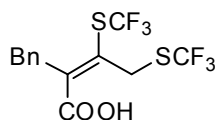

**(*E*)-2-Benzyl-3,4-bis((trifluoromethyl)thio)but-2-enoic acid (4r)**

Compound **4r** was obtained as a yellow solid (37.6 mg, 50%), with PE/EA = 5:1 as eluent for the column chromatography. Mp 73-75 °C. <sup>1</sup>H NMR (600 MHz, CDCl<sub>3</sub>) δ 10.64 (s, 1H), 7.32 (t, *J* = 7.4 Hz, 2H), 7.27 (t, *J* = 7.4 Hz, 1H), 7.14 (d, *J* = 7.3 Hz, 2H), 4.28 (s, 2H), 4.17 (s, 2H). <sup>19</sup>F NMR (377 MHz, CDCl<sub>3</sub>) δ -39.3 (s, 3F), -40.8 (s, 3F). <sup>13</sup>C NMR (151 MHz, CDCl<sub>3</sub>) δ 170.8, 145.3, 136.1, 134.1, 130.4 (q, *J* = 307.4 Hz), 129.0 (q, *J* = 310.8 Hz), 128.8, 128.3, 127.1, 38.8, 34.9. IR (KBr): ν 2962, 2921, 2861, 1764, 1586, 1454, 1352, 1251, 1119, 1095, 1036, 958, 752, 697, 467 cm<sup>-1</sup>. MS (ESI) *m/z*: 375 [M-H]<sup>-</sup>. HRMS (ESI) *m/z*: Calcd for C<sub>13</sub>H<sub>9</sub>F<sub>6</sub>O<sub>2</sub>S<sub>2</sub> 374.9973, found [M-H]<sup>-</sup>: 374.9953.

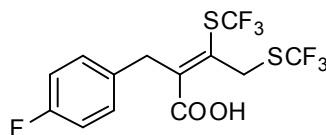

**(*E*)-2-(4-Fluorobenzyl)-3,4-bis((trifluoromethyl)thio)but-2-enoic acid (4s)**

Compound **4s** was obtained as a yellow oil (49.6 mg, 63%), with PE/EA = 5:1 as eluent for the column chromatography. <sup>1</sup>H NMR (600 MHz, CDCl<sub>3</sub>) δ 9.00 (s, 1H), 7.11-7.09 (m, 2H), 7.03-6.99 (m, 2H), 4.27 (s, 2H), 4.12 (s, 2H). <sup>19</sup>F NMR (377 MHz, CDCl<sub>3</sub>) δ -38.5 (s, 3F), -41.1 (s, 3F), -115.3--115.4 (m, 1F). <sup>13</sup>C NMR (151 MHz, CDCl<sub>3</sub>) δ 170.1, 161.9 (d, *J* = 246.1 Hz), 145.1, 134.2, 131.7 (d, *J* = 3.0 Hz), 130.3 (q, *J* = 307.4 Hz), 129.9 (d, *J* = 7.5 Hz), 128.9 (q, *J* = 311.1 Hz), 115.7 (d, *J* = 37.8 Hz), 38.1, 35.0. IR (KBr): ν 2960, 2927, 2857, 1701, 1605, 1510, 1405, 1260, 1159, 1096, 1016, 954, 802, 756 cm<sup>-1</sup>. MS (ESI) *m/z*: 393 [M-H]<sup>-</sup>. HRMS (ESI) *m/z*: Calcd for C<sub>13</sub>H<sub>8</sub>F<sub>7</sub>O<sub>2</sub>S<sub>2</sub> 392.9859, found [M-H]<sup>-</sup>: 392.9866.

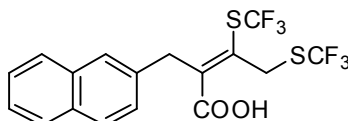

**(*E*)-2-(Naphthalen-2-ylmethyl)-3,4-bis((trifluoromethyl)thio)but-2-enoic acid (4t)**

Compound **4t** was obtained as a yellow solid (38.3 mg, 45%), with PE/EA = 5:1 as eluent for the column chromatography. Mp 117-119 °C. <sup>1</sup>H NMR (400 MHz, CDCl<sub>3</sub>) δ 8.33 (s, 1H), 7.74-7.63 (m, 3H), 7.43 (s, 1H), 7.41-7.34 (m, 2H), 7.15 (dd, *J* = 8.4,



1.7 Hz, 1H), 4.20 (s, 2H), 4.18 (s, 2H).  $^{19}\text{F}$  NMR (377 MHz,  $\text{CDCl}_3$ )  $\delta$  -38.4 (s, 3F), -41.0 (s, 3F).  $^{13}\text{C}$  NMR (151 MHz,  $\text{CDCl}_3$ )  $\delta$  170.3, 144.9, 134.6, 133.6, 133.5, 132.4, 130.3 (q,  $J$  = 307.4 Hz), 129.0 (q,  $J$  = 314.2 Hz), 128.6, 127.7, 127.6, 126.8, 126.5, 126.3, 125.9, 38.9, 35.0. IR (KBr):  $\nu$  2960, 2925, 2855, 1704, 1522, 1463, 1261, 1160, 1099, 974, 907, 807, 732, 649  $\text{cm}^{-1}$ . MS (ESI)  $m/z$ : 425  $[\text{M-H}]^-$ . HRMS (ESI)  $m/z$ : Calcd for  $\text{C}_{17}\text{H}_{11}\text{F}_6\text{O}_2\text{S}_2$  425.0114, found  $[\text{M-H}]^-$ : 425.0110.

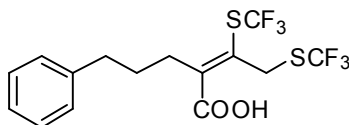

**(*E*)-2-(1,2-Bis((trifluoromethyl)thio)ethylidene)-5-phenylpentanoic acid (4u)**

Compound **4u** was obtained as a yellow oil (36.4 mg, 45%), with PE/EA = 5:1 as eluent for the column chromatography.  $^1\text{H}$  NMR (400 MHz,  $\text{CDCl}_3$ )  $\delta$  9.53 (s, 1H), 7.23-7.09 (m, 5H), 4.11 (s, 2H), 2.75-2.66 (m, 2H), 2.59 (t,  $J$  = 7.7 Hz, 2H), 1.78-1.68 (m, 2H).  $^{19}\text{F}$  NMR (377 MHz,  $\text{CDCl}_3$ )  $\delta$  -38.9 (s, 3F), -41.1 (s, 3F).  $^{13}\text{C}$  NMR (101 MHz,  $\text{CDCl}_3$ )  $\delta$  170.5, 146.3, 140.0, 131.4, 129.3 (q,  $J$  = 307.4 Hz), 128.0 (q,  $J$  = 310.5 Hz), 127.4, 127.3, 125.1, 34.4, 34.1, 32.1, 28.9. IR (KBr):  $\nu$  2961, 2926, 2849, 1717, 1633, 1426, 1323, 1264, 1154, 1099, 971, 908, 754, 698, 646  $\text{cm}^{-1}$ . MS (ESI)  $m/z$ : 403  $[\text{M-H}]^-$ . HRMS (ESI)  $m/z$ : Calcd for  $\text{C}_{15}\text{H}_{13}\text{F}_6\text{O}_2\text{S}_2$  403.0277; found  $[\text{M-H}]^-$ : 403.0269.

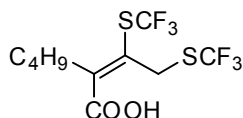

**(*E*)-2-(1,2-Bis((trifluoromethyl)thio)ethylidene)hexanoic acid (4v)**

Compound **4v** was obtained as a colorless oil (27.3 mg, 40%), with PE/EA = 5:1 as eluent for the column chromatography.  $^1\text{H}$  NMR (400 MHz,  $\text{CDCl}_3$ )  $\delta$  7.75 (s, 1H), 4.11 (s, 2H), 2.80-2.47 (m, 2H), 1.47-1.24 (m, 4H), 0.86 (t,  $J$  = 7.2 Hz, 3H).  $^{19}\text{F}$  NMR (377 MHz,  $\text{CDCl}_3$ )  $\delta$  -38.7 (s, 3F), -40.9 (s, 3F).  $^{13}\text{C}$  NMR (101 MHz,  $\text{CDCl}_3$ )  $\delta$  170.8, 147.2, 130.2, 129.4 (q,  $J$  = 306.9 Hz), 128.1 (q,  $J$  = 310.4 Hz), 34.2, 32.3, 29.3, 21.4, 12.7. IR (KBr):  $\nu$  2953, 2921, 2846, 1681, 1260, 1100, 905, 796, 657  $\text{cm}^{-1}$ . MS (ESI)  $m/z$ : 341  $[\text{M-H}]^-$ . HRMS (ESI)  $m/z$ : Calcd for  $\text{C}_{10}\text{H}_{11}\text{F}_6\text{O}_2\text{S}_2$  341.0110; found  $[\text{M-H}]^-$ : 341.0104.

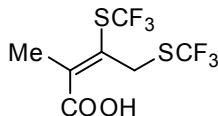

**(*E*)-2-Methyl-3,4-bis((trifluoromethyl)thio)but-2-enoic acid (4w)**

Compound **4w** was obtained as a colorless oil (31.4 mg, 48%), with PE/EA = 5:1 as eluent for the column chromatography.  $^1\text{H}$  NMR (400 MHz,  $\text{CDCl}_3$ )  $\delta$  8.03 (s, 1H), 4.19 (s, 2H), 2.27 (s, 3H).  $^{19}\text{F}$  NMR (377 MHz,  $\text{CDCl}_3$ )  $\delta$  -39.1 (s, 3F), -41.2 (s, 3F).

$^{13}\text{C}$  NMR (101 MHz,  $\text{CDCl}_3$ )  $\delta$  170.3, 142.3, 132.2 (d,  $J = 1.1$  Hz), 129.4 (q,  $J = 307.4$  Hz), 128.3 (q,  $J = 310.4$  Hz), 34.5, 19.0. IR (KBr):  $\nu$  2960, 2927, 2859, 1703, 1278, 1103, 1007, 807, 757  $\text{cm}^{-1}$ . MS (ESI)  $m/z$ : 299  $[\text{M}-\text{H}]^-$ . HRMS (ESI)  $m/z$ : Calcd for  $\text{C}_7\text{H}_5\text{F}_6\text{O}_2\text{S}_2$  298.9641; found  $[\text{M}-\text{H}]^-$ : 298.9639.

## 6. Transformation of Compound 3a

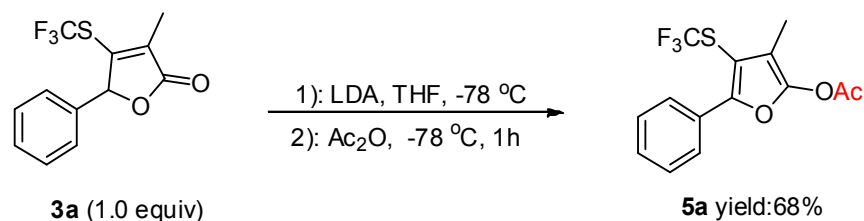

**3-Methyl-5-phenyl-4-((trifluoromethyl)thio)furan-2-yl acetate (5a):** A solution of LDA (1.5M in THF, 0.16 mL, 1.2 equiv) in THF (2.0 mL) was slowly added a solution of **3a** (54.9 mg, 0.2 mmol, 1.0 equiv) in dry THF (1.0 mL) at  $-78^\circ\text{C}$ . After the reaction mixture was stirred for 0.5 h at  $-78^\circ\text{C}$ ,  $\text{Ac}_2\text{O}$  (40.9 mg, 0.4 mmol, 2.0 equiv) was added slowly. The mixture was stirred at  $-78^\circ\text{C}$  for 1 h. Then, saturated ammonium chloride aqueous solution was added. The resulting mixture was eluted with ethyl acetate. The organic phase was washed with brine, dried over  $\text{Na}_2\text{SO}_4$ , filtered, and concentrated under reduced vacuum. The residue was purified with silica gel column chromatography (PE/EA = 40:1) to give product **5a** as a yellow oil (42.9 mg, 68% yield).  $^1\text{H}$  NMR (400 MHz,  $\text{CDCl}_3$ )  $\delta$  7.89 (d,  $J = 7.3$  Hz, 2H), 7.38-7.27 (m, 3H), 2.29 (s, 3H), 1.90 (s, 3H).  $^{19}\text{F}$  NMR (377 MHz,  $\text{CDCl}_3$ )  $\delta$  -42.8 (s, 3F).  $^{13}\text{C}$  NMR (101 MHz,  $\text{CDCl}_3$ )  $\delta$  166.4, 145.5, 141.6, 127.9, 127.5, 127.4, 127.2, 126.2 (q,  $J = 310.0$  Hz), 125.6, 107.8, 34.8, 19.2. IR (KBr):  $\nu$  2968, 2922, 2840, 1767, 1531, 1432, 1267, 1139, 1100, 1014, 843, 793, 697, 565  $\text{cm}^{-1}$ . MS (ESI)  $m/z$ : 317  $[\text{M}+\text{H}]^+$ . HRMS (ESI)  $m/z$ : Calcd for  $\text{C}_{14}\text{H}_{12}\text{F}_3\text{O}_3\text{S}$  317.0454; found  $[\text{M}+\text{H}]^+$ : 317.0453.

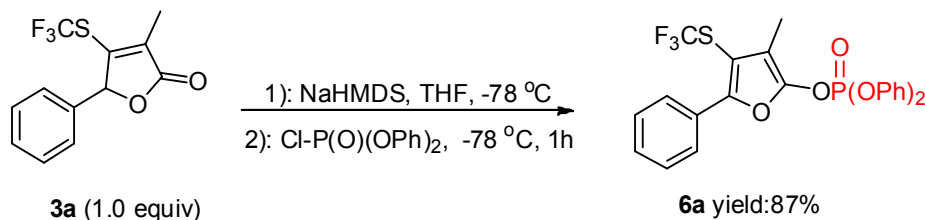

**3-Methyl-5-phenyl-4-((trifluoromethyl)thio)furan-2-yl diphenyl phosphate (6a):** A solution of NaHMDS (2.0 M in THF, 0.12 mL, 1.2 equiv) in THF (2.0 mL) was slowly added a solution of **3a** (54.9 mg, 0.2 mmol, 1.0 equiv) in dry THF (1.0 mL) at  $-78^\circ\text{C}$ . After the reaction mixture was stirred for 0.5 h at  $-78^\circ\text{C}$ , aqueous  $\text{Cl-P(O)(OPh)}_2$  (88.1 mg, 0.4 mmol, 2.0 equiv) solution was added slowly. The mixture was stirred at  $-78^\circ\text{C}$  for 1 h. Then, saturated ammonium chloride aqueous solution was added. The resulting mixture was eluted with ethyl acetate. The organic phase was washed with brine, dried over  $\text{Na}_2\text{SO}_4$ , filtered, and concentrated under

reduced vacuum. The residue was purified with silica gel column chromatography (PE/EA = 20:1) to give product **6a** as a yellow oil (107.5 mg, 87% yield).  $^1\text{H}$  NMR (400 MHz,  $\text{CDCl}_3$ )  $\delta$  7.82-7.76 (m, 2H), 7.35-7.26 (m, 7H), 7.25-7.14 (m, 6H), 1.86 (d,  $J = 2.5$  Hz, 3H).  $^{19}\text{F}$  NMR (377 MHz,  $\text{CDCl}_3$ )  $\delta$  -42.7 (s, 3F).  $^{13}\text{C}$  NMR (101 MHz,  $\text{CDCl}_3$ )  $\delta$  150.4, 149.1, 149.1, 144.6, 144.5, 129.0, 128.1 (q,  $J = 310.9$  Hz), 128.0, 127.5, 125.5, 125.1, 125.0, 119.1, 119.0, 105.3, 105.2, 102.8, 5.8.  $^{31}\text{P}$  NMR (162 MHz,  $\text{CDCl}_3$ )  $\delta$  -18.3 (s, 1P). IR (KBr):  $\nu$  2966, 2925, 2857, 1762, 1549, 1433, 1259, 1099, 1032, 845, 759, 667, 482  $\text{cm}^{-1}$ . MS (ESI)  $m/z$ : 524  $[\text{M}+\text{NH}_4]^+$ . HRMS (ESI)  $m/z$ : Calcd for  $\text{C}_{24}\text{H}_{12}\text{F}_3\text{NO}_5\text{PS}$  524.0900; found  $[\text{M}+\text{NH}_4]^+$ : 524.0900.

## 7. Mechanistic Investigation.

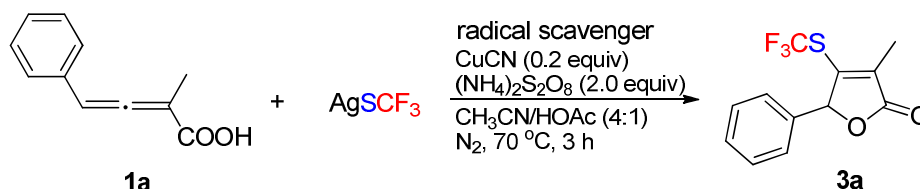

### The experimental procedures for radical capture with 1,4-benzoquinone:

2-Methyl-4-phenylbuta-2,3-dienoic acid **1a** (34.8 mg, 0.2 mmol, 1.0 equiv), CuCN (3.6 mg, 0.04 mmol, 0.2 equiv), AgSCF<sub>3</sub> (83.6 mg, 0.4 mmol, 2.0 equiv), (NH<sub>4</sub>)<sub>2</sub>S<sub>2</sub>O<sub>8</sub> (91.3 mg, 0.4 mmol, 2.0 equiv), and 1,4-benzoquinone (21.6 mg, 0.2 mmol, 1.0 equiv) were added to a Schlenk tube. The tube was sealed with a septum, evacuated, and backfilled with nitrogen three times. Then CH<sub>3</sub>CN (3.2 mL) and HOAc (0.8 mL) was added by a syringe. The mixture was stirred at 70 °C for 3 h. Only trace of the desired product **3a** was detected.

### The experimental procedures for radical capture with BHT:

2-Methyl-4-phenylbuta-2,3-dienoic acid **1a** (34.8 mg, 0.2 mmol, 1.0 equiv), CuCN (3.6 mg, 0.04 mmol, 0.2 equiv), AgSCF<sub>3</sub> (83.6 mg, 0.4 mmol, 2.0 equiv), (NH<sub>4</sub>)<sub>2</sub>S<sub>2</sub>O<sub>8</sub> (91.3 mg, 0.4 mmol, 2.0 equiv), and BHT (40.5 mg, 0.2 mmol, 1.0 equiv) were added to a Schlenk tube. The tube was sealed with a septum, evacuated, and backfilled with nitrogen three times. Then CH<sub>3</sub>CN (3.2 mL) and HOAc (0.8 mL) was added by a syringe. The mixture was stirred at 70 °C for 3 h. Only trace of the desired product **3a** was detected.

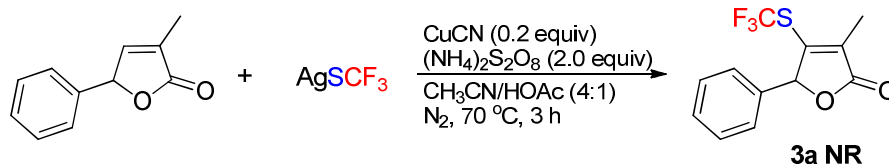

3-Methyl-5-phenylfuran-2(5H)-one (34.8 mg, 0.2 mmol, 1.0 equiv), CuCN (3.6 mg, 0.04 mmol, 0.2 equiv), AgSCF<sub>3</sub> (83.6 mg, 0.4 mmol, 2.0 equiv) and (NH<sub>4</sub>)<sub>2</sub>S<sub>2</sub>O<sub>8</sub> (91.3 mg, 0.4 mmol, 2.0 equiv) were added to a Schlenk tube. The tube was sealed

with a septum, evacuated, and backfilled with nitrogen three times. Then CH<sub>3</sub>CN (3.2 mL) and HOAc (0.8 mL) was added by a syringe. The mixture was stirred at 70 °C for 3 h. The desired product **3a** was not detected.

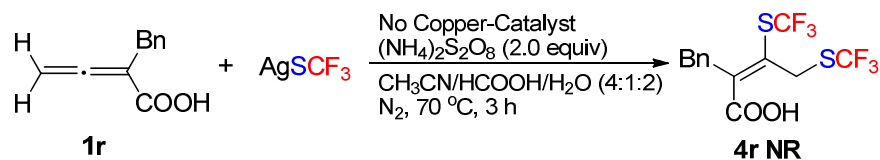

2-Benzylbuta-2,3-dienoic acid **1r** (34.8 mg, 0.2 mmol, 1.0 equiv), AgSCF<sub>3</sub> (125.3 mg, 0.6 mmol, 3.0 equiv) and (NH<sub>4</sub>)<sub>2</sub>S<sub>2</sub>O<sub>8</sub> (136.9 mg, 0.6 mmol, 3.0 equiv) were added to a Schlenk tube. The tube was sealed with a septum, evacuated, and backfilled with nitrogen three times. Then CH<sub>3</sub>CN (3.2 mL), HCOOH (0.8 mL) and H<sub>2</sub>O (1.6 mL) was added by a syringe. The mixture was stirred at 70 °C for 3 h. The desired product **4r** was not detected.

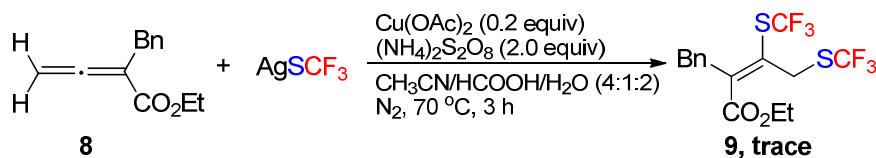

A 25 mL Schlenk tube equipped with a magnetic stir bar was charged with **8** (40.4 mg, 0.2 mmol, 1.0 equiv), Cu(OAc)<sub>2</sub> (7.3 mg, 0.04 mmol, 0.2 equiv), AgSCF<sub>3</sub> (125.4 mg, 0.6 mmol, 3.0 equiv), and (NH<sub>4</sub>)<sub>2</sub>S<sub>2</sub>O<sub>8</sub> (136.9 mg, 0.6 mmol, 3.0 equiv). The tube was sealed with a septum, evacuated, and backfilled with nitrogen three times. Then CH<sub>3</sub>CN (3.2 mL), HCOOH (0.8 mL) and H<sub>2</sub>O (1.6 mL) were added by a syringe. The mixture was stirred at 70 °C for 3 h. Only trace of the desired product **9** was detected.

## 8. Copies of $^1\text{H}$ , $^{19}\text{F}$ , and $^{13}\text{C}$ NMR Spectra for the Products

$^1\text{H}$  NMR spectrum of **1d** in DMSO

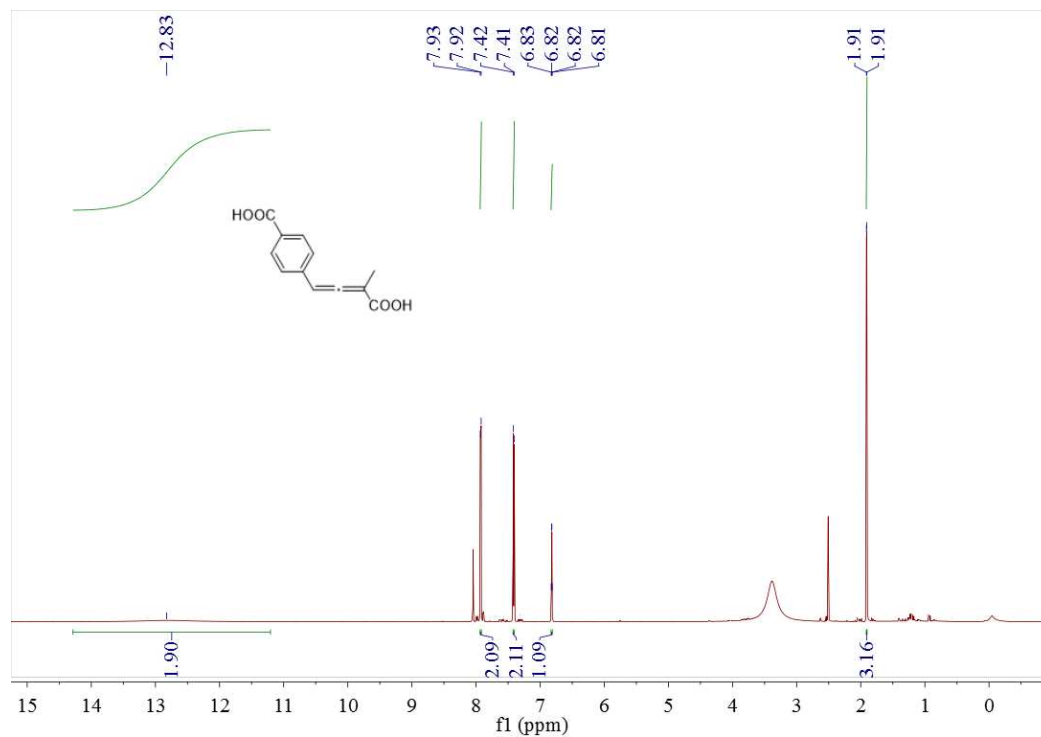

$^{13}\text{C}$  NMR spectrum of **1d** in DMSO

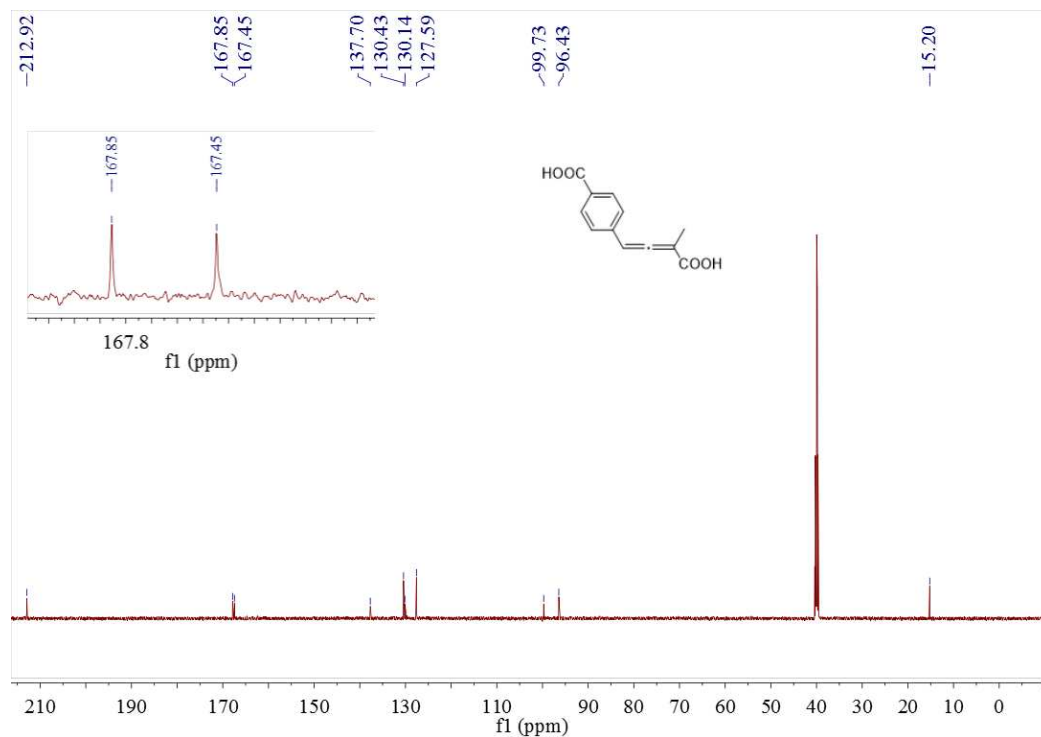

$^1\text{H}$  NMR spectrum of **1e** in  $\text{CDCl}_3$

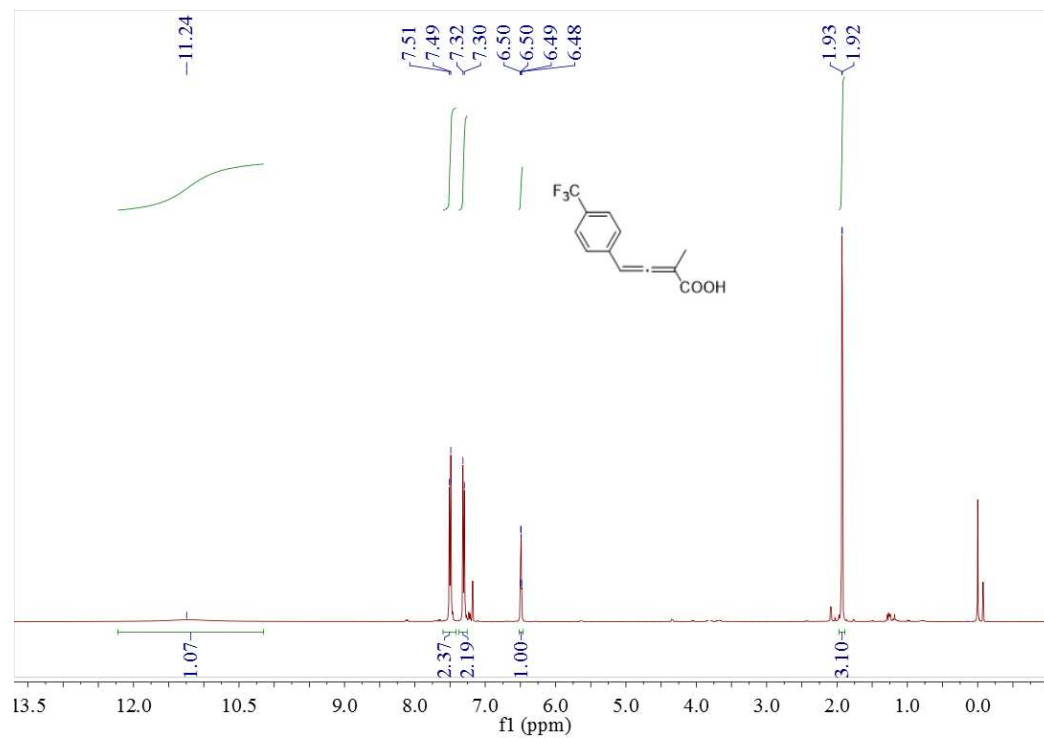

$^{19}\text{F}$  NMR spectrum of **1e** in  $\text{CDCl}_3$

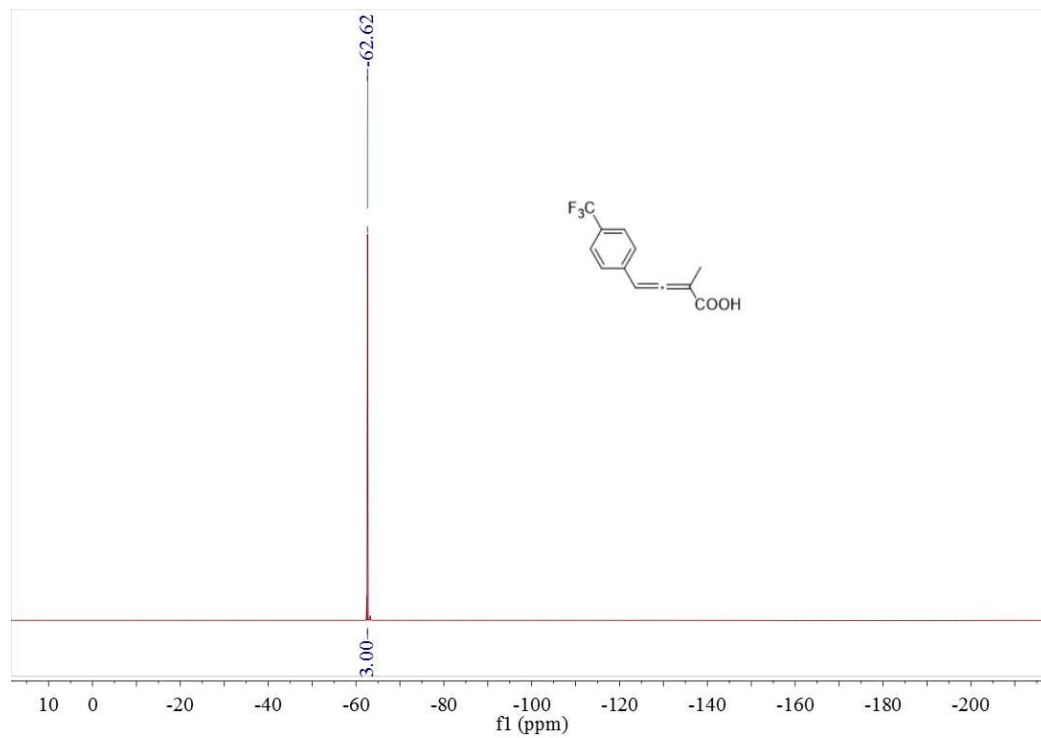

$^{13}\text{C}$  NMR spectrum of **1e** in  $\text{CDCl}_3$

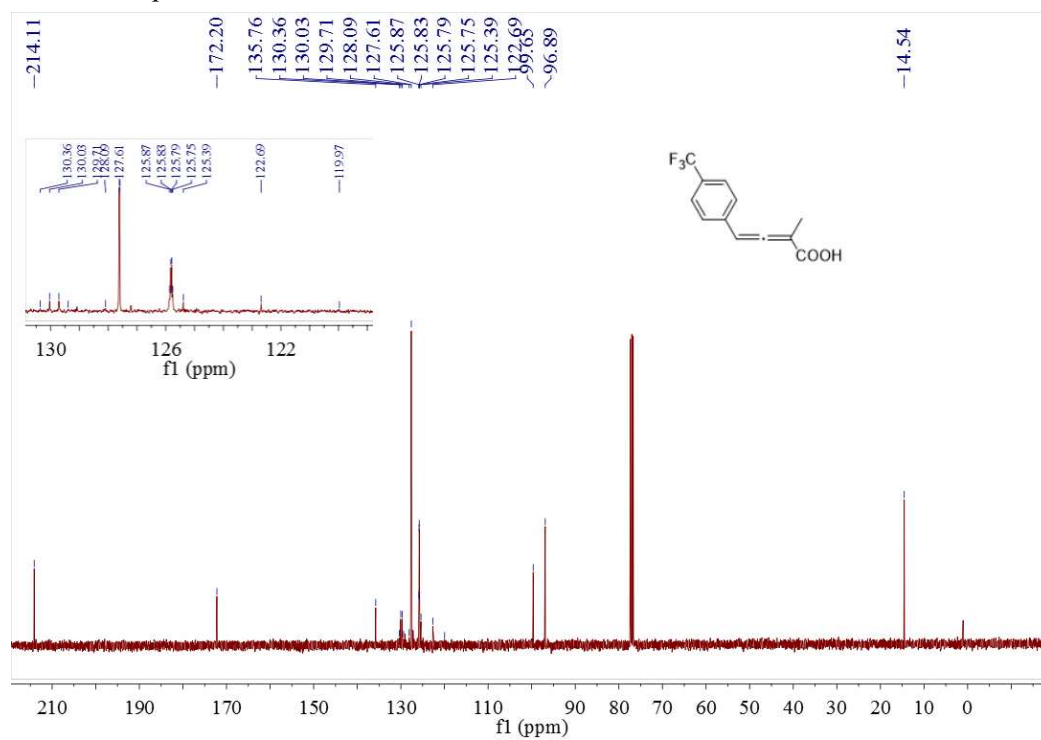

$^1\text{H}$  NMR spectrum of **1i** in  $\text{CDCl}_3$

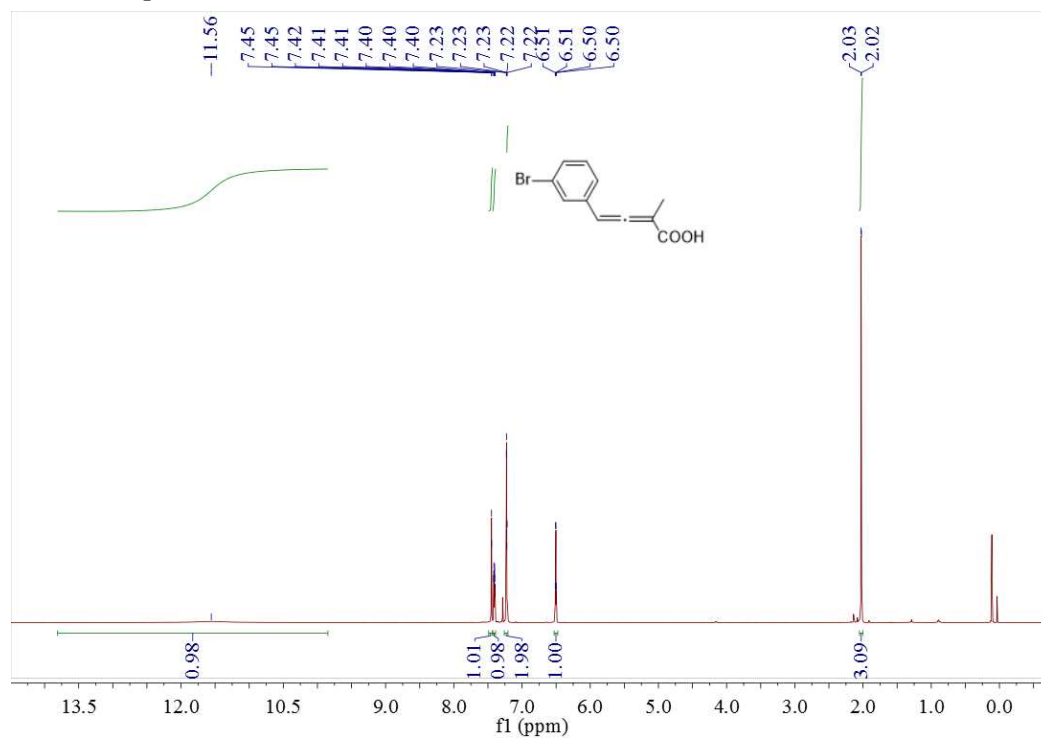

$^{13}\text{C}$  NMR spectrum of **1i** in  $\text{CDCl}_3$

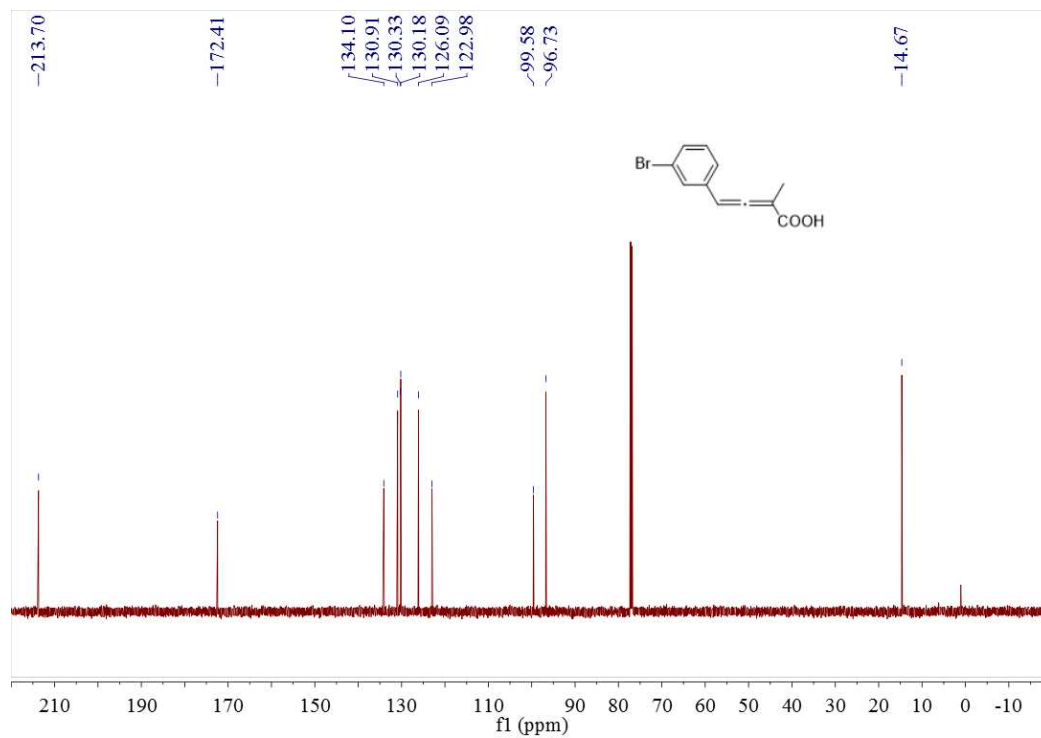

$^1\text{H}$  NMR spectrum of **1j** in  $\text{CDCl}_3$

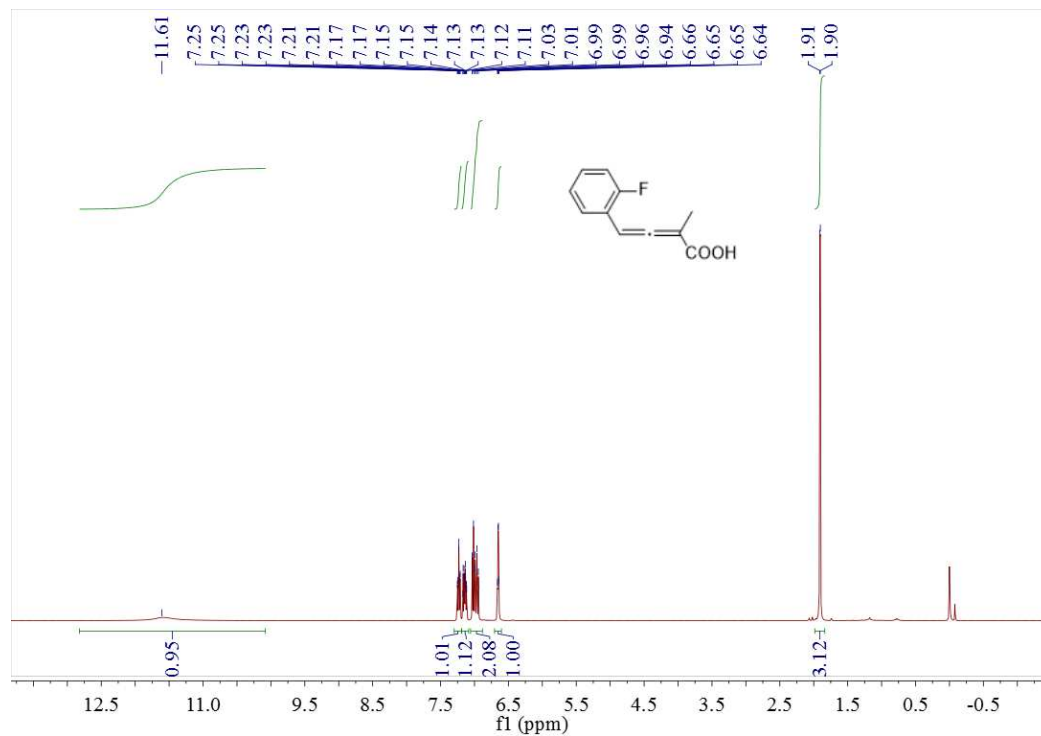



$^{19}\text{F}$  NMR spectrum of **1j** in  $\text{CDCl}_3$

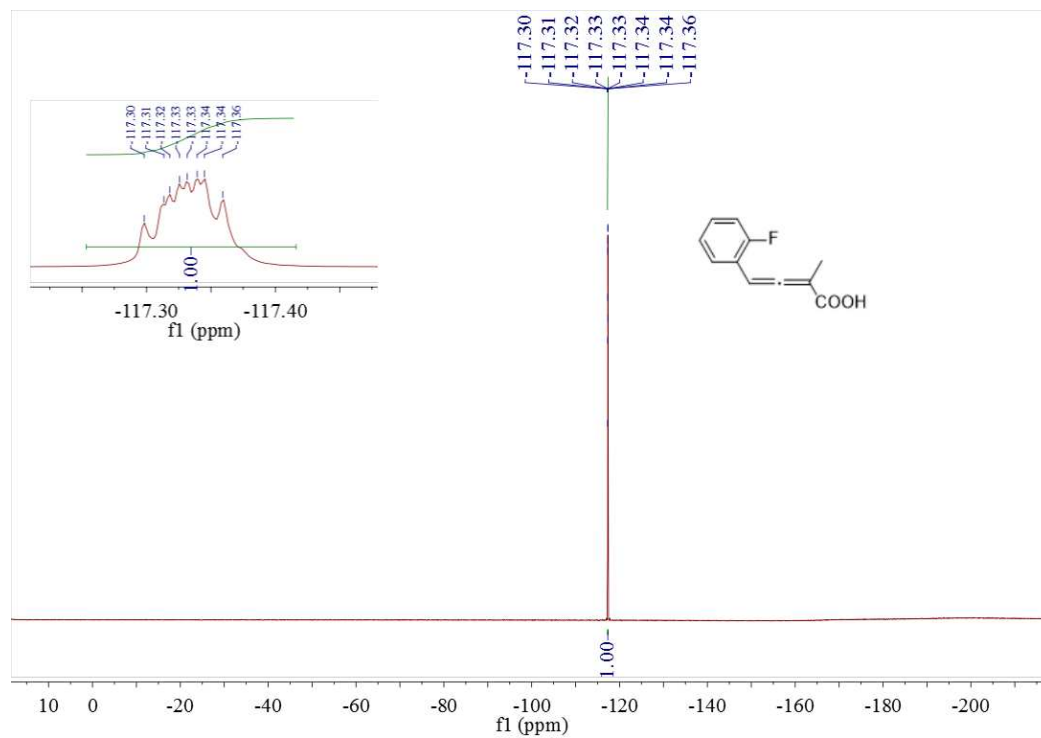

$^{13}\text{C}$  NMR spectrum of **1j** in  $\text{CDCl}_3$

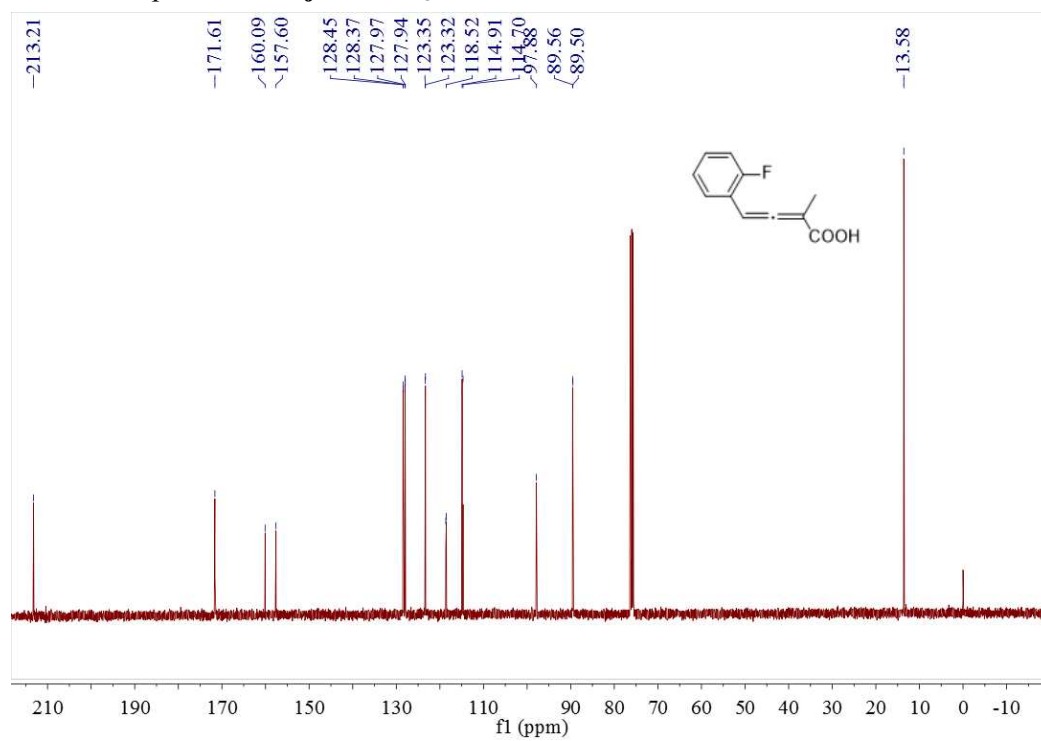

$^1\text{H}$  NMR spectrum of **1k** in  $\text{CDCl}_3$

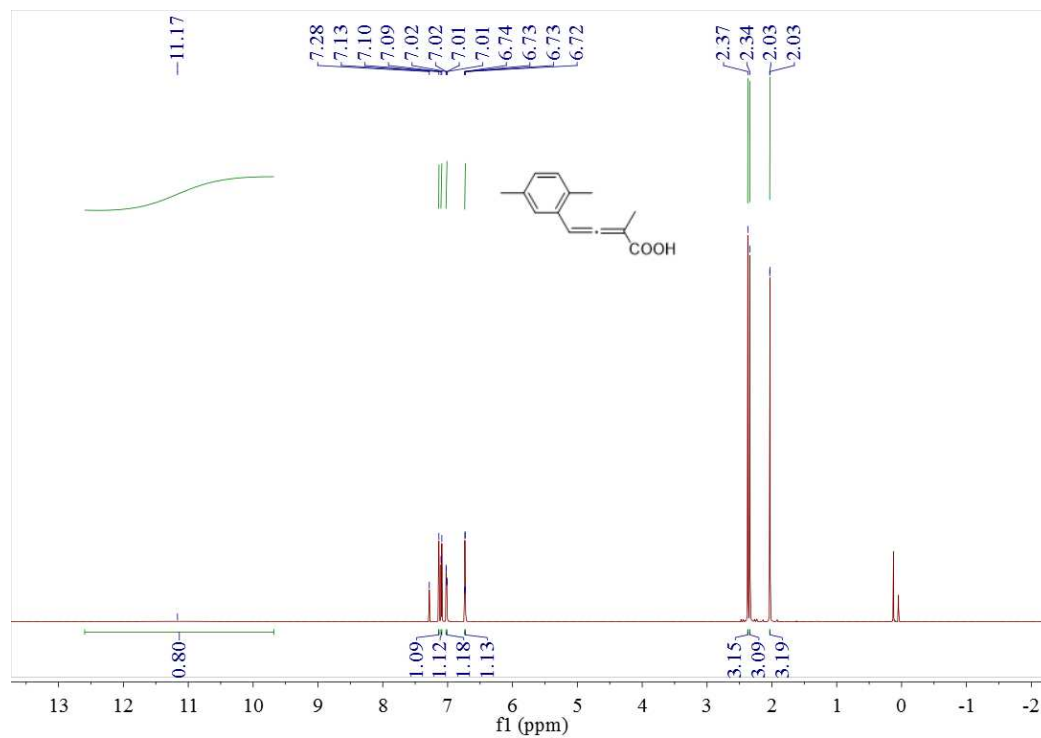

$^{13}\text{C}$  NMR spectrum of **1k** in  $\text{CDCl}_3$

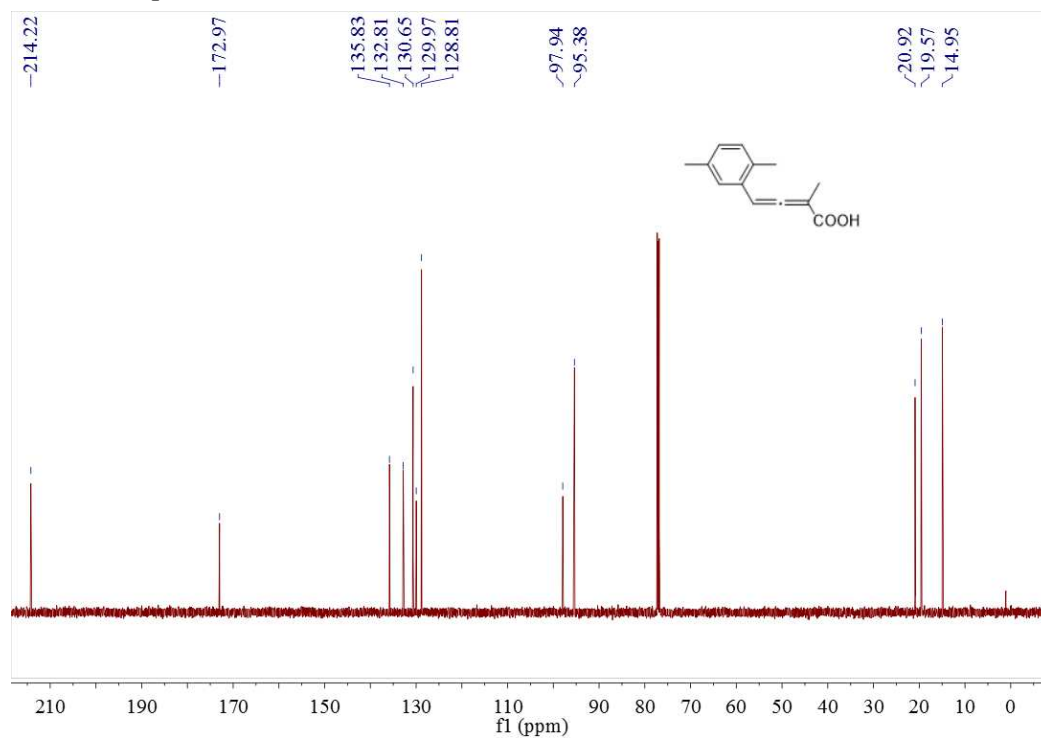

$^1\text{H}$  NMR spectrum of **11** in  $\text{CDCl}_3$

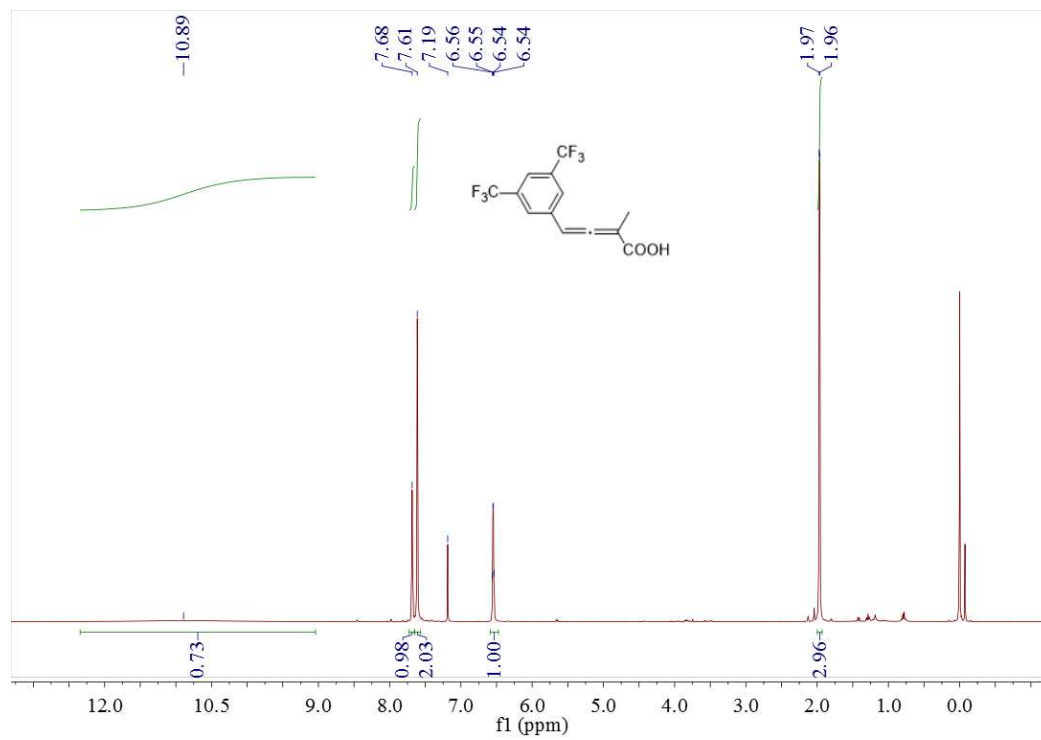

$^{19}\text{F}$  NMR spectrum of **11** in  $\text{CDCl}_3$

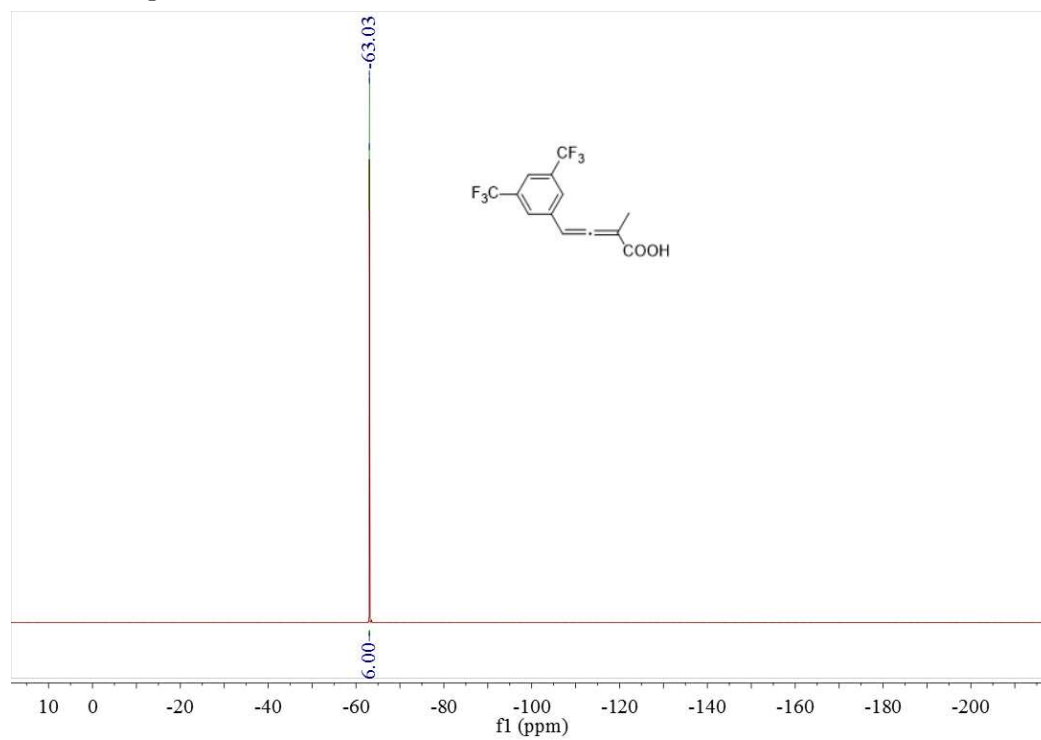

$^{13}\text{C}$  NMR spectrum of **1l** in  $\text{CDCl}_3$

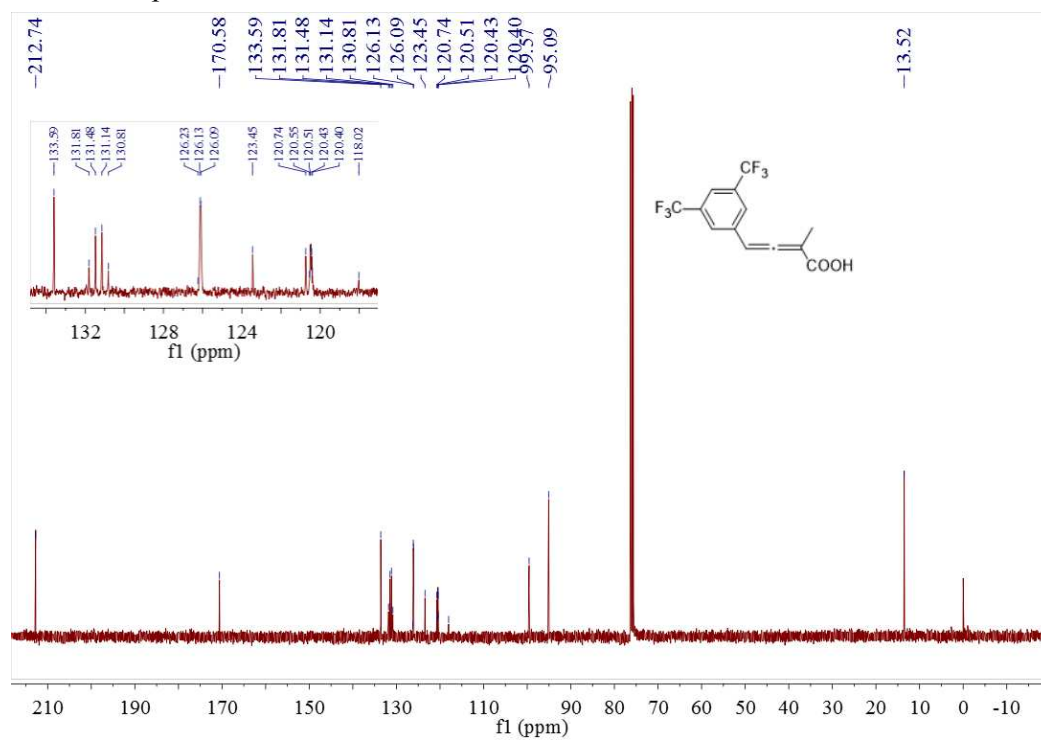

$^1\text{H}$  NMR spectrum of **1u** in  $\text{CDCl}_3$

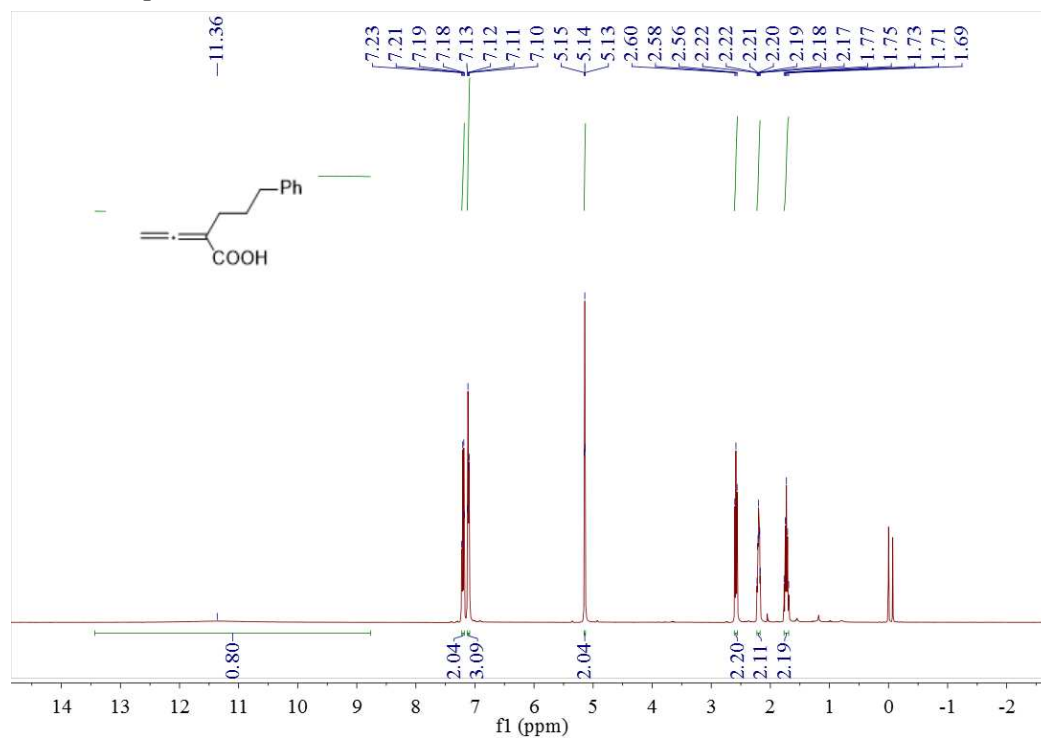

$^{13}\text{C}$  NMR spectrum of **1u** in  $\text{CDCl}_3$

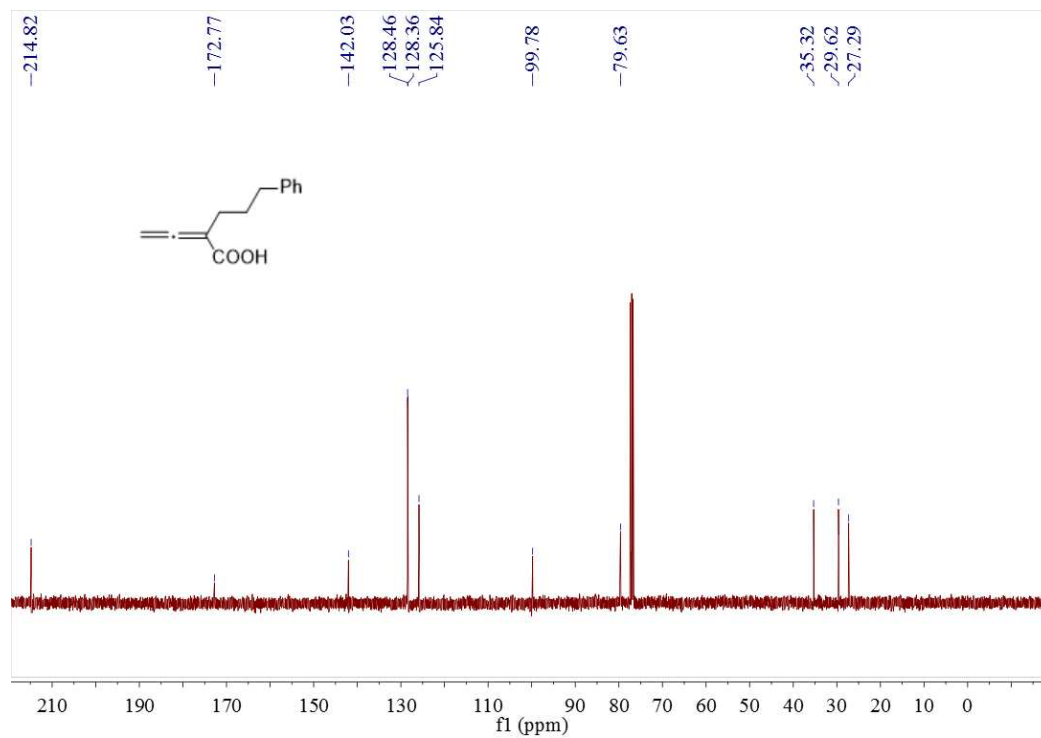

$^1\text{H}$  NMR spectrum of **3a** in  $\text{CDCl}_3$

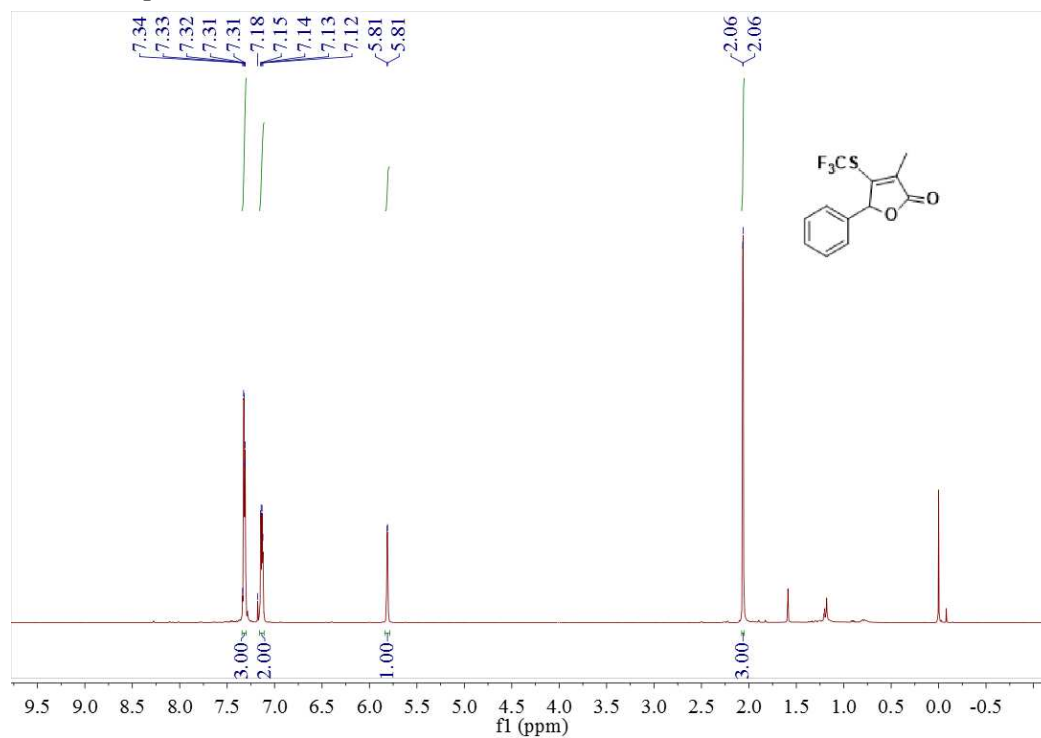

$^{19}\text{F}$  NMR spectrum of **3a** in  $\text{CDCl}_3$

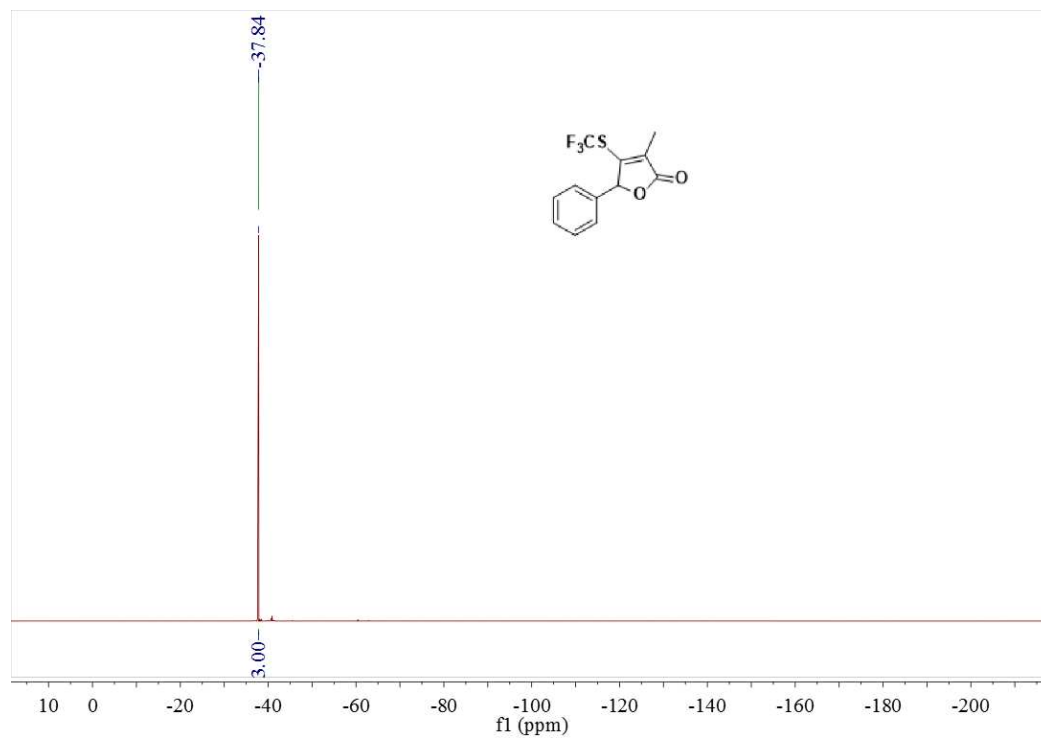

$^{13}\text{C}$  NMR spectrum of **3a** in  $\text{CDCl}_3$

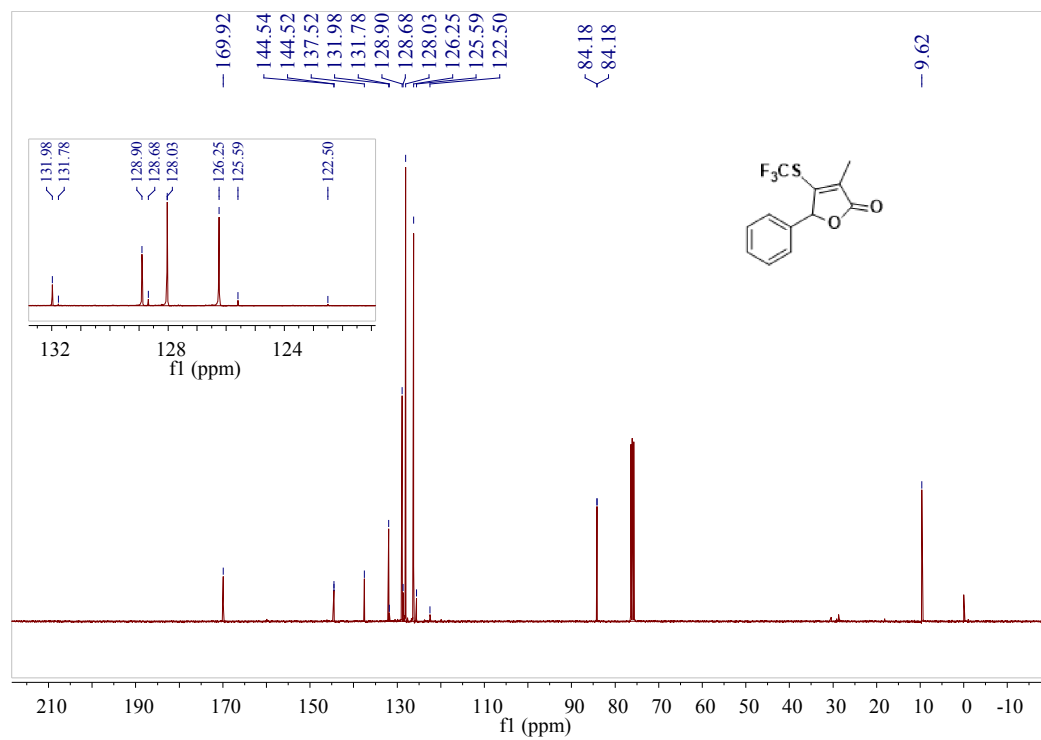

<sup>1</sup>H NMR spectrum of **3b** in CDCl<sub>3</sub>

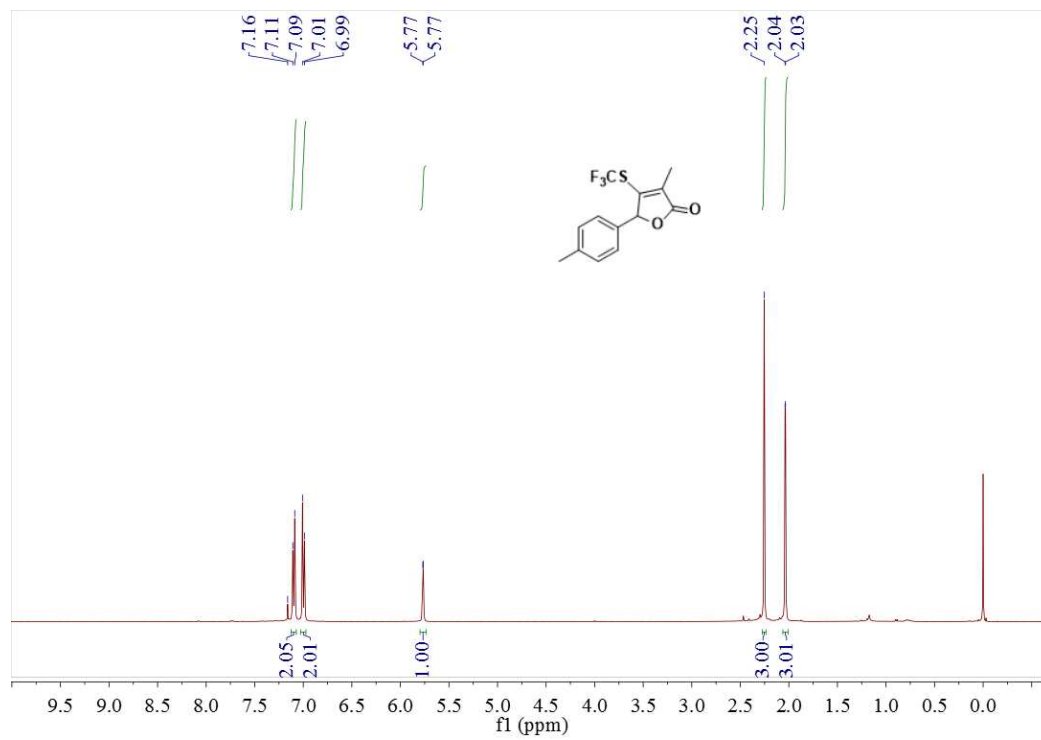

<sup>19</sup>F NMR spectrum of **3b** in CDCl<sub>3</sub>

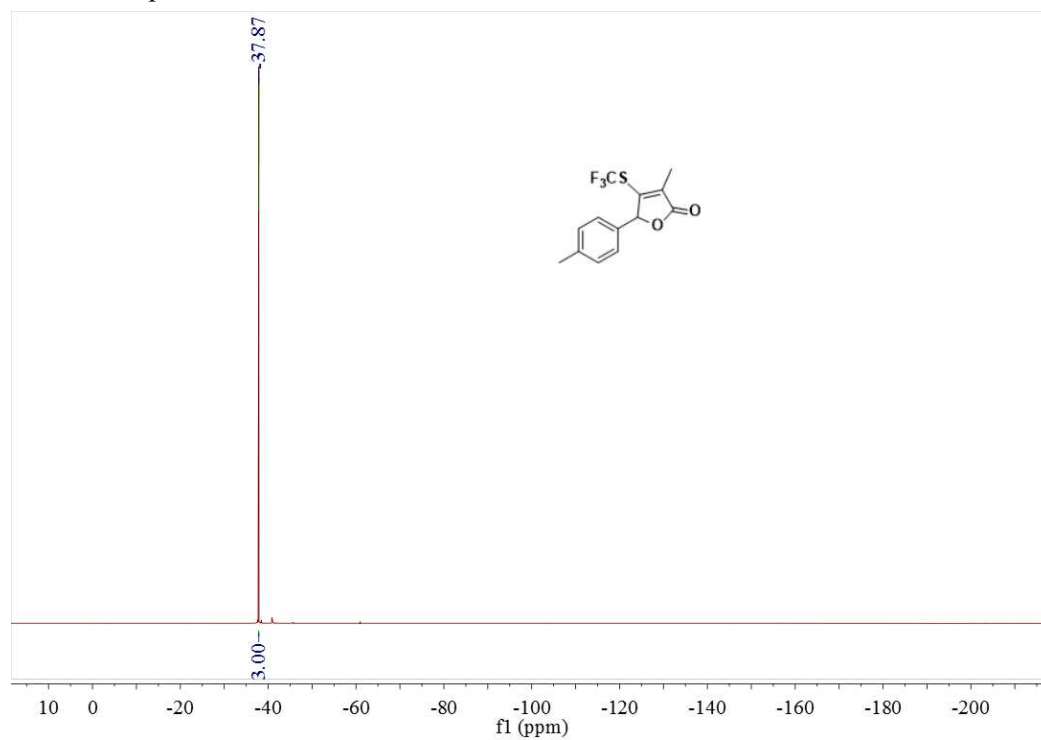

$^{13}\text{C}$  NMR spectrum of **3b** in  $\text{CDCl}_3$

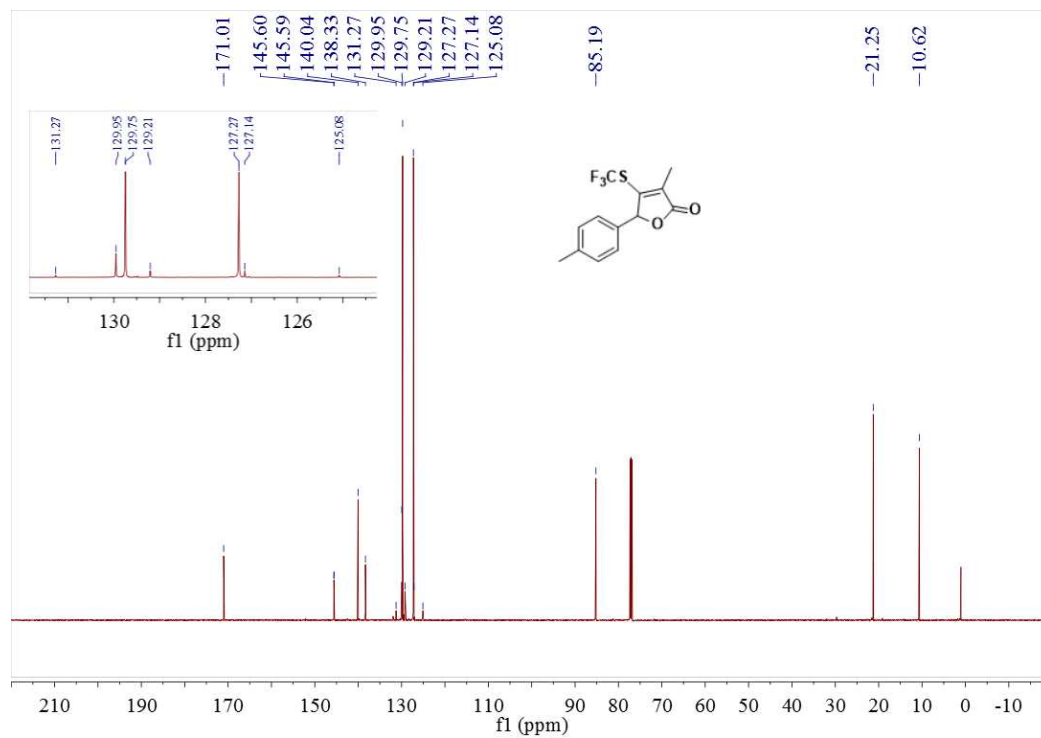

$^1\text{H}$  NMR spectrum of **3c** in  $\text{CDCl}_3$

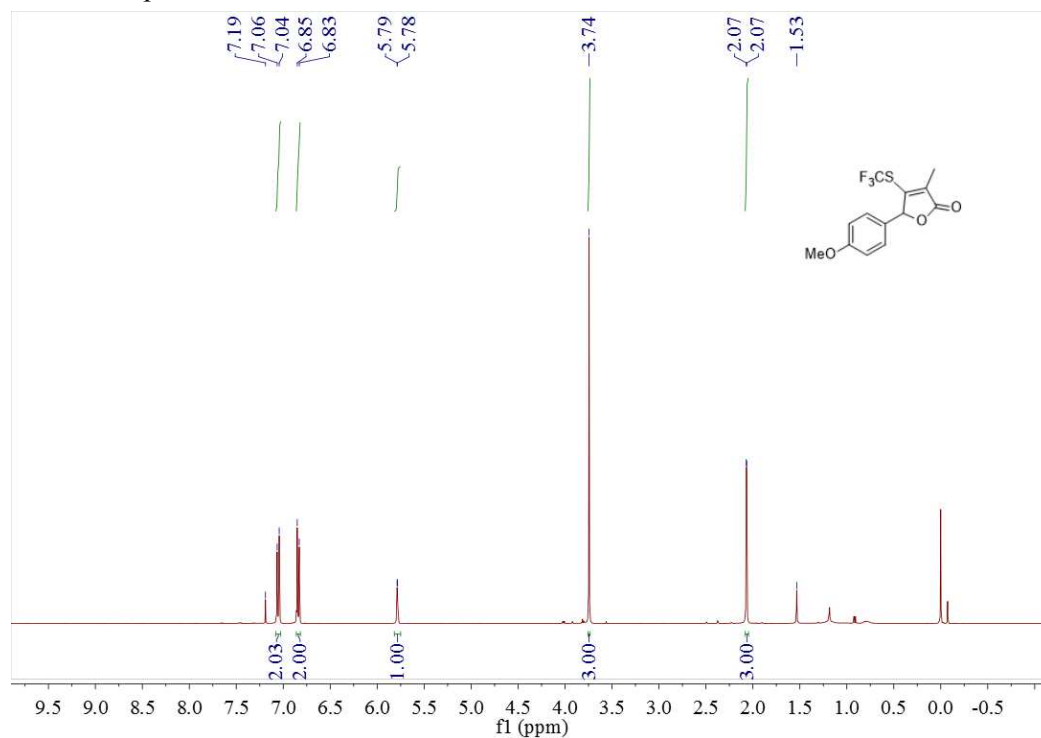



$^{19}\text{F}$  NMR spectrum of **3c** in  $\text{CDCl}_3$

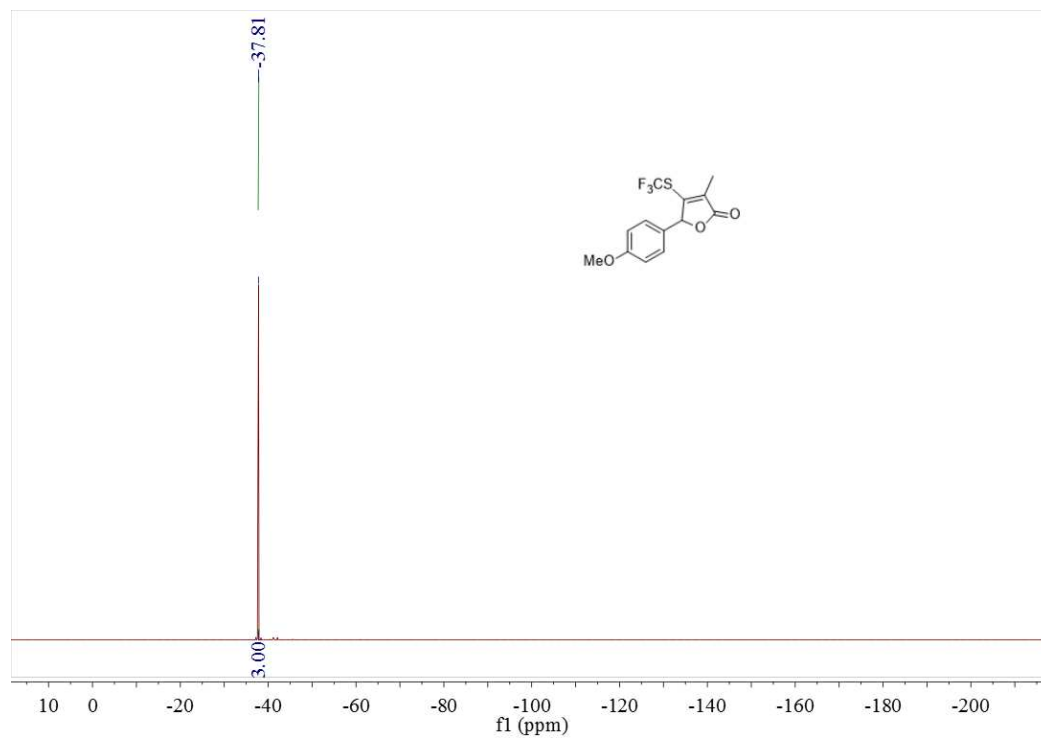

$^{13}\text{C}$  NMR spectrum of **3c** in  $\text{CDCl}_3$

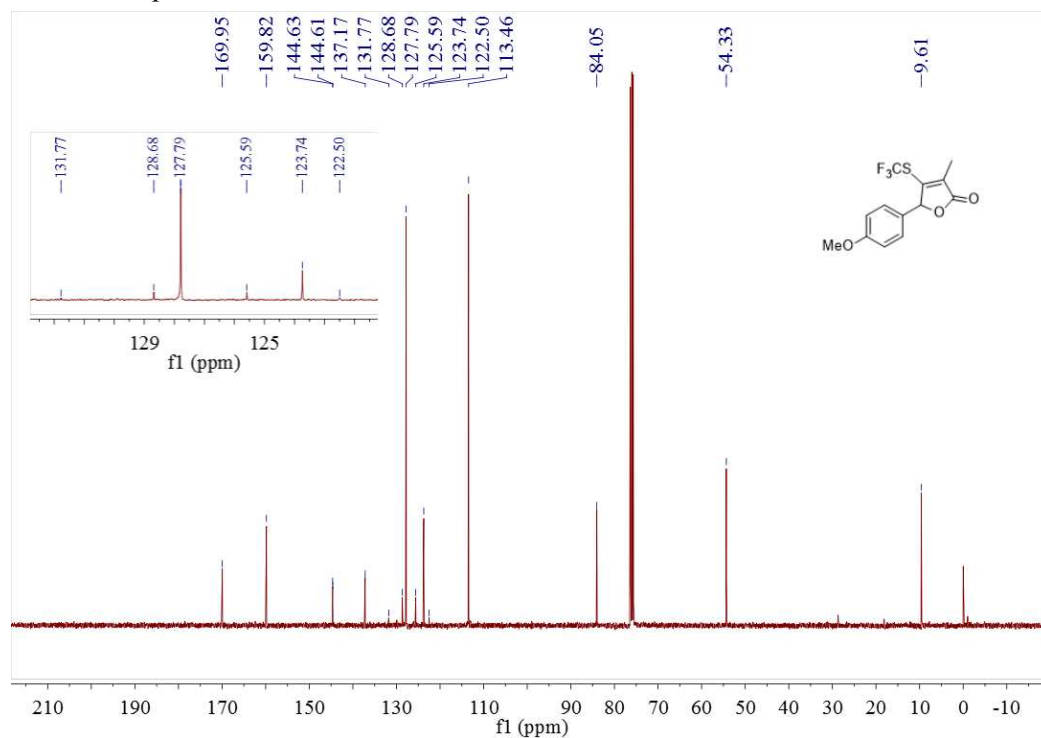

$^1\text{H}$  NMR spectrum of **3d** in  $\text{CDCl}_3$

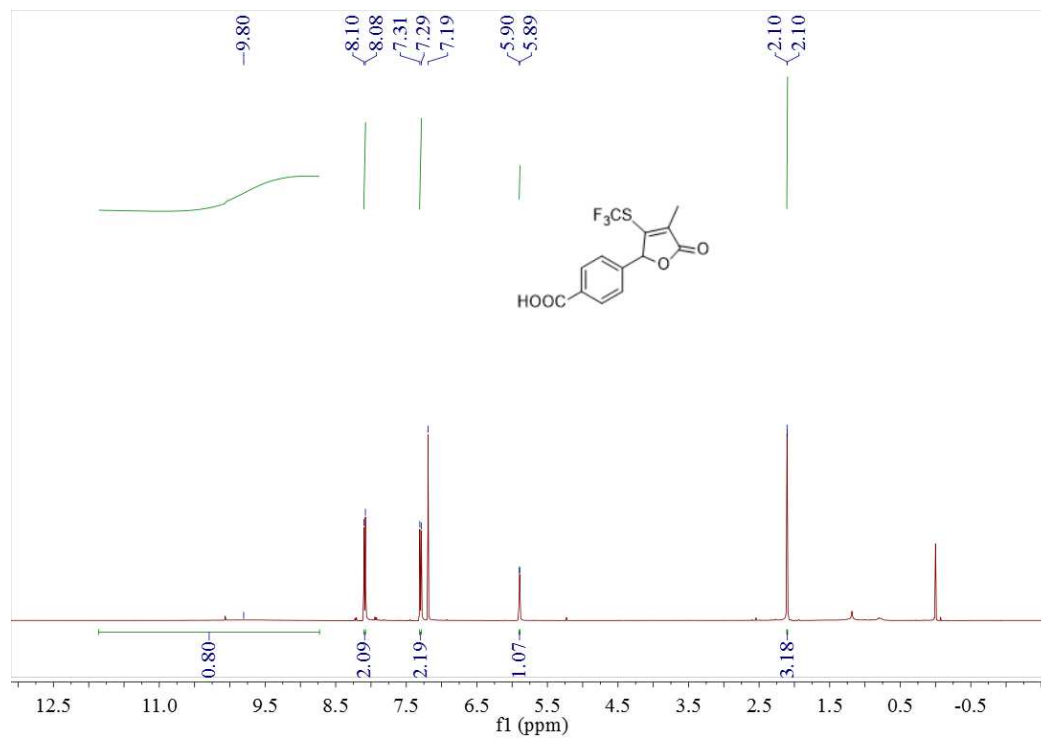

$^{19}\text{F}$  NMR spectrum of **3d** in  $\text{CDCl}_3$

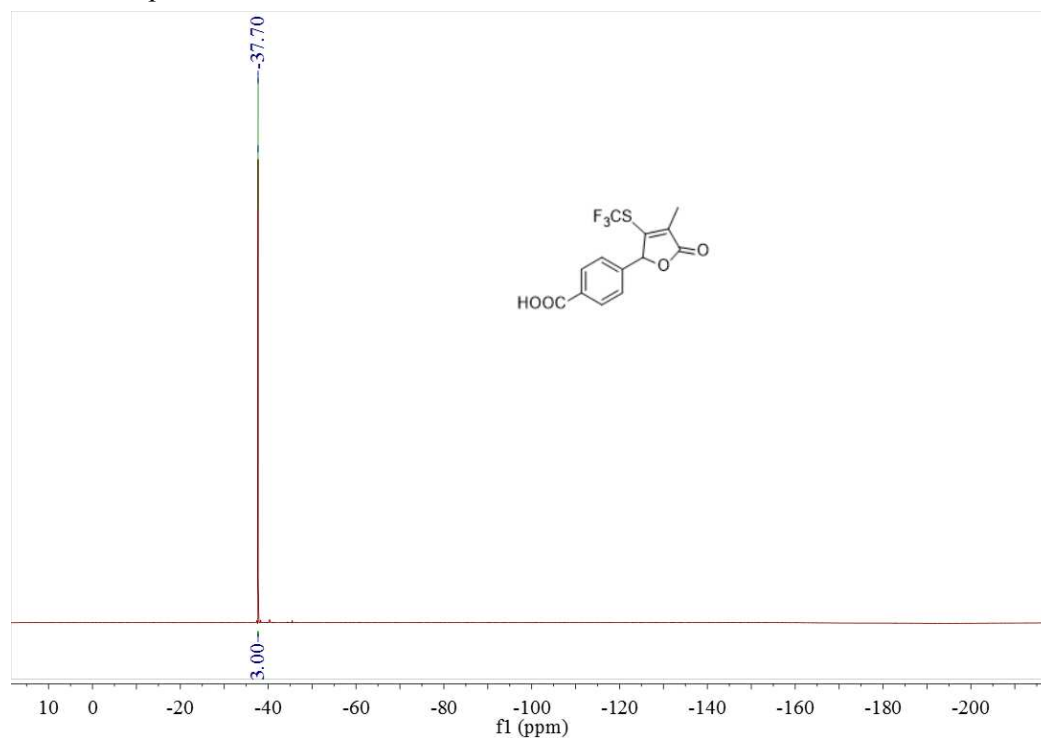

$^{13}\text{C}$  NMR spectrum of **3d** in  $\text{CDCl}_3$

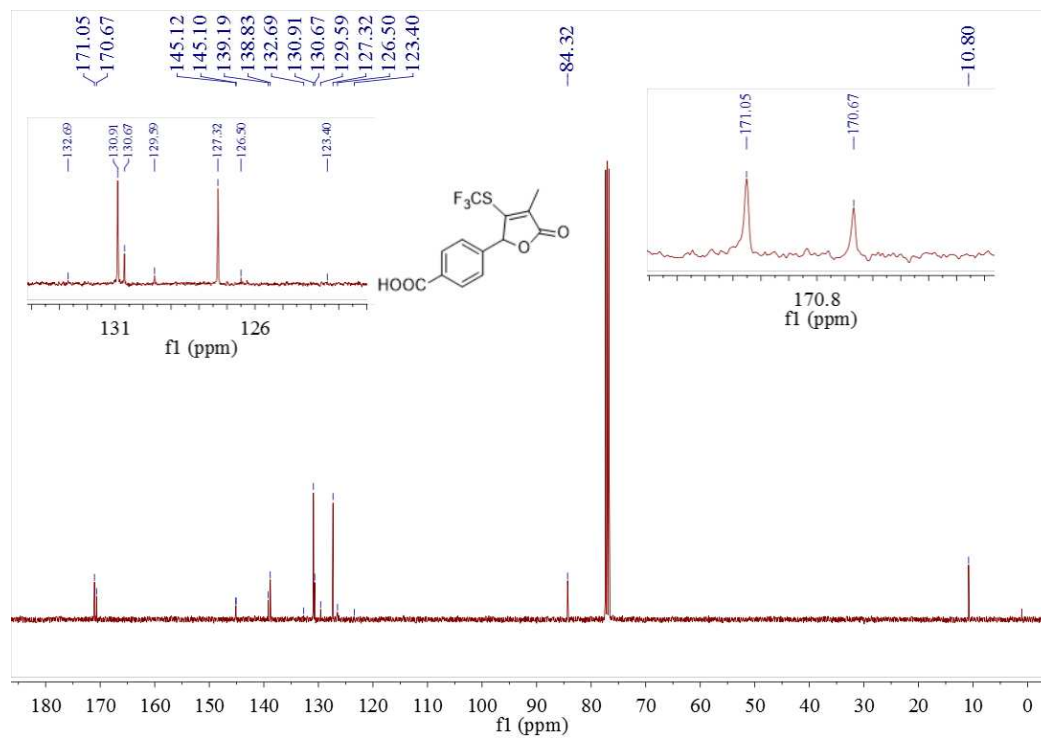

$^1\text{H}$  NMR spectrum of **3e** in  $\text{CDCl}_3$

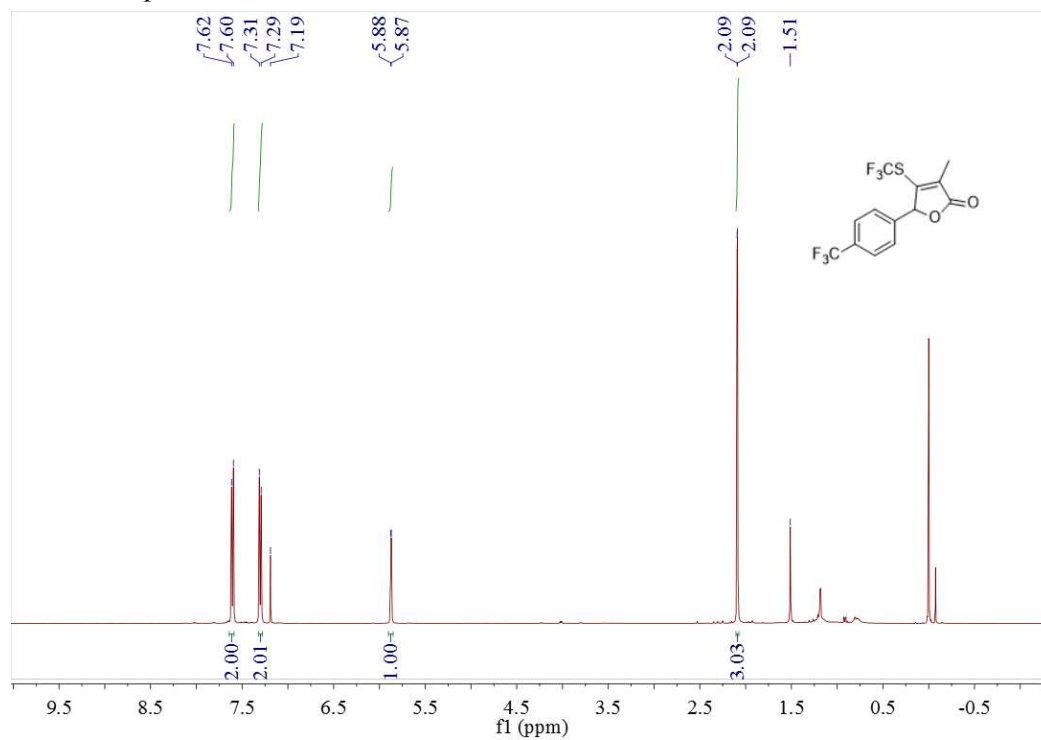

Chemical structure of 2-(4-(trifluoromethyl)phenyl)-5-(trifluoromethylthio)-2-methylisoxazol-3-one is shown above the spectrum.

| Chemical Shift (ppm) | Integration |
|----------------------|-------------|
| -37.76               | 3.07        |
| -62.89               | 3.06        |

**Chemical Structure:** CC1=C(C(F)(F)F)OC(=O)C1-c2ccc(C(F)(F)F)cc2

**<sup>13</sup>C NMR Spectrum (CDCl<sub>3</sub>):**

**Peak List (ppm):**

- 169.50
- 144.03
- 144.02
- 138.21
- 136.07
- 131.26
- 130.93
- 128.57
- 126.56
- 125.48
- 125.10
- 125.07
- 125.03
- 124.99
- 122.38
- 121.29
- 118.58
- 83.10
- 9.73

**Inset Spectrum (120-132 ppm):**

- 131.58
- 131.26
- 130.93
- 128.57
- 126.71
- 126.56
- 125.48
- 125.10
- 125.07
- 125.03
- 124.99
- 124.00
- 122.38
- 121.29
- 118.58

$^1\text{H}$  NMR spectrum of **3f** in  $\text{CDCl}_3$

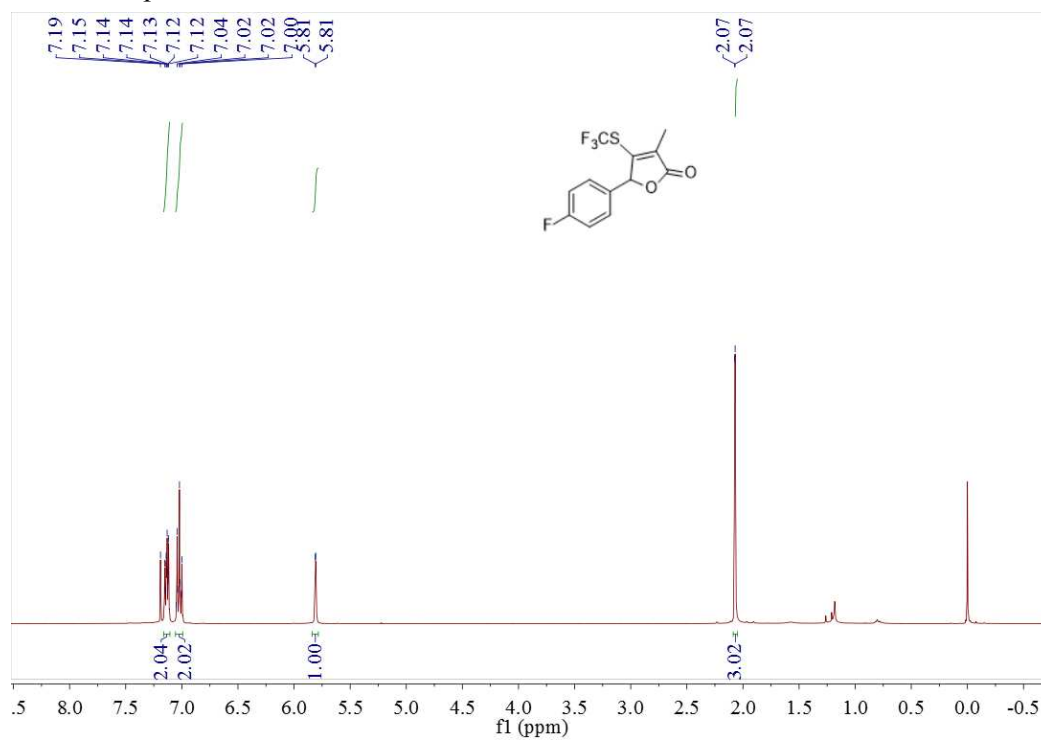

$^{19}\text{F}$  NMR spectrum of **3f** in  $\text{CDCl}_3$

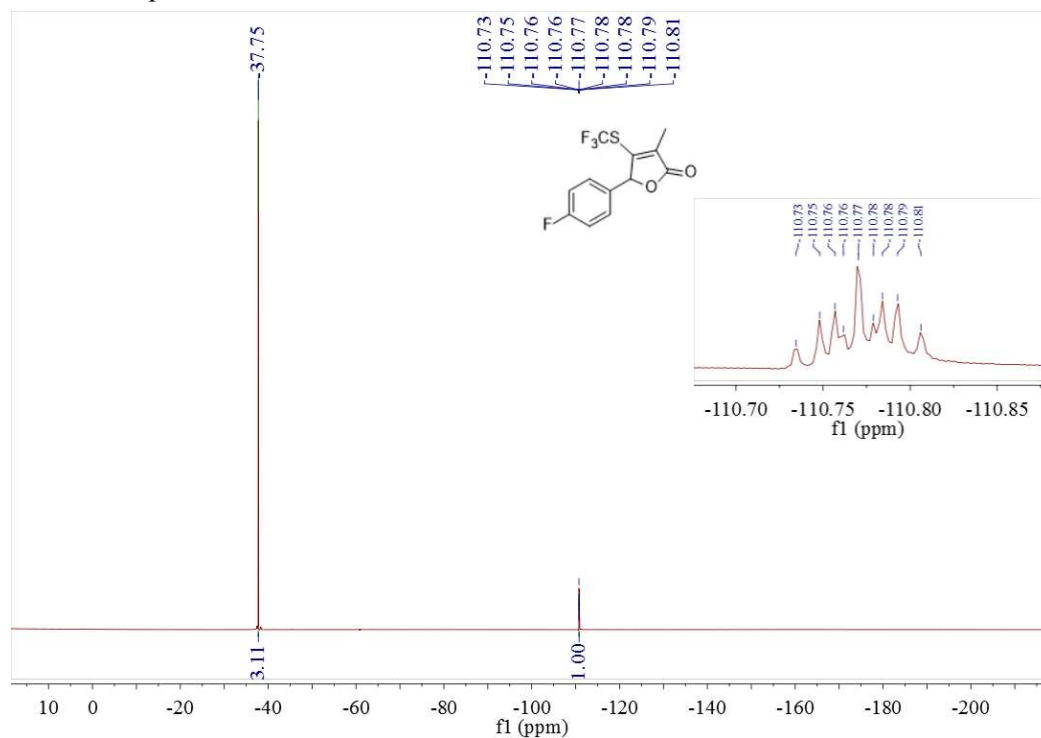

$^{13}\text{C}$  NMR spectrum of **3f** in  $\text{CDCl}_3$

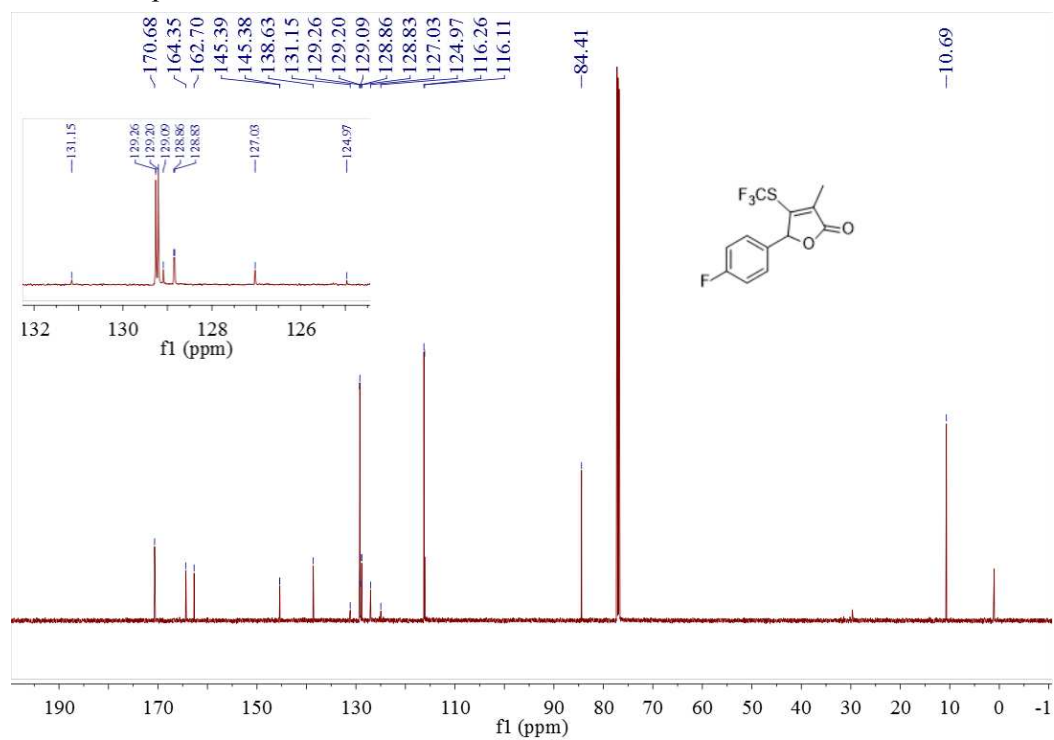

$^1\text{H}$  NMR spectrum of **3g** in  $\text{CDCl}_3$

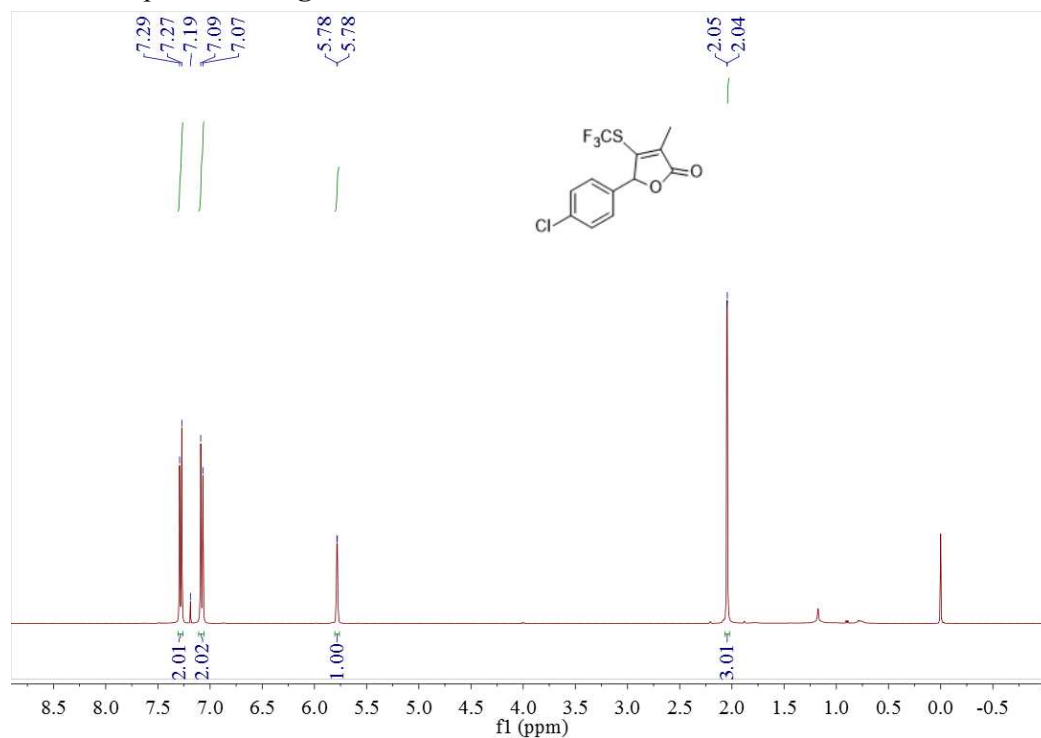

$^{19}\text{F}$  NMR spectrum of **3g** in  $\text{CDCl}_3$

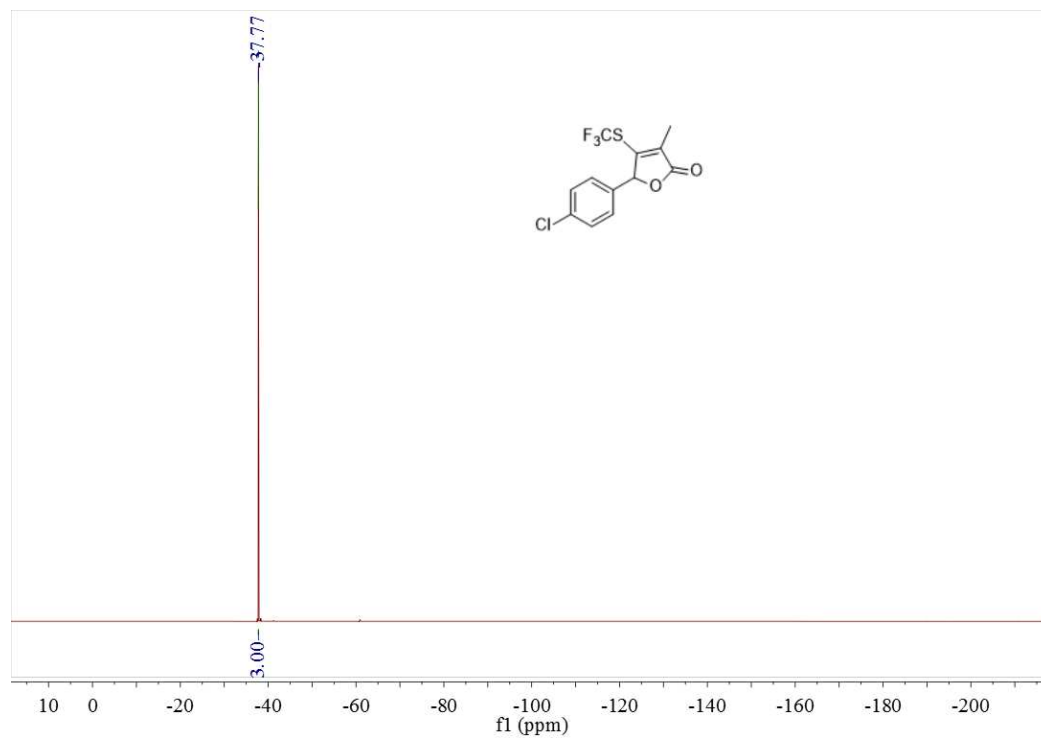

$^{13}\text{C}$  NMR spectrum of **3g** in  $\text{CDCl}_3$

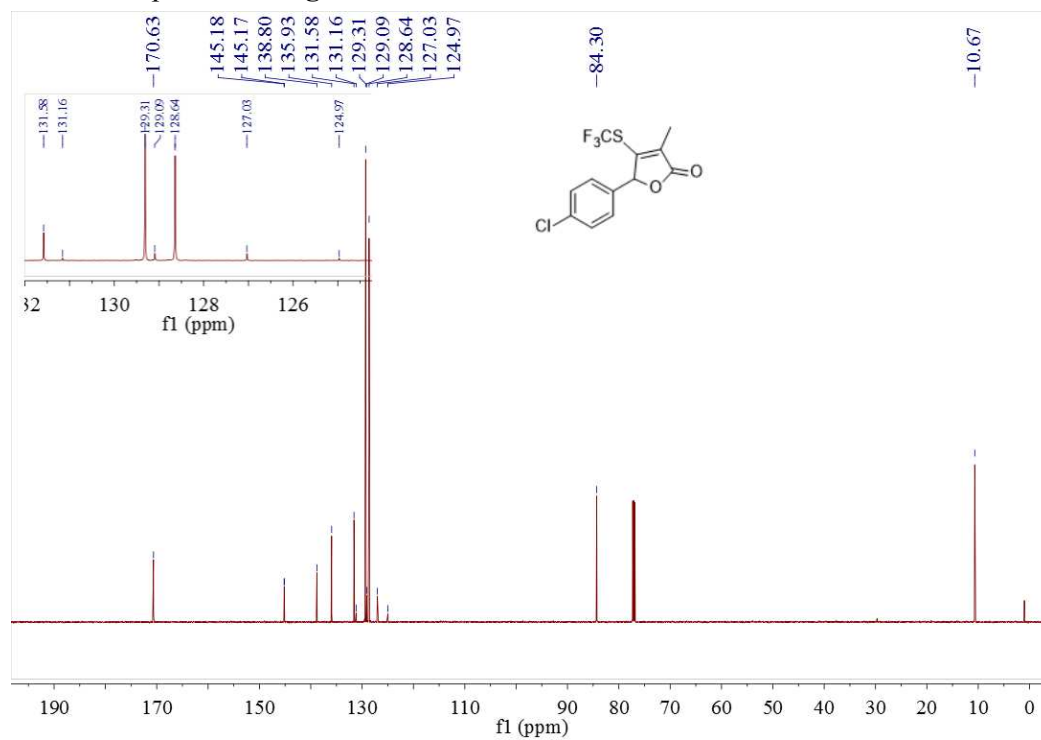

$^1\text{H}$  NMR spectrum of **3h** in  $\text{CDCl}_3$

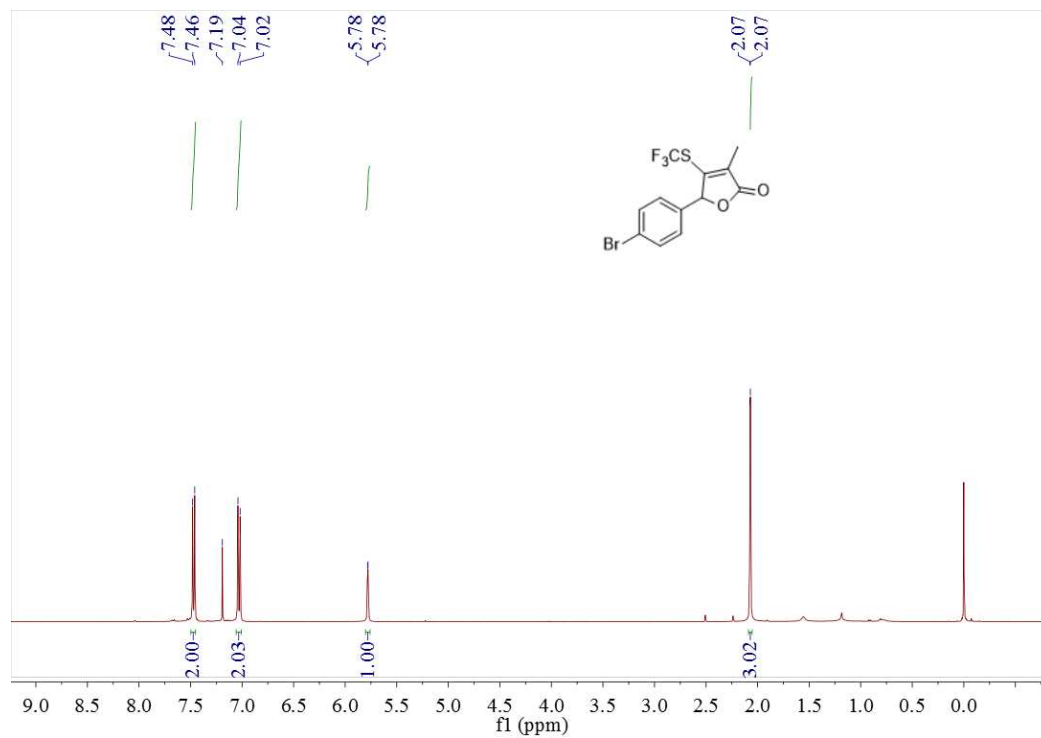

$^{19}\text{F}$  NMR spectrum of **3h** in  $\text{CDCl}_3$

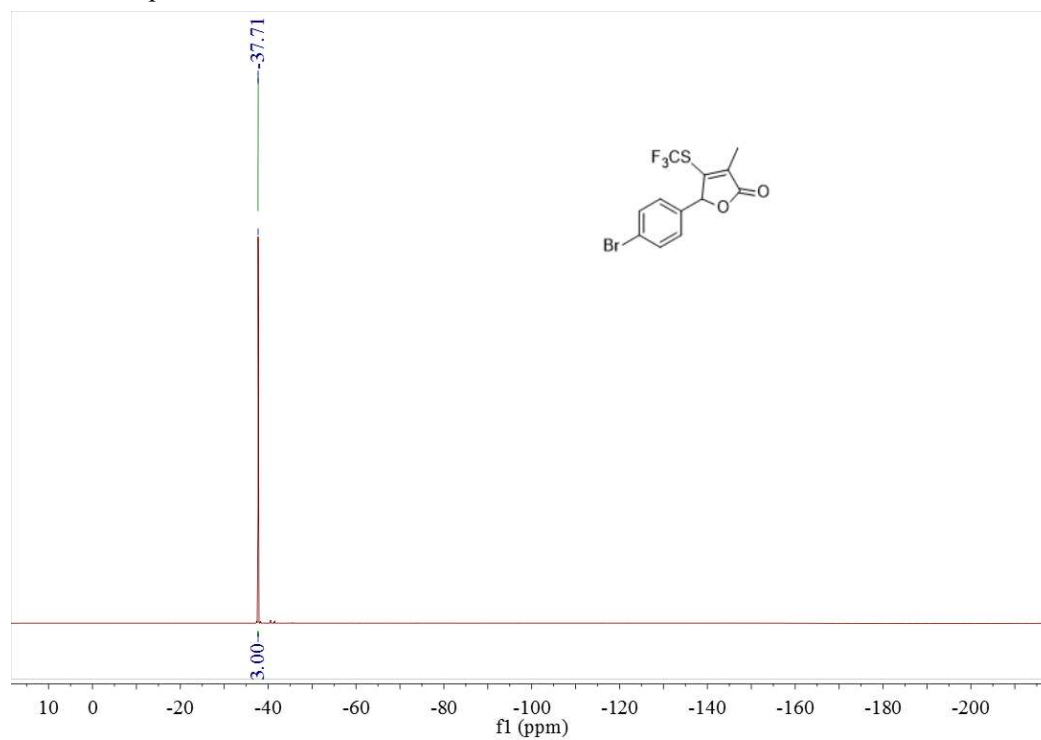



$^{13}\text{C}$  NMR spectrum of **3h** in  $\text{CDCl}_3$

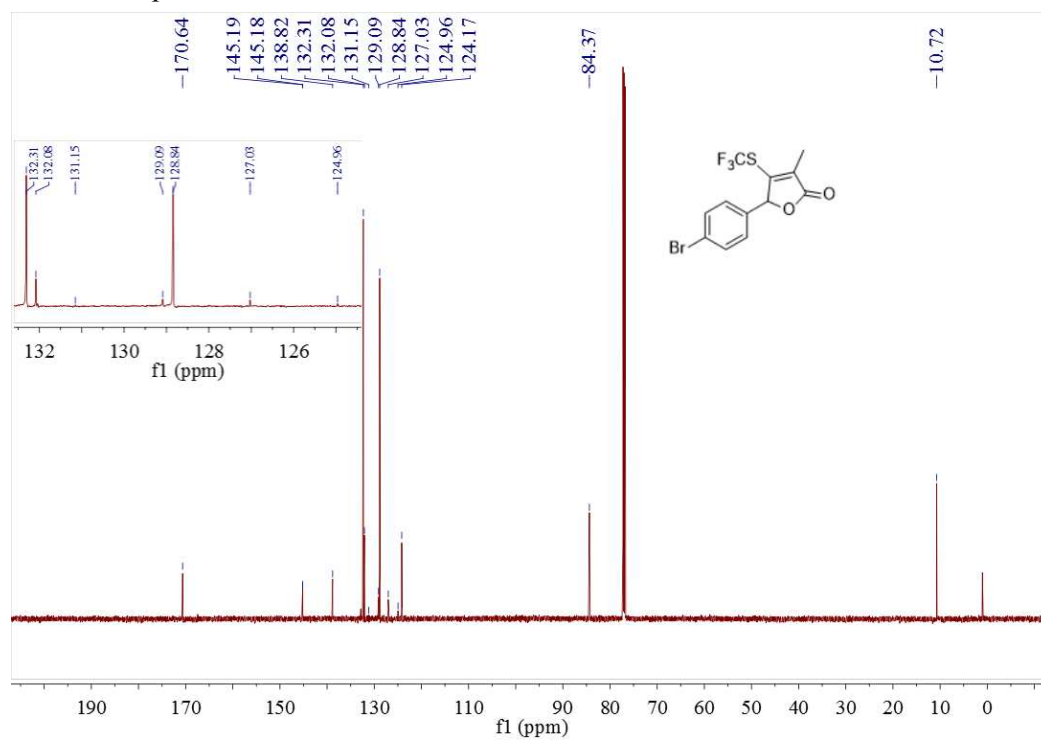

$^1\text{H}$  NMR spectrum of **3i** in  $\text{CDCl}_3$

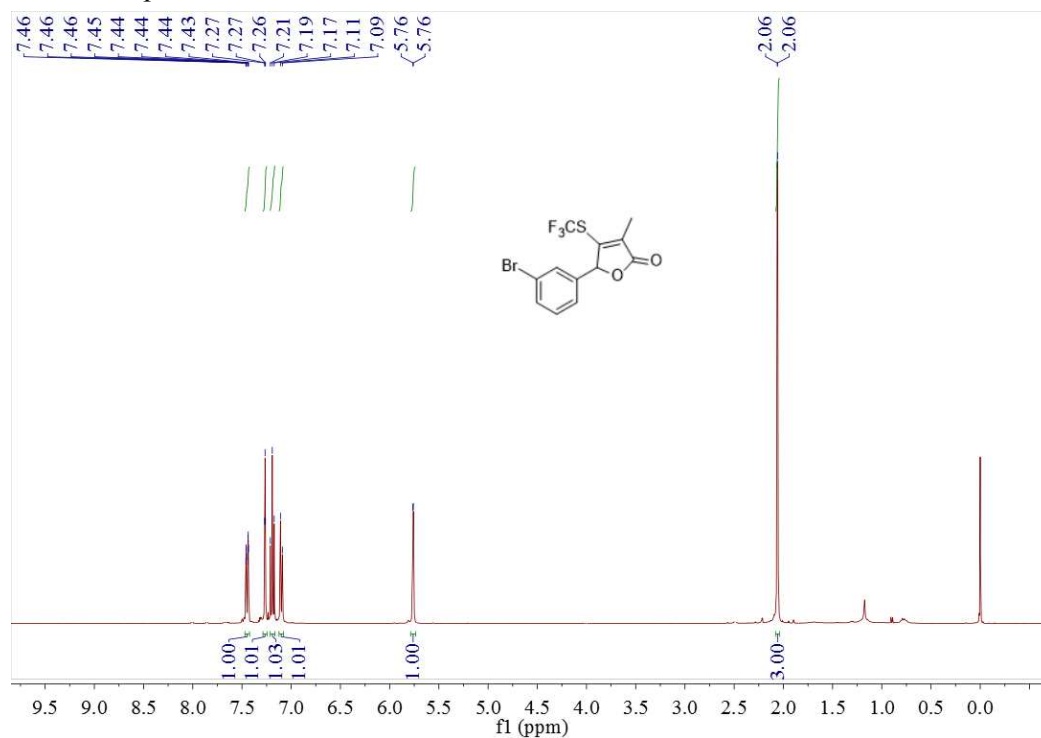

$^{19}\text{F}$  NMR spectrum of **3i** in  $\text{CDCl}_3$

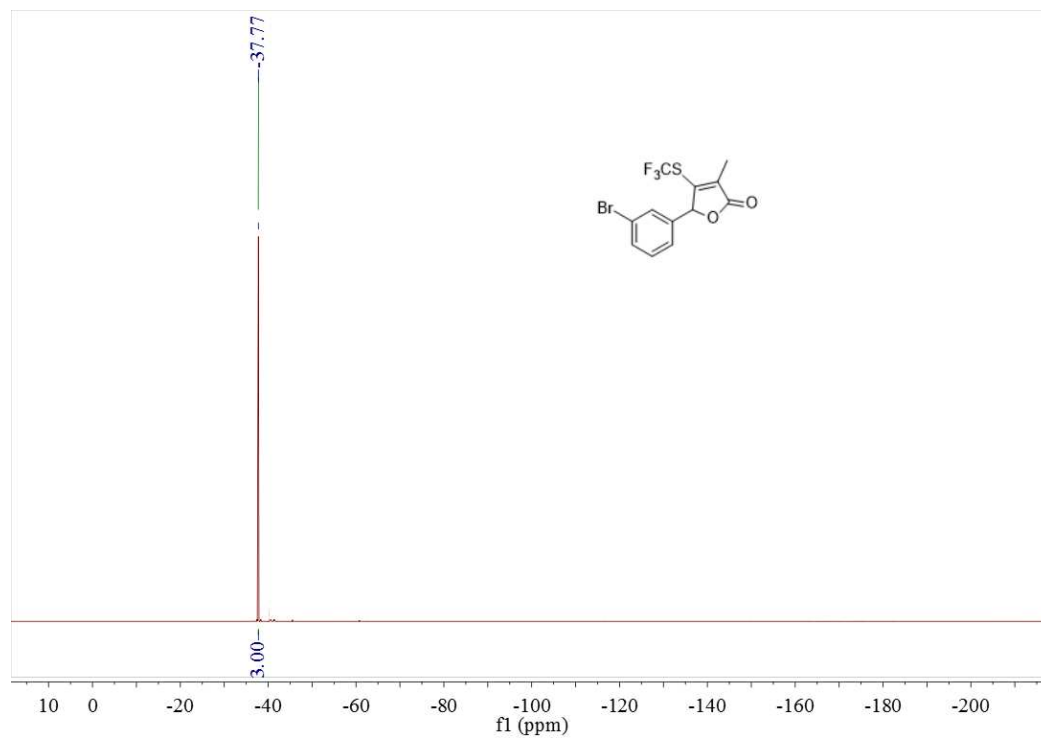

$^{13}\text{C}$  NMR spectrum of **3i** in  $\text{CDCl}_3$

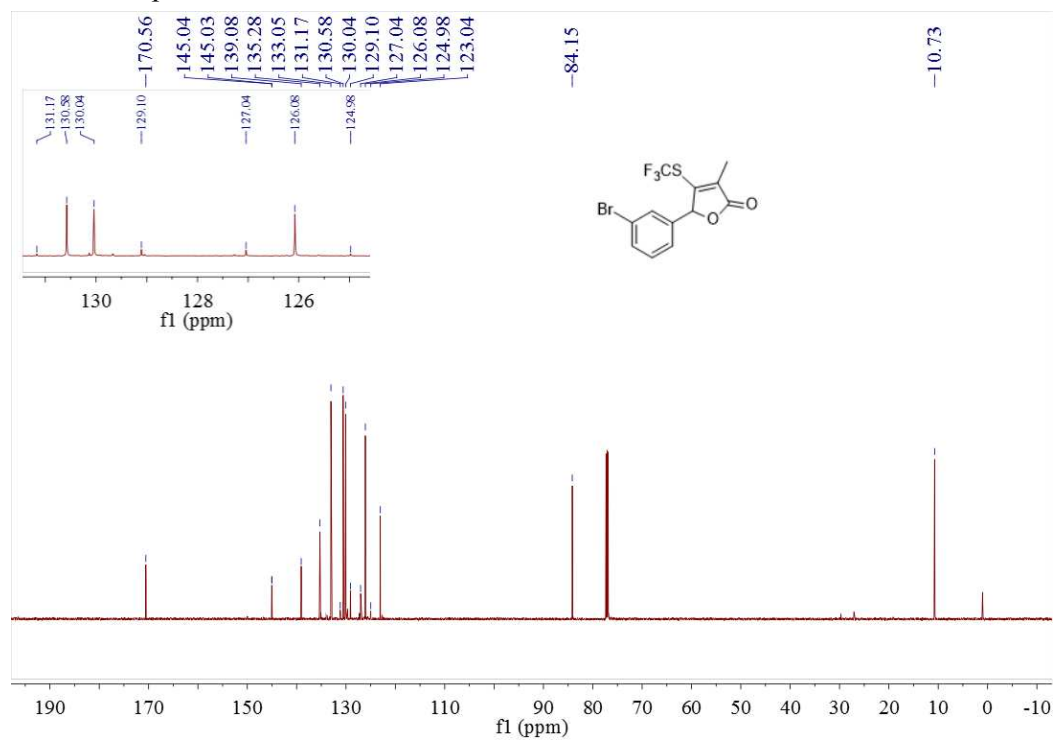

<sup>1</sup>H NMR spectrum of **3j** in CDCl<sub>3</sub>

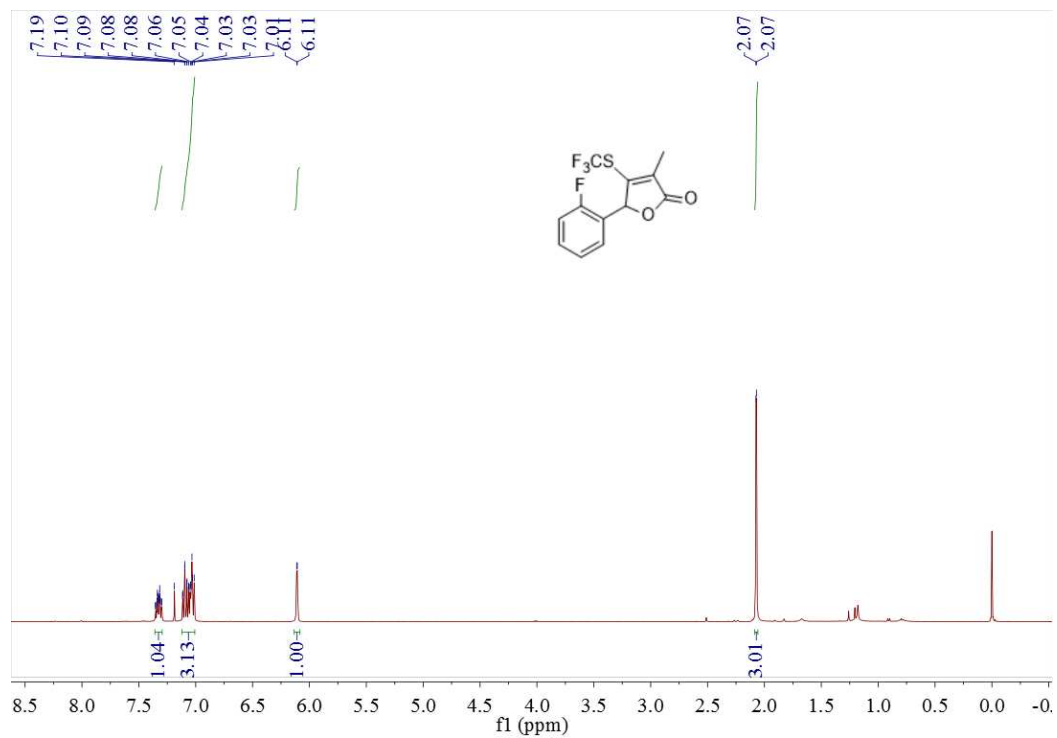

<sup>19</sup>F NMR spectrum of **3j** in CDCl<sub>3</sub>

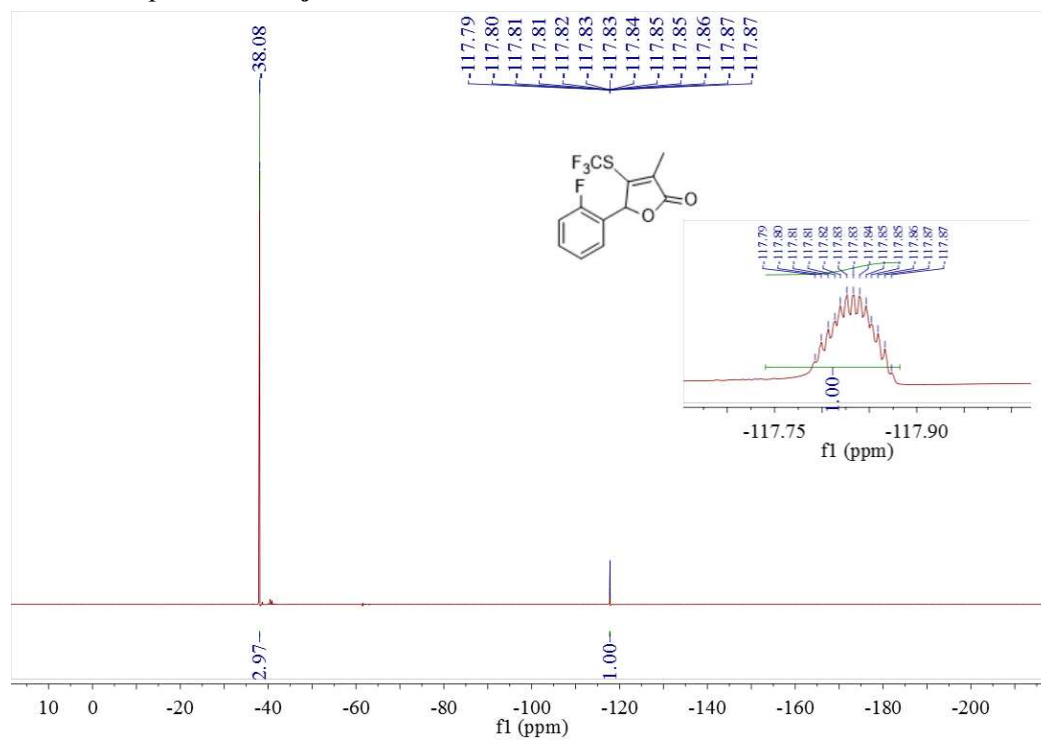

$^{13}\text{C}$  NMR spectrum of **3j** in  $\text{CDCl}_3$

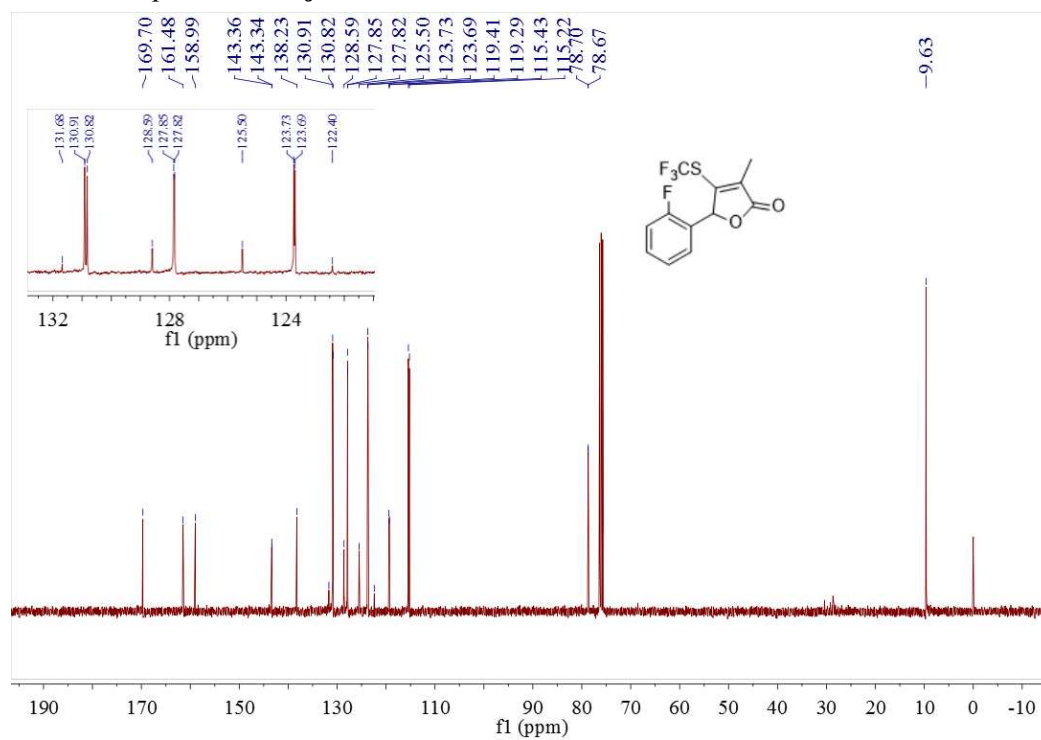

$^1\text{H}$  NMR spectrum of **3k** in  $\text{CDCl}_3$

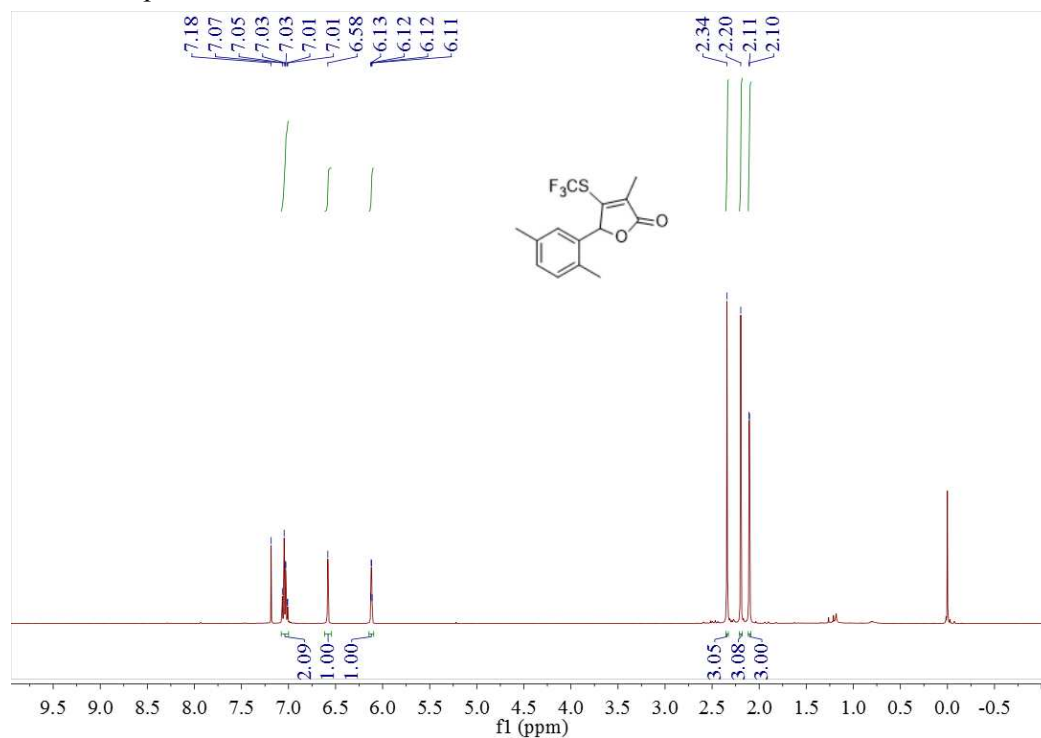

$^{19}\text{F}$  NMR spectrum of **3k** in  $\text{CDCl}_3$

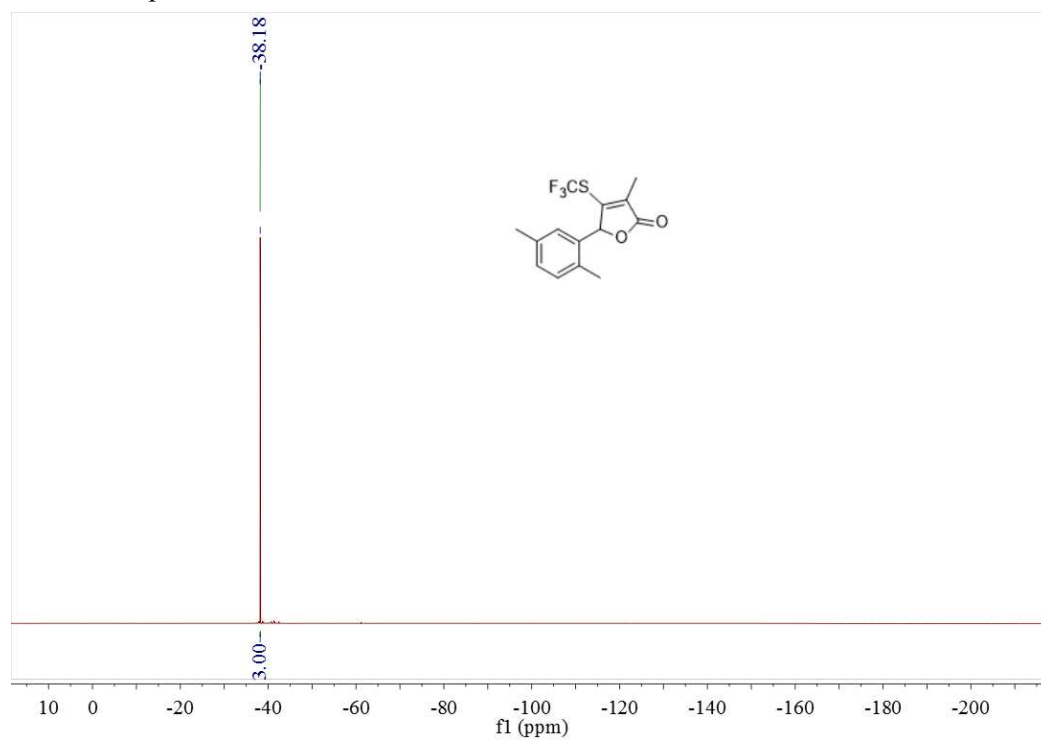

$^{13}\text{C}$  NMR spectrum of **3k** in  $\text{CDCl}_3$

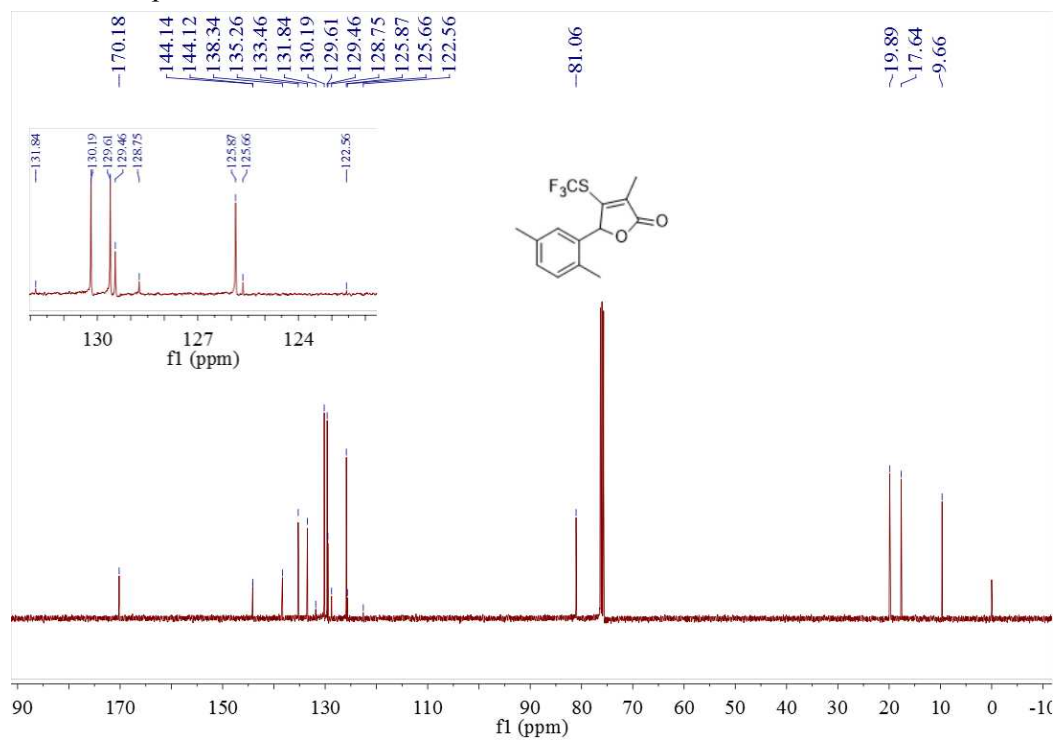

$^1\text{H}$  NMR spectrum of **3I** in  $\text{CDCl}_3$

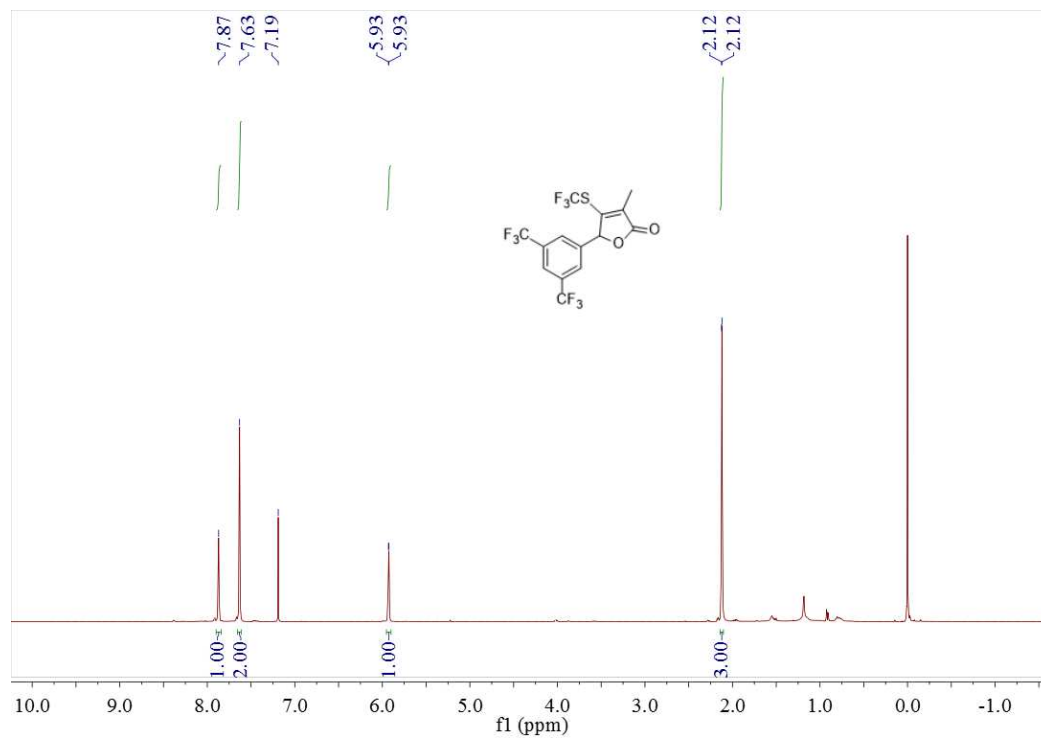

$^{19}\text{F}$  NMR spectrum of **3I** in  $\text{CDCl}_3$

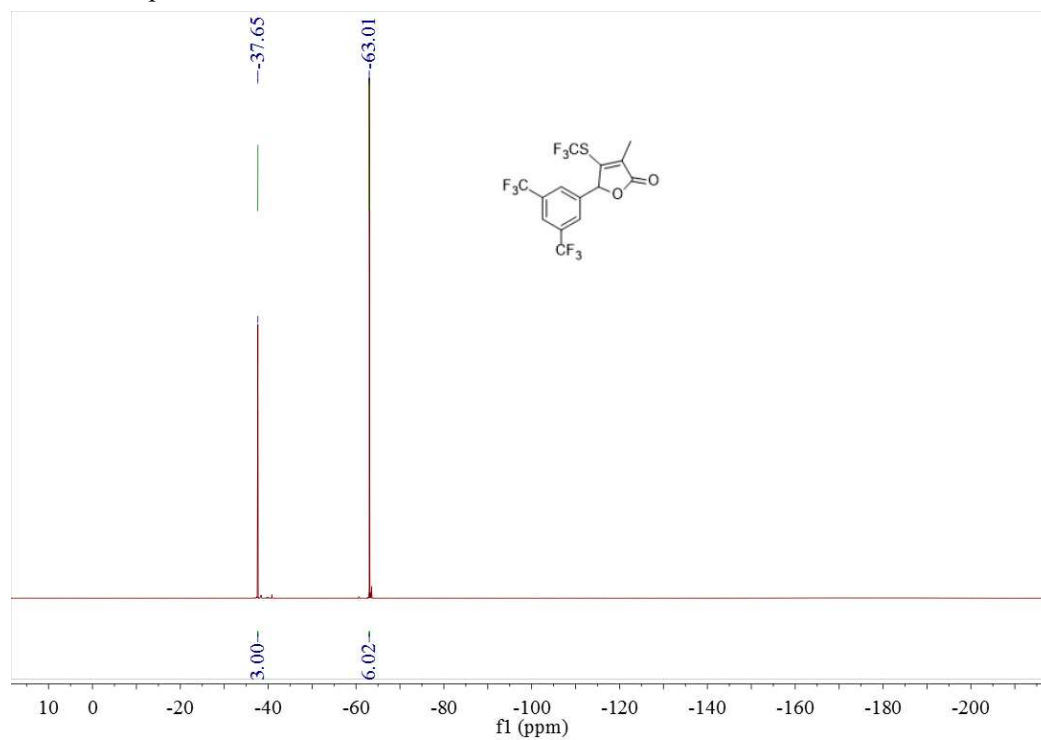

$^{13}\text{C}$  NMR spectrum of **3l** in  $\text{CDCl}_3$

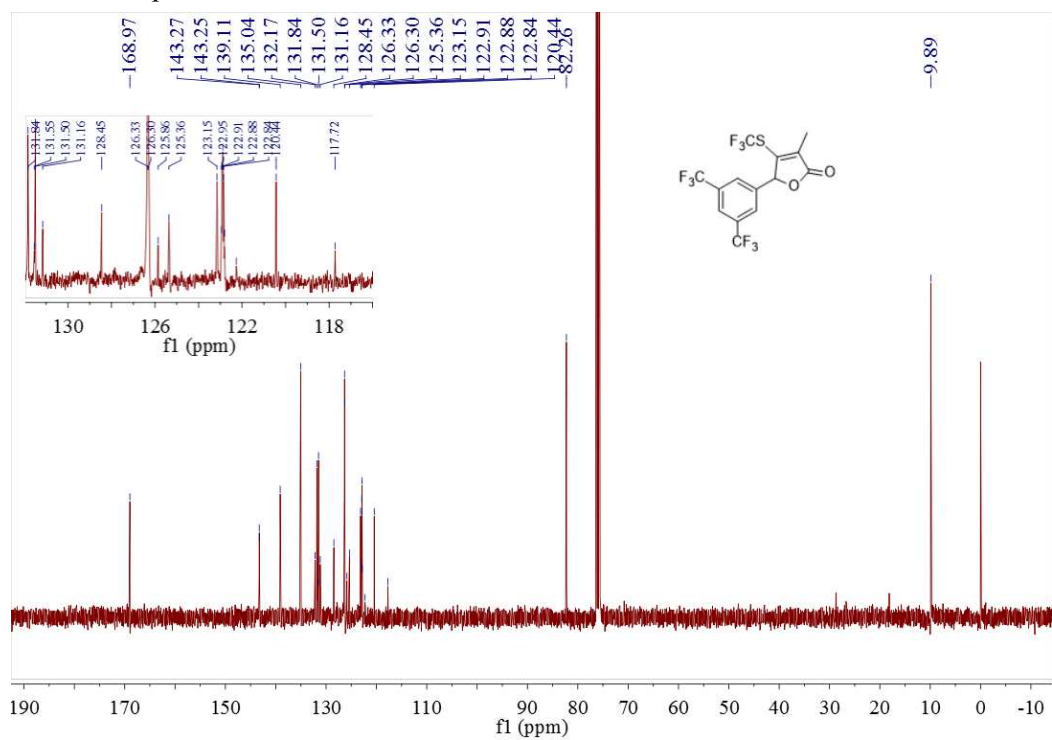

$^1\text{H}$  NMR spectrum of **3m** in  $\text{CDCl}_3$

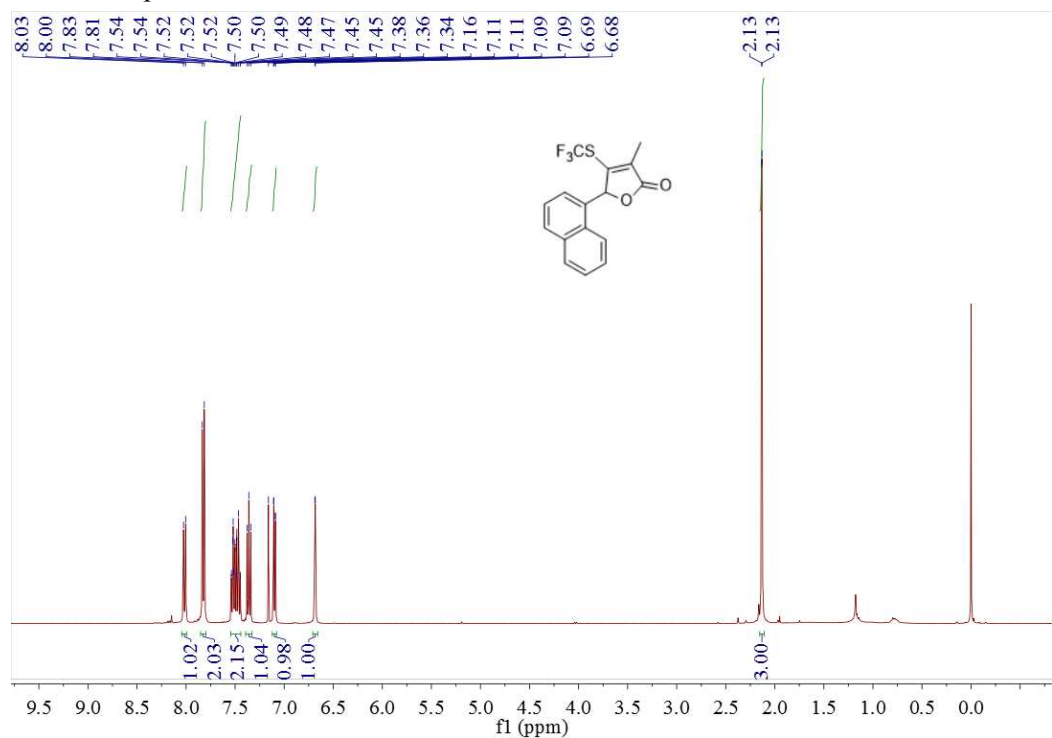

$^{19}\text{F}$  NMR spectrum of **3m** in  $\text{CDCl}_3$

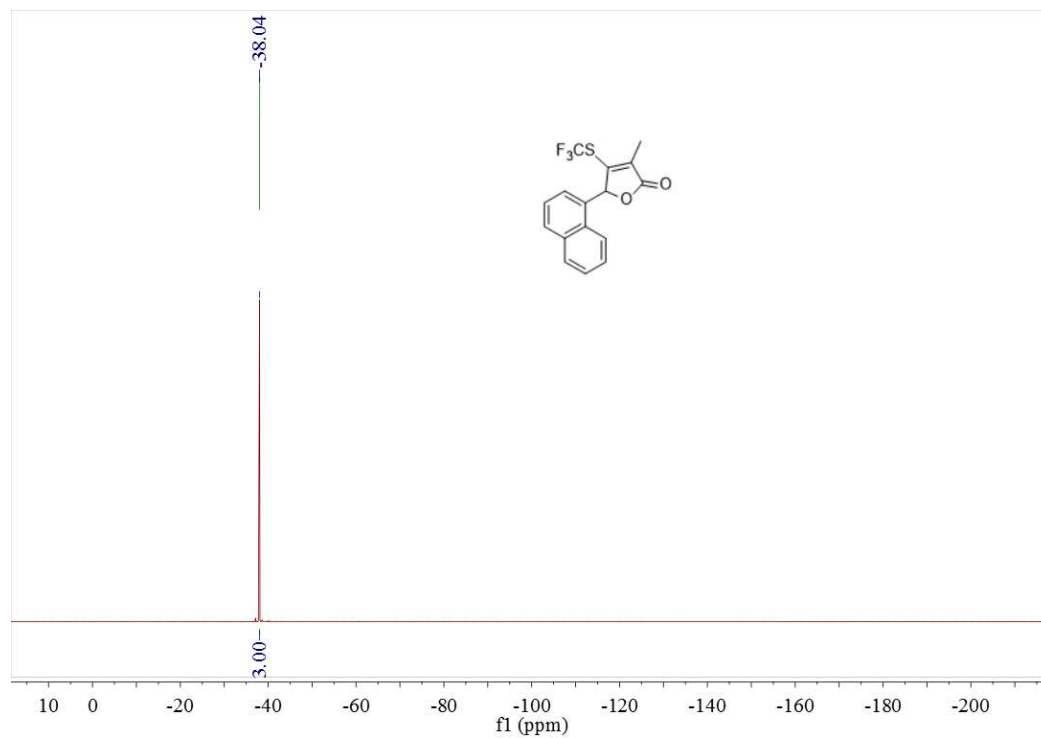

$^{13}\text{C}$  NMR spectrum of **3m** in  $\text{CDCl}_3$

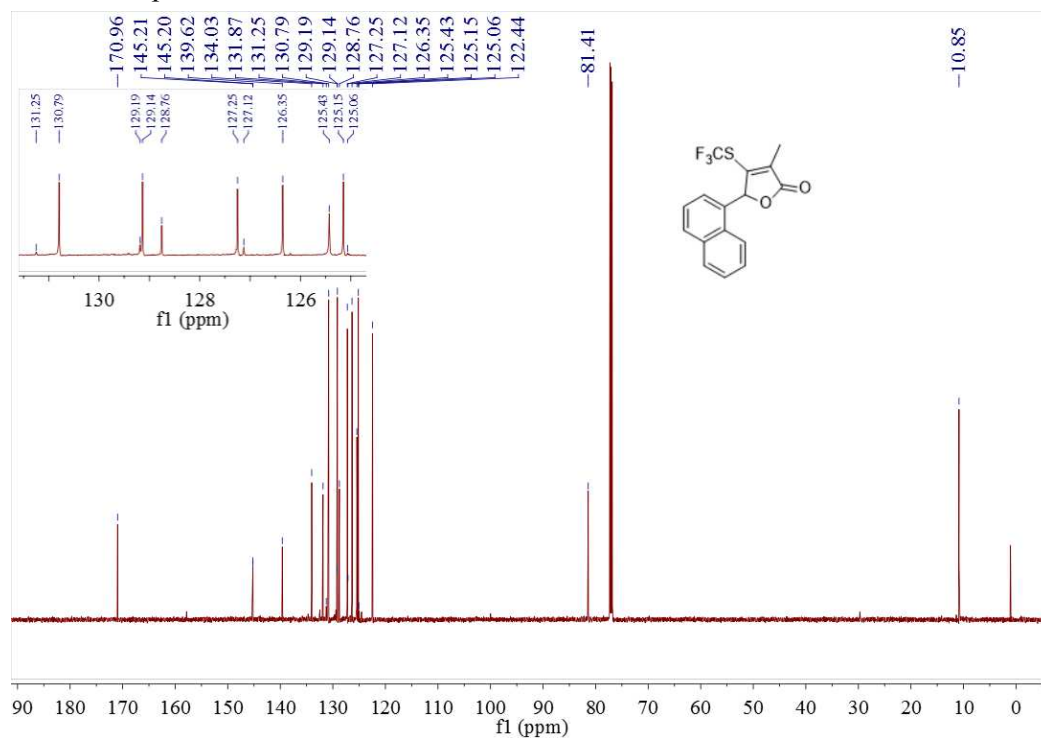



$^1\text{H}$  NMR spectrum of **3n** in  $\text{CDCl}_3$

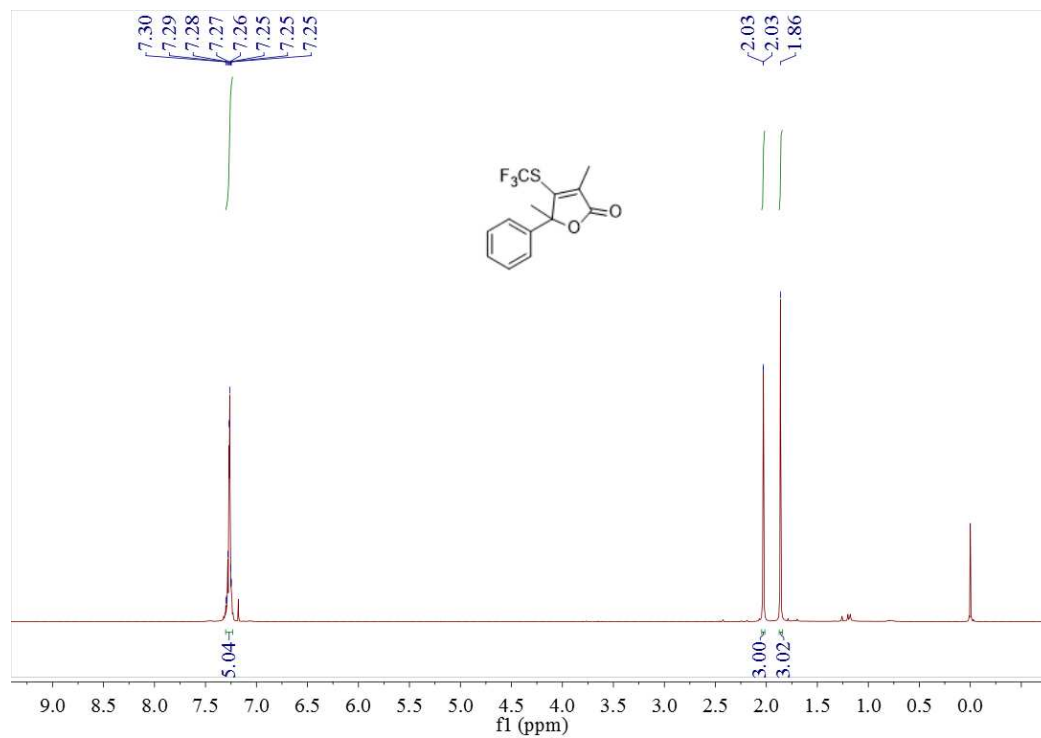

$^{19}\text{F}$  NMR spectrum of **3n** in  $\text{CDCl}_3$

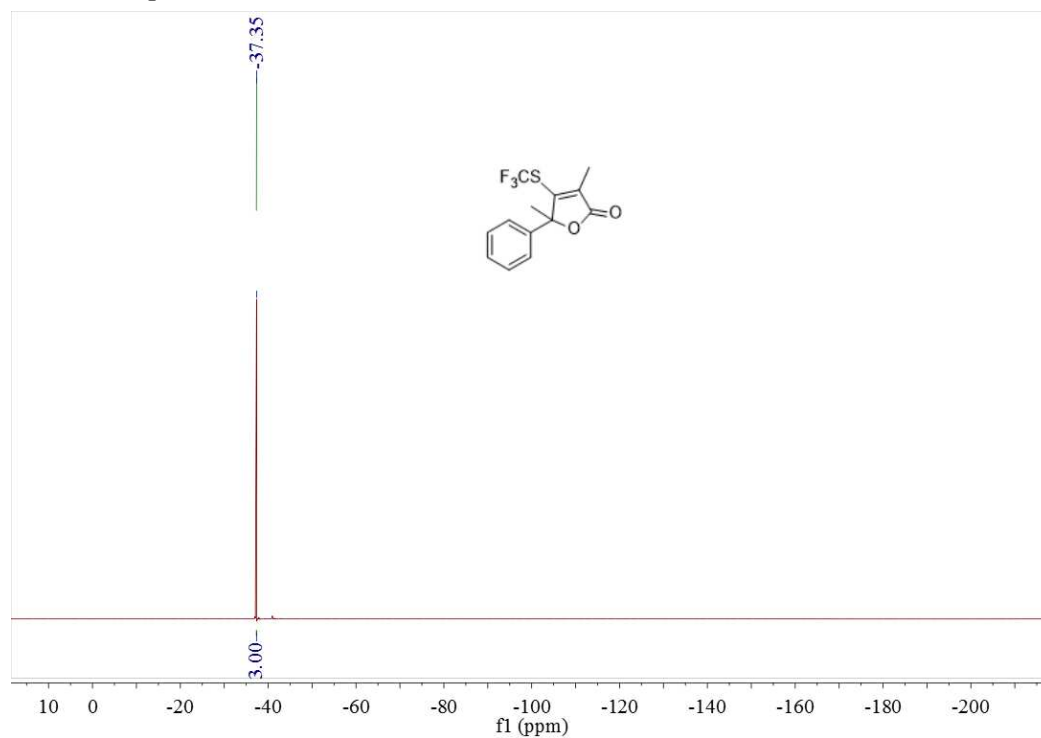

$^{13}\text{C}$  NMR spectrum of **3n** in  $\text{CDCl}_3$

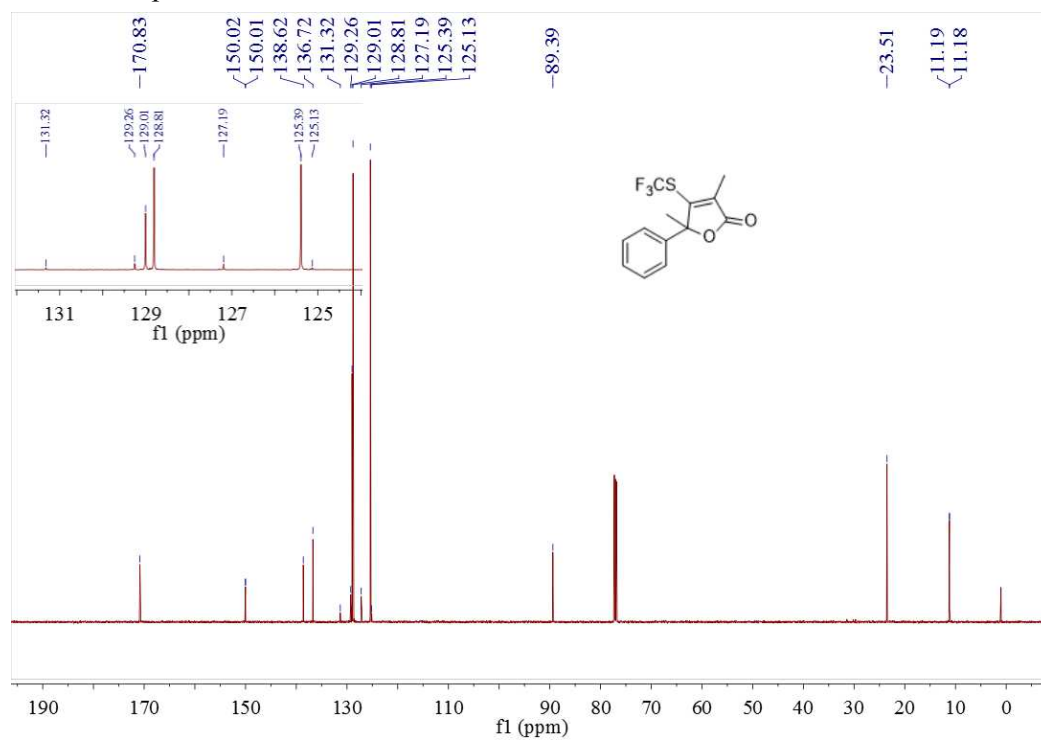

$^1\text{H}$  NMR spectrum of **3o** in  $\text{CDCl}_3$

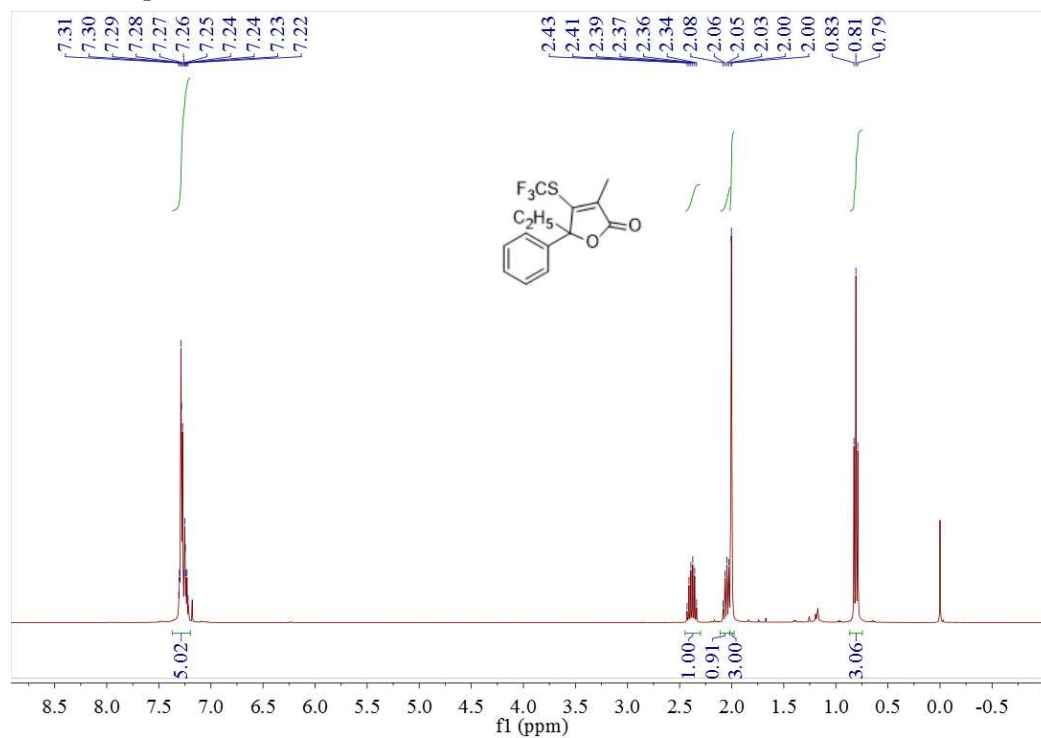

$^{19}\text{F}$  NMR spectrum of **3o** in  $\text{CDCl}_3$

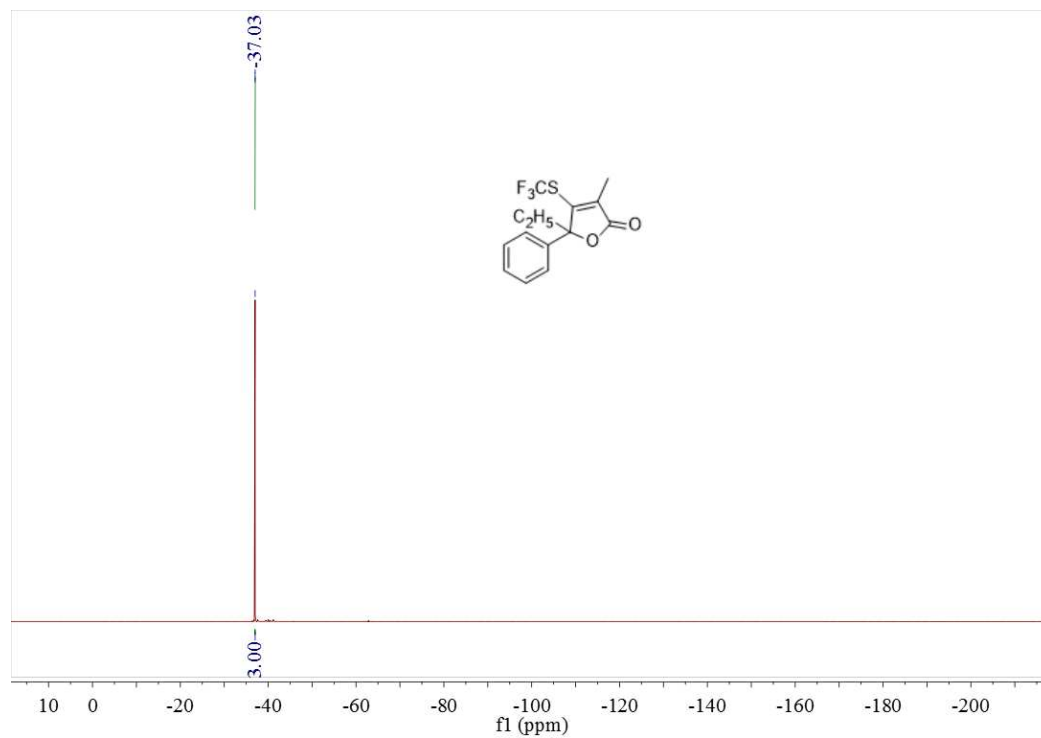

$^{13}\text{C}$  NMR spectrum of **3o** in  $\text{CDCl}_3$

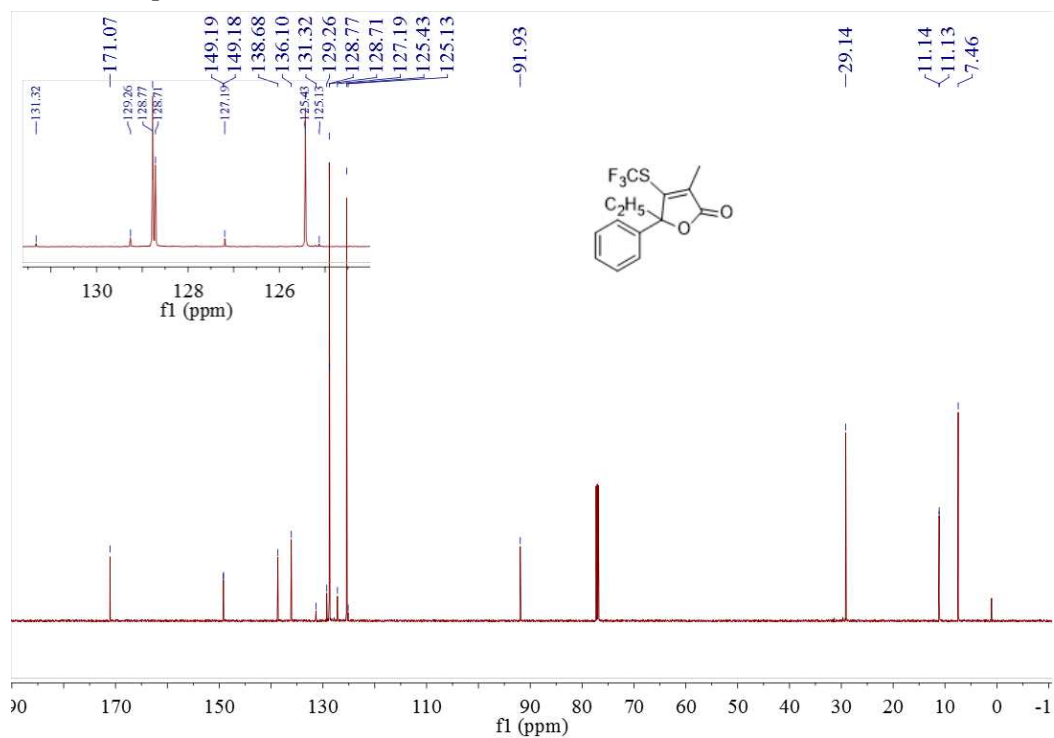

$^1\text{H}$  NMR spectrum of **3p** in  $\text{CDCl}_3$

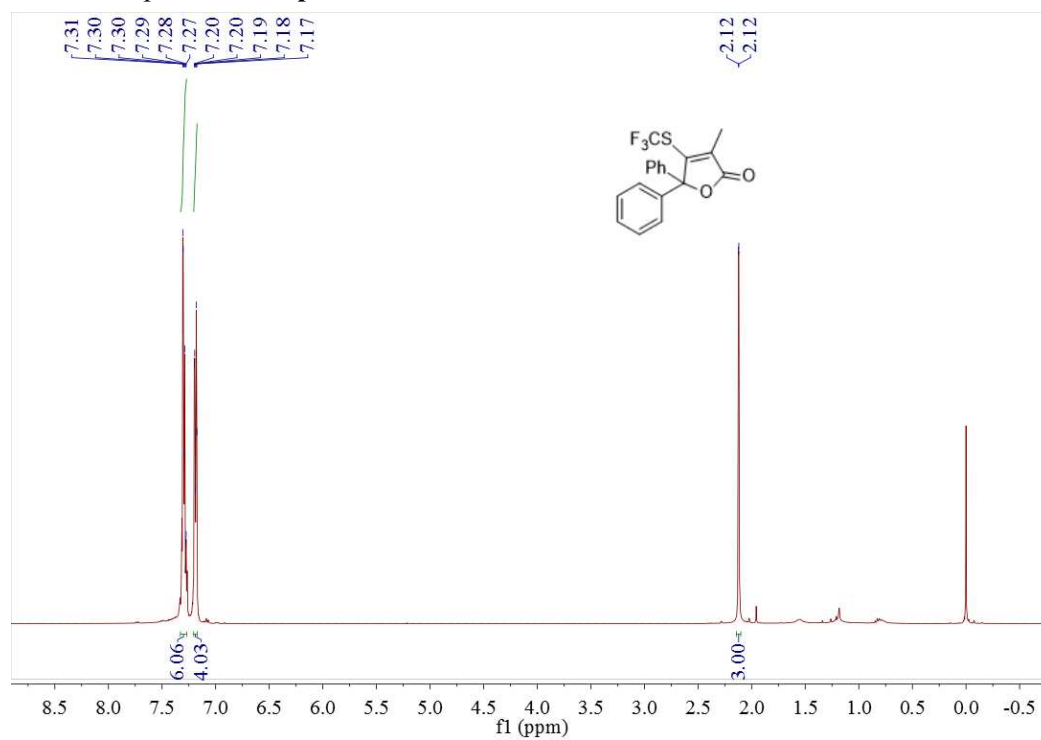

$^{19}\text{F}$  NMR spectrum of **3p** in  $\text{CDCl}_3$

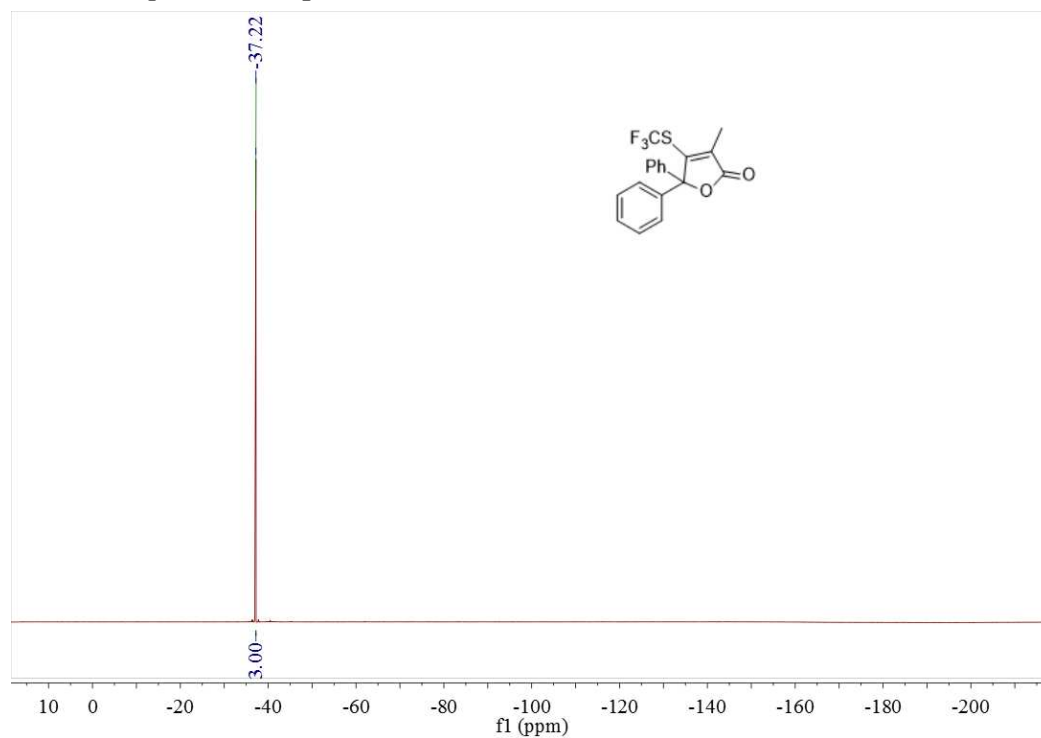

$^{13}\text{C}$  NMR spectrum of **3p** in  $\text{CDCl}_3$

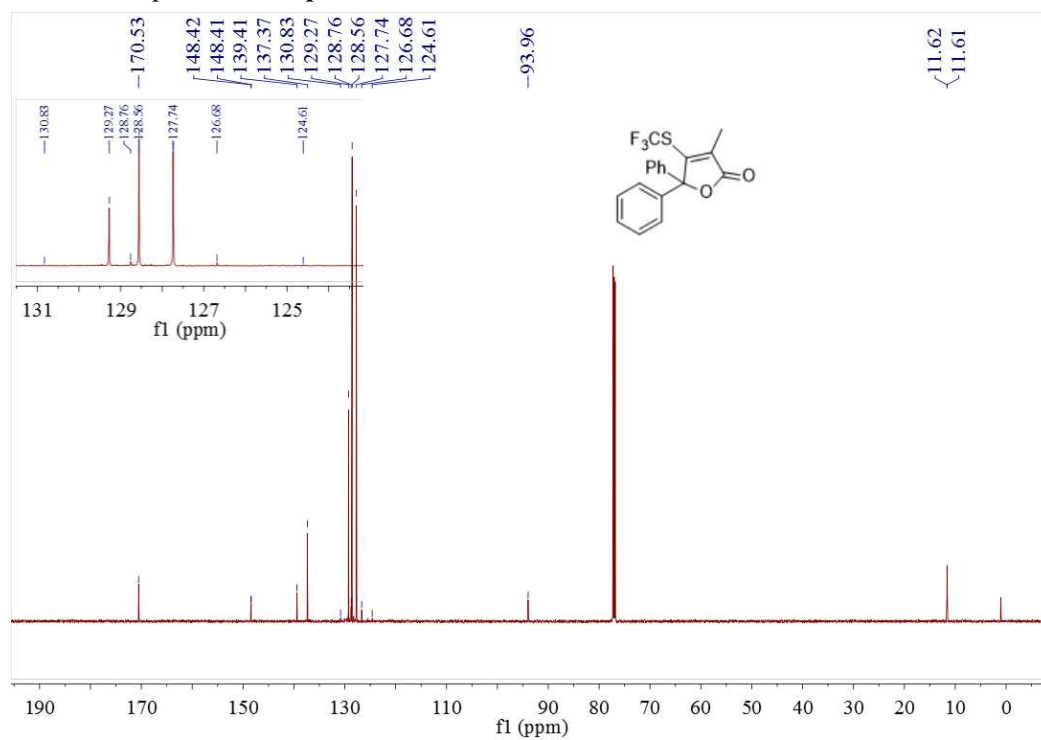

$^1\text{H}$  NMR spectrum of **3q** in  $\text{CDCl}_3$

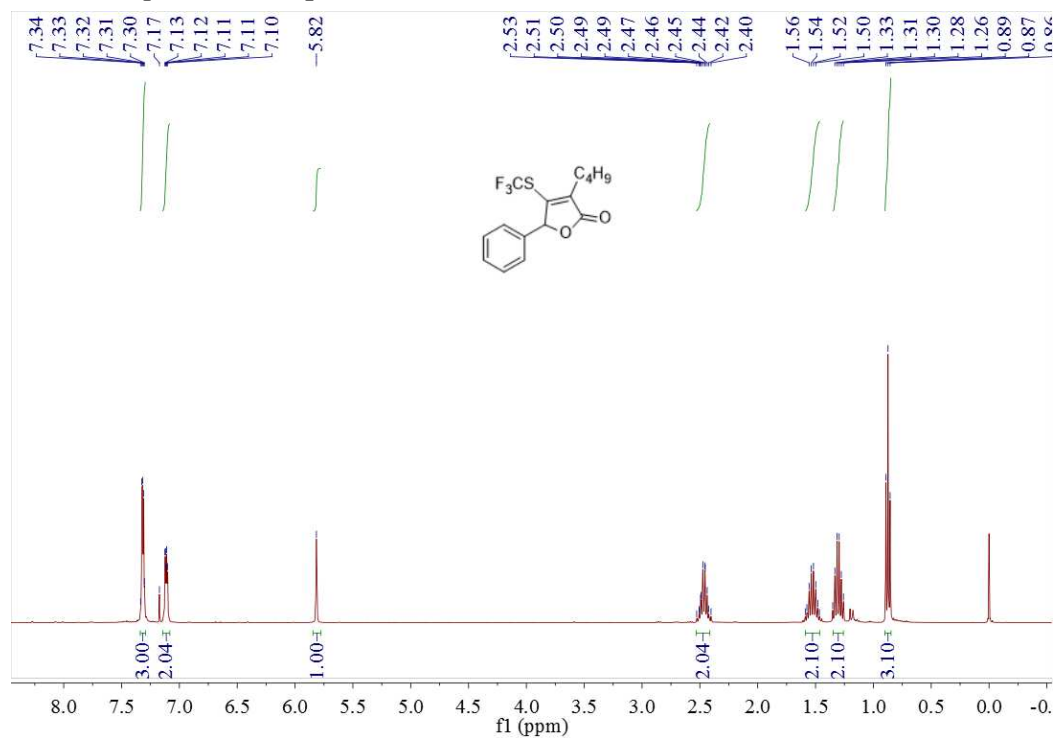

$^{19}\text{F}$  NMR spectrum of **3q** in  $\text{CDCl}_3$

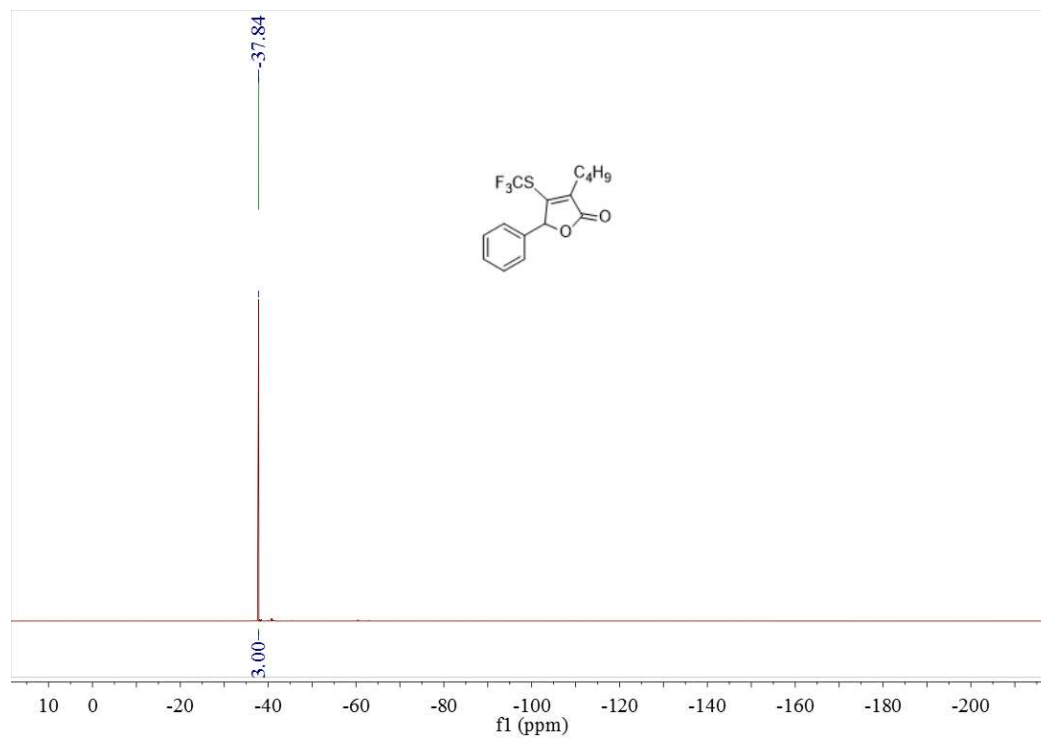

$^{13}\text{C}$  NMR spectrum of **3q** in  $\text{CDCl}_3$

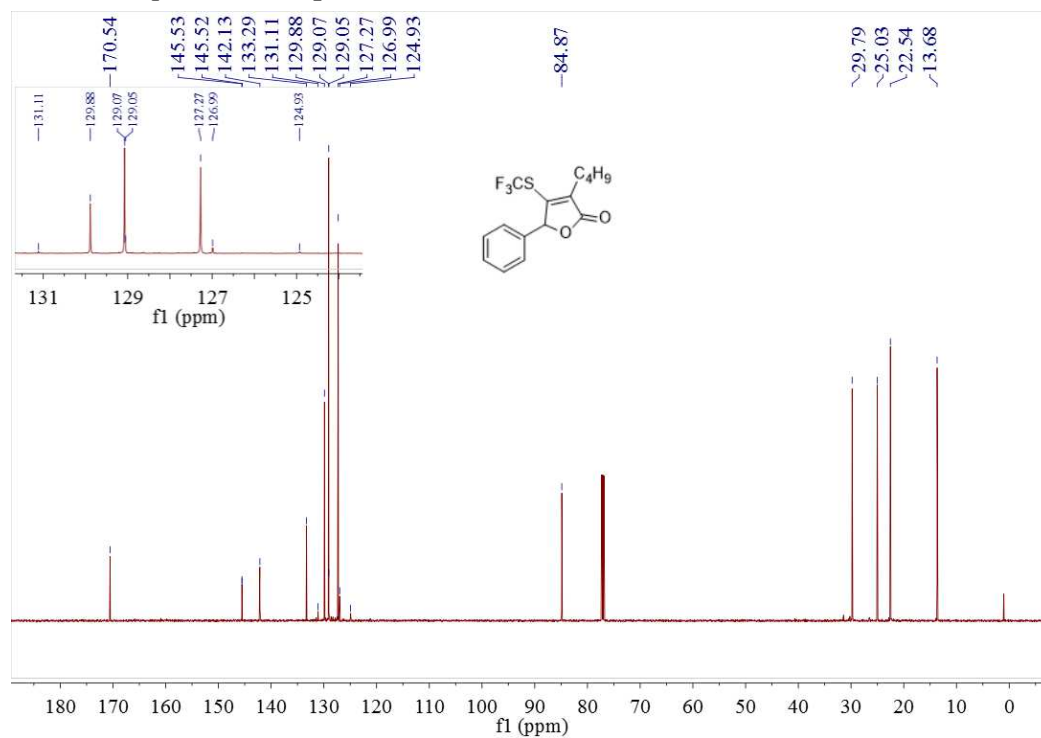

$^1\text{H}$  NMR spectrum of **4r** in  $\text{CDCl}_3$

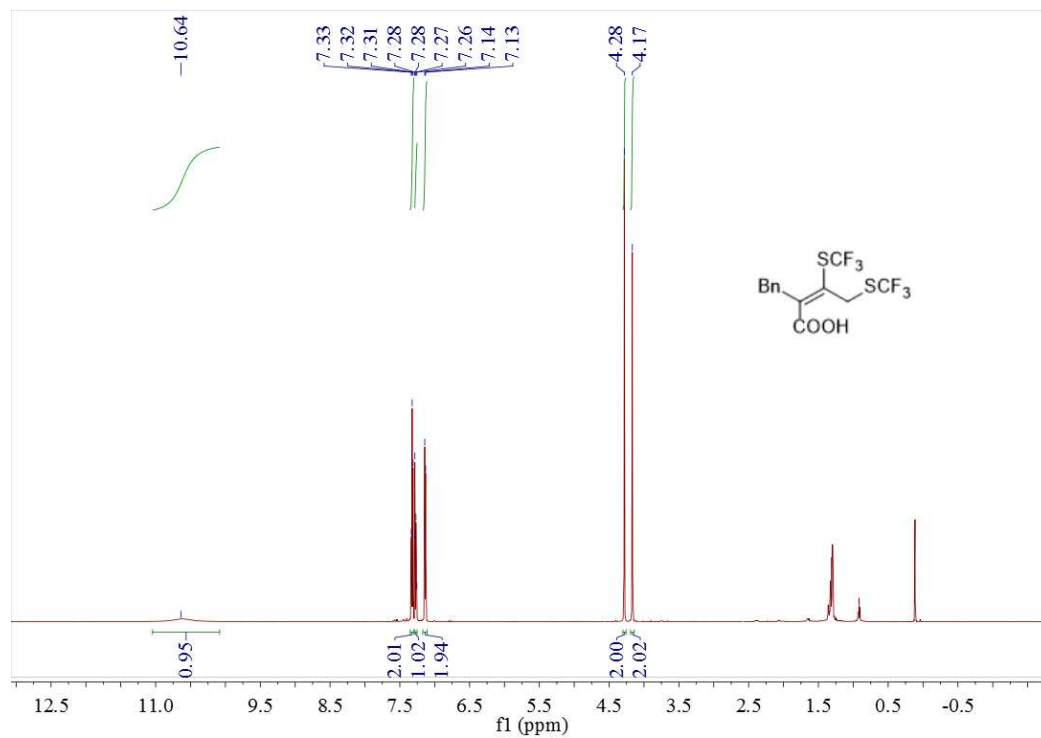

$^{19}\text{F}$  NMR spectrum of **4r** in  $\text{CDCl}_3$

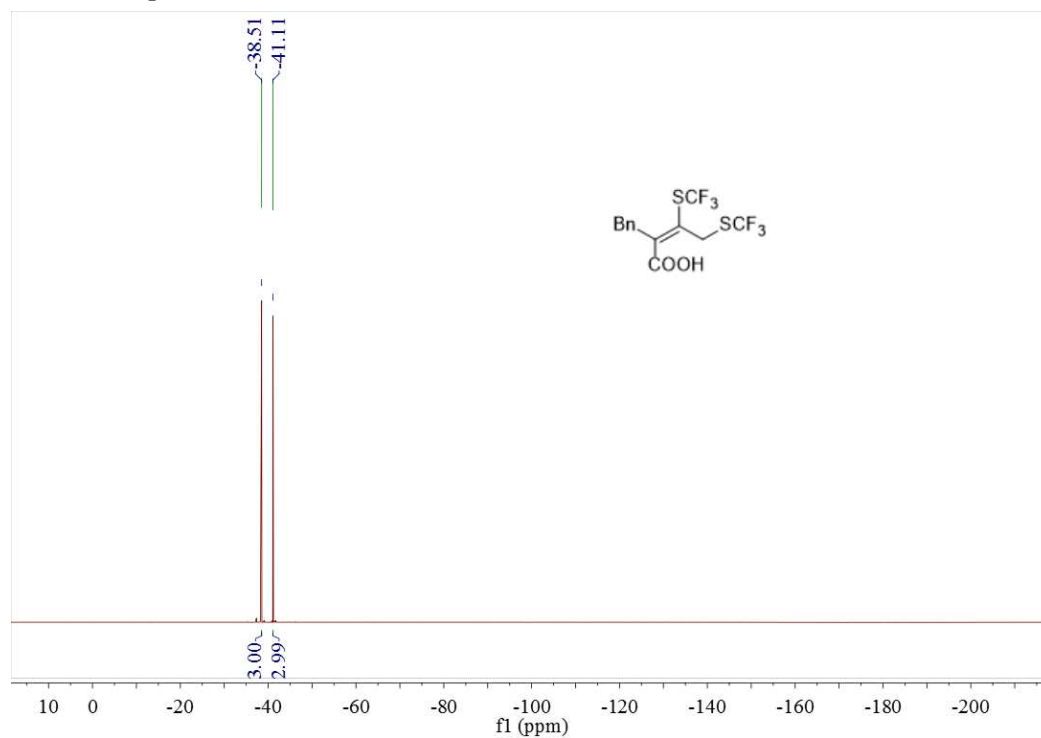

$^{13}\text{C}$  NMR spectrum of **4r** in  $\text{CDCl}_3$

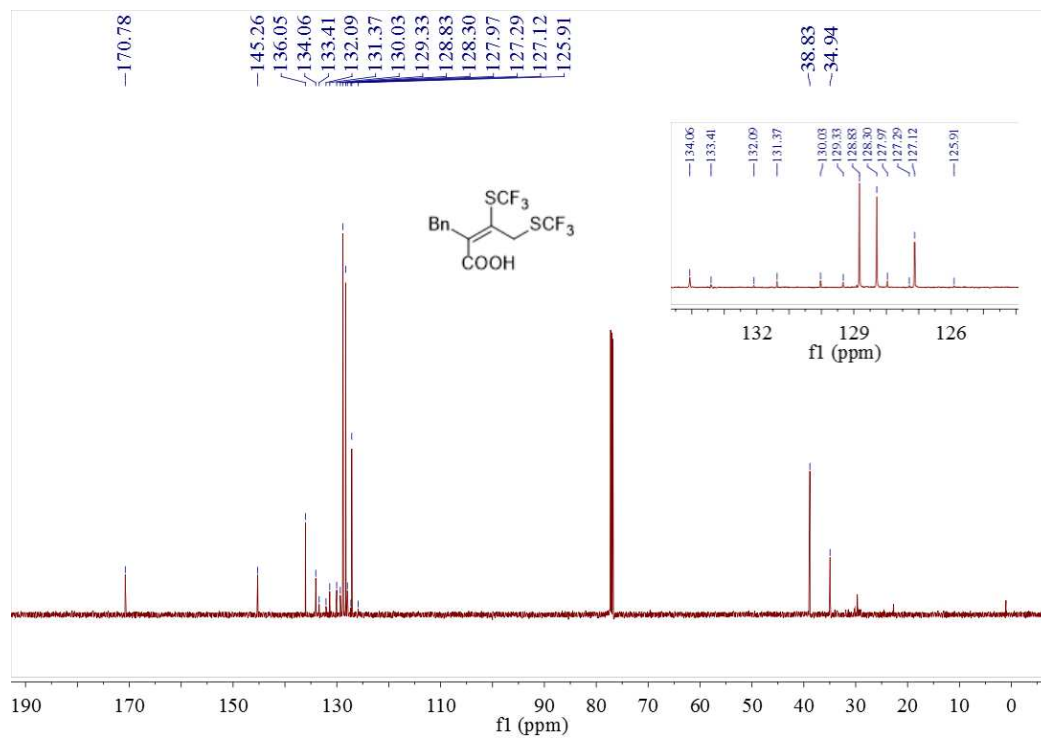

$^1\text{H}$  NMR spectrum of **4s** in  $\text{CDCl}_3$

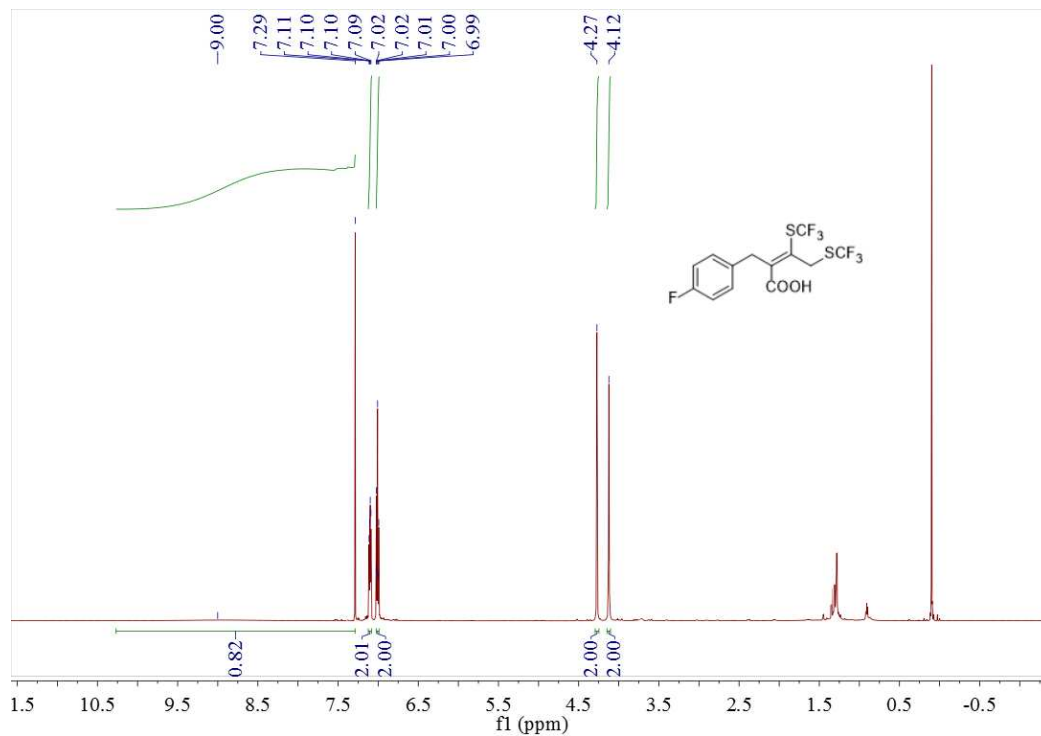



$^{19}\text{F}$  NMR spectrum of **4s** in  $\text{CDCl}_3$

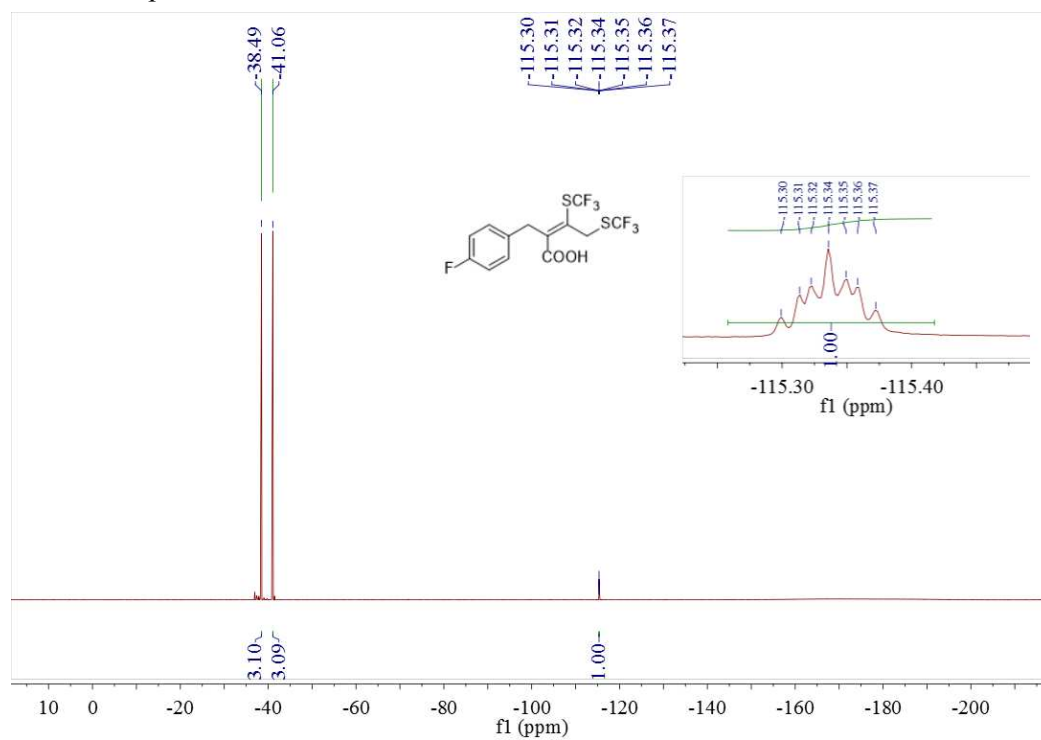

$^{13}\text{C}$  NMR spectrum of **4s** in  $\text{CDCl}_3$

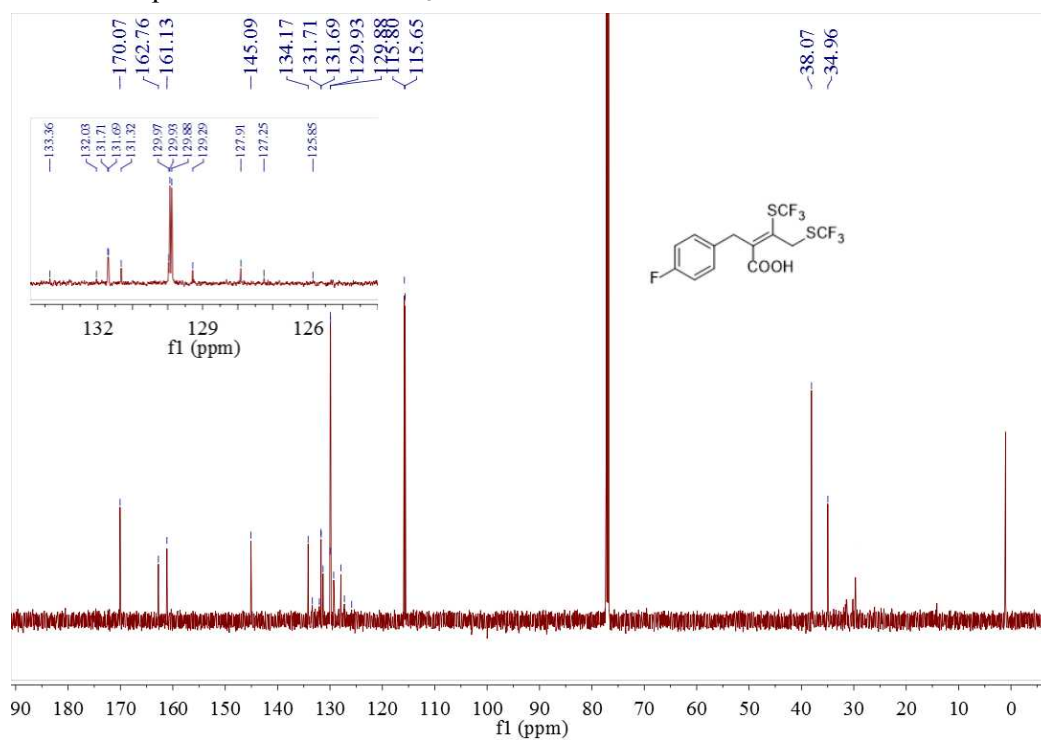

$^1\text{H}$  NMR spectrum of **4t** in  $\text{CDCl}_3$

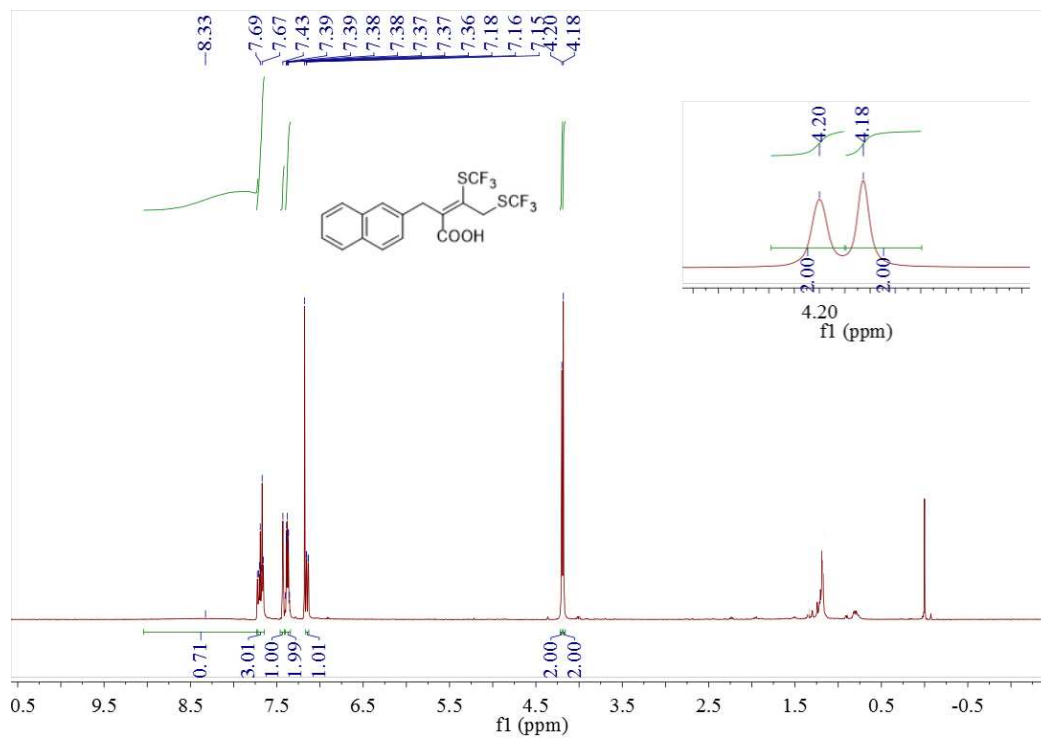

$^{19}\text{F}$  NMR spectrum of **4t** in  $\text{CDCl}_3$

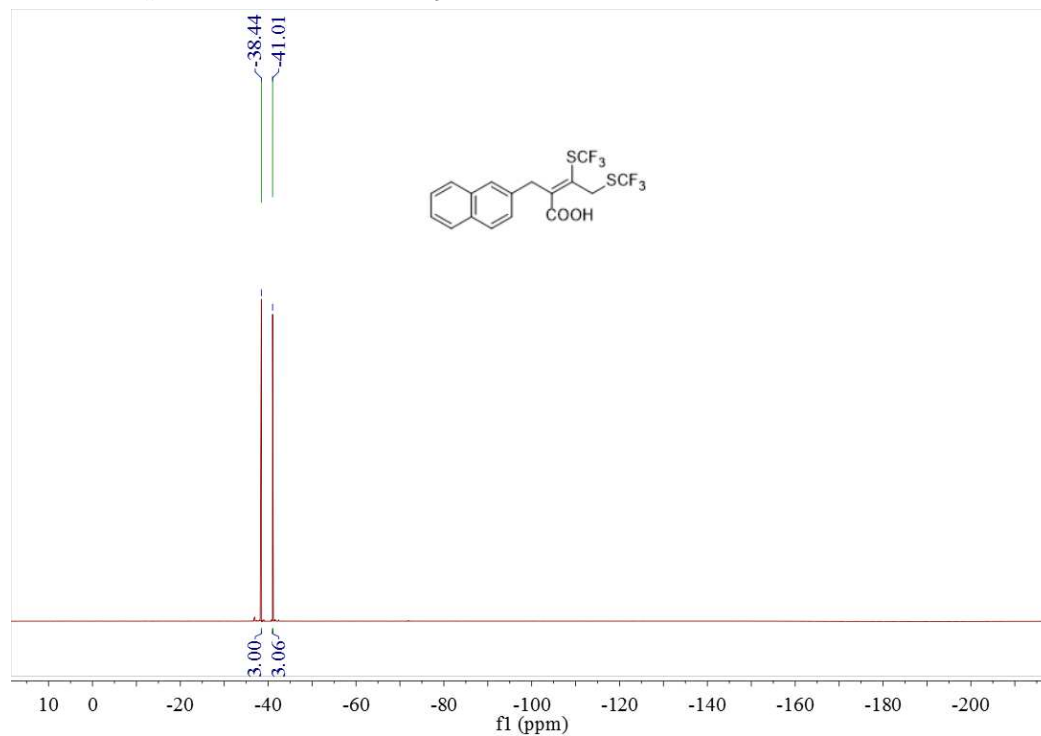

$^{13}\text{C}$  NMR spectrum of **4t** in  $\text{CDCl}_3$

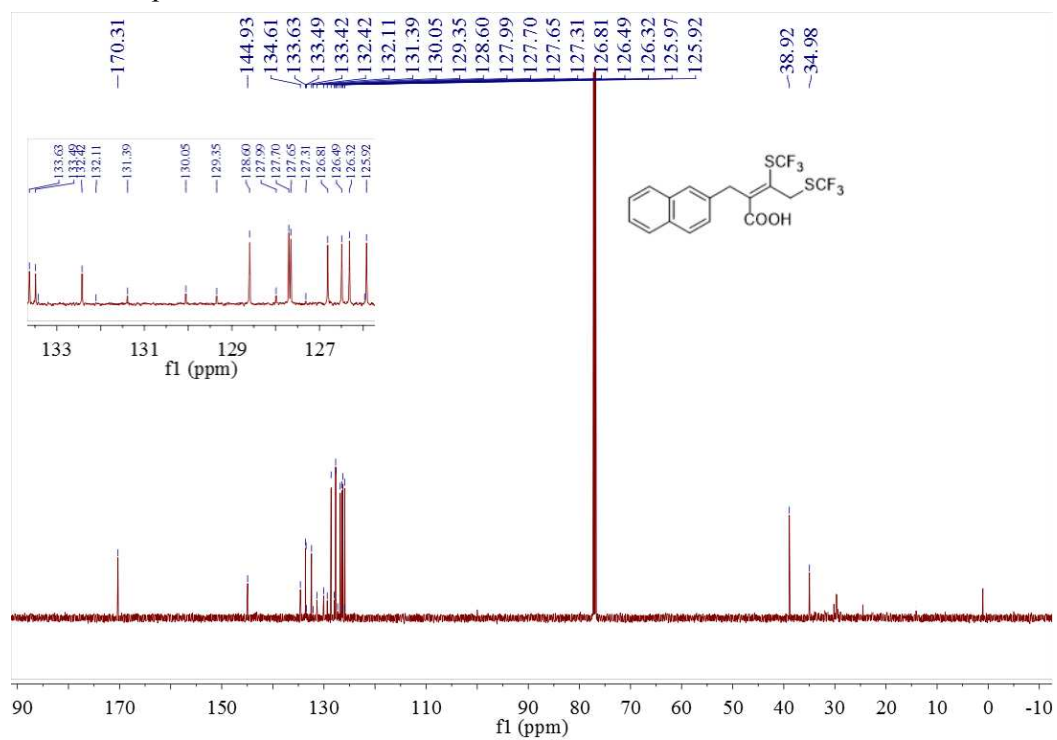

$^1\text{H}$  NMR spectrum of **4u** in  $\text{CDCl}_3$

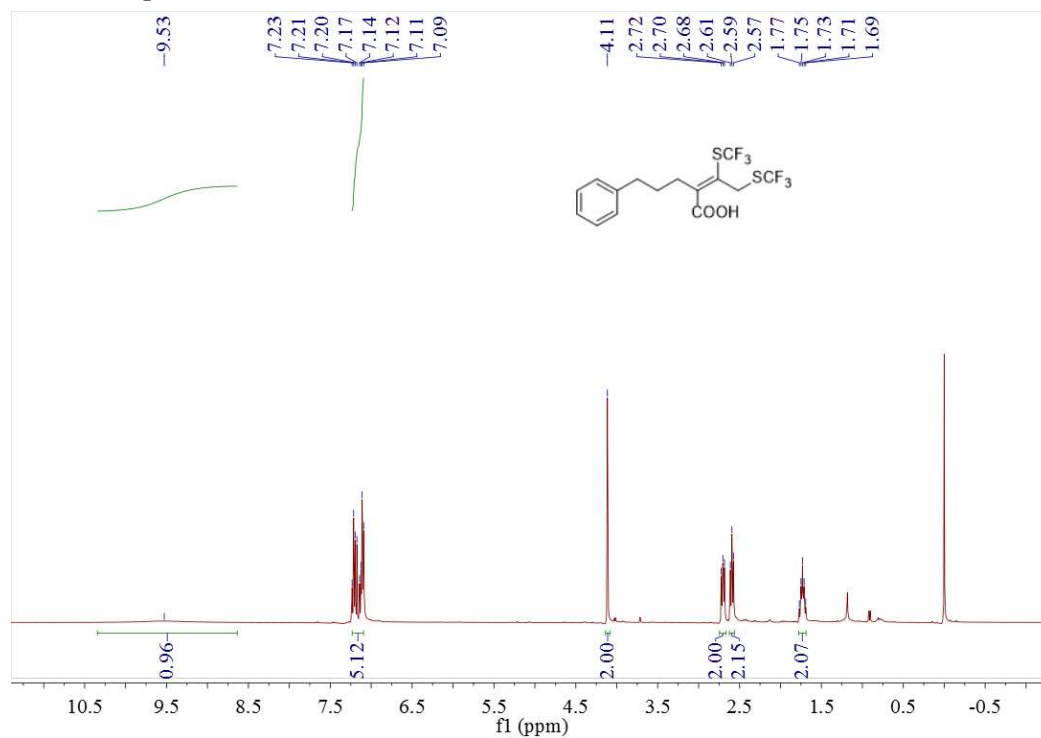

$^{19}\text{F}$  NMR spectrum of **4u** in  $\text{CDCl}_3$

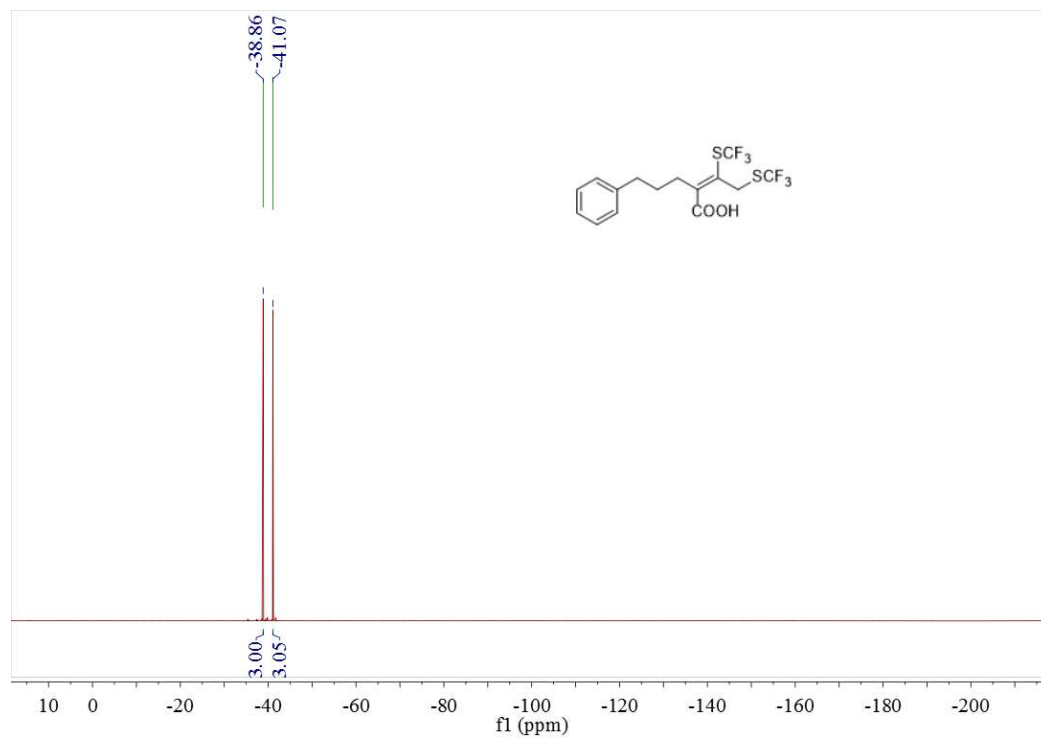

$^{13}\text{C}$  NMR spectrum of **4u** in  $\text{CDCl}_3$

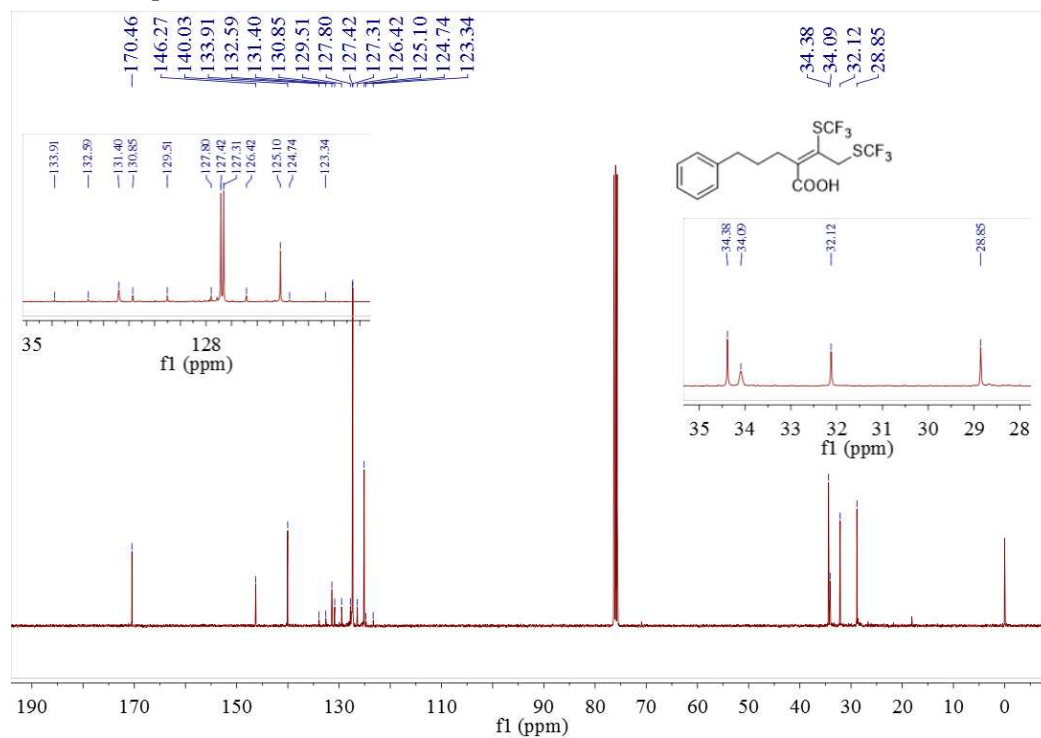

$^1\text{H}$  NMR spectrum of **4v** in  $\text{CDCl}_3$

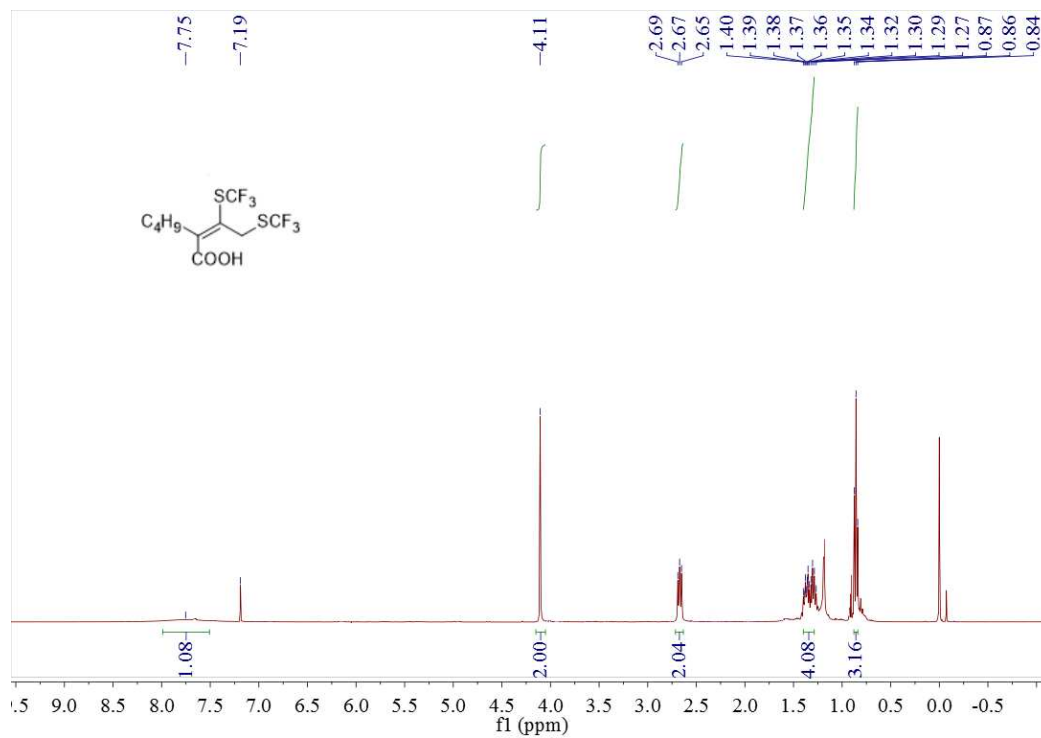

$^{19}\text{F}$  NMR spectrum of **4v** in  $\text{CDCl}_3$

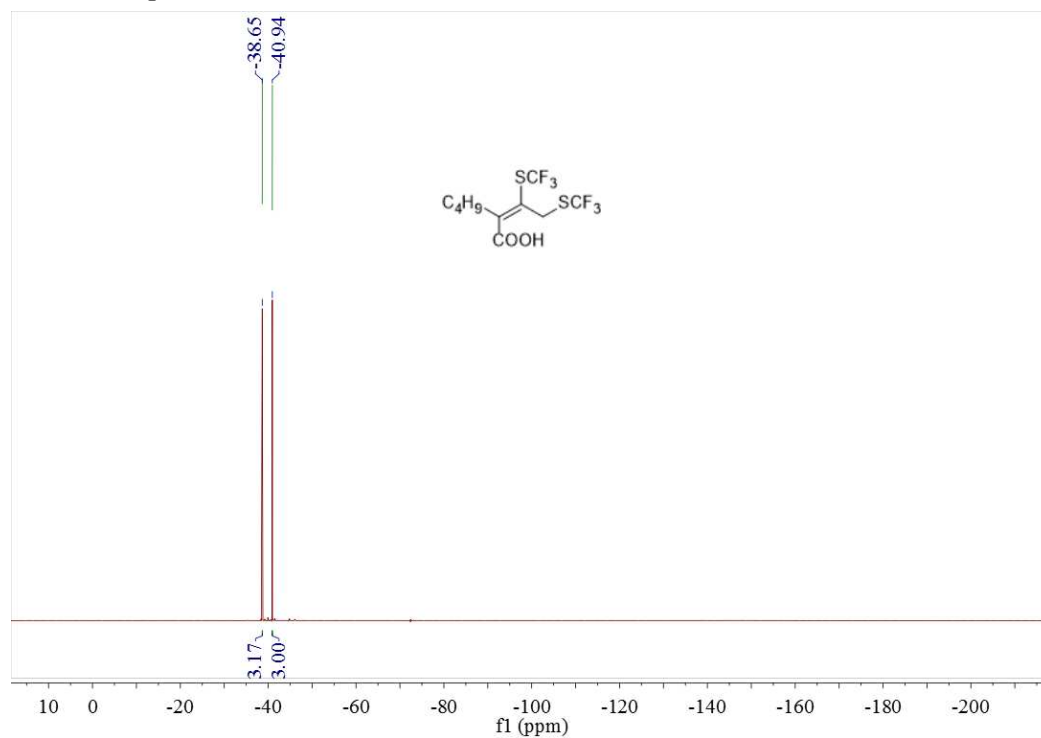

$^{13}\text{C}$  NMR spectrum of **4v** in  $\text{CDCl}_3$

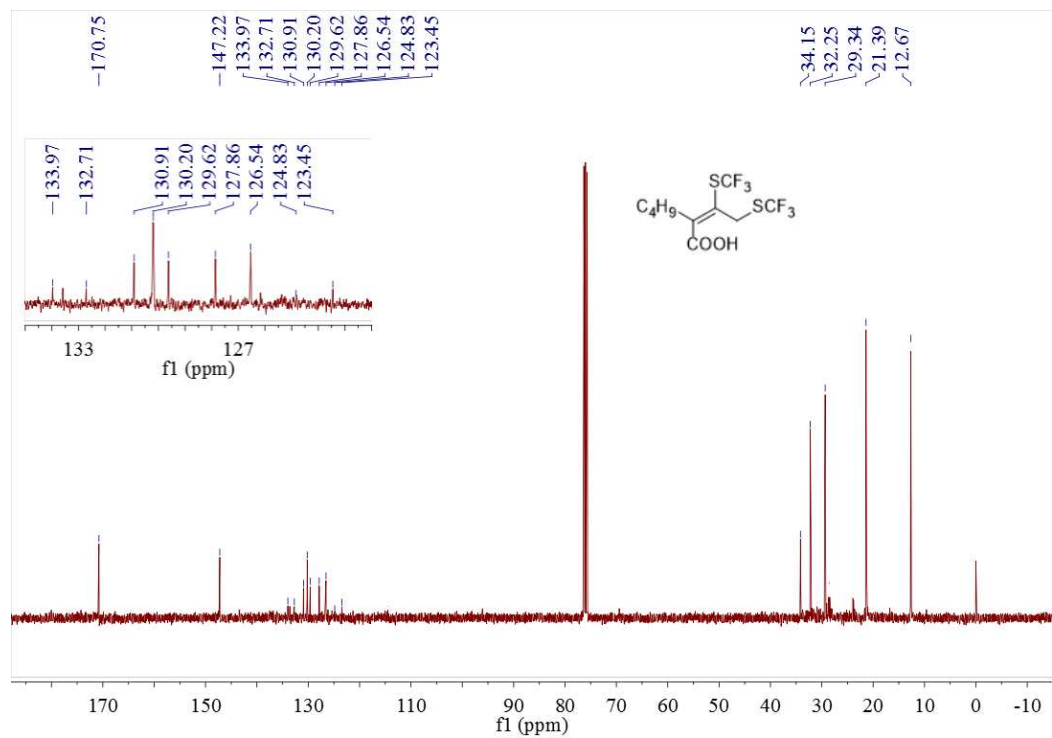

$^1\text{H}$  NMR spectrum of **4w** in  $\text{CDCl}_3$

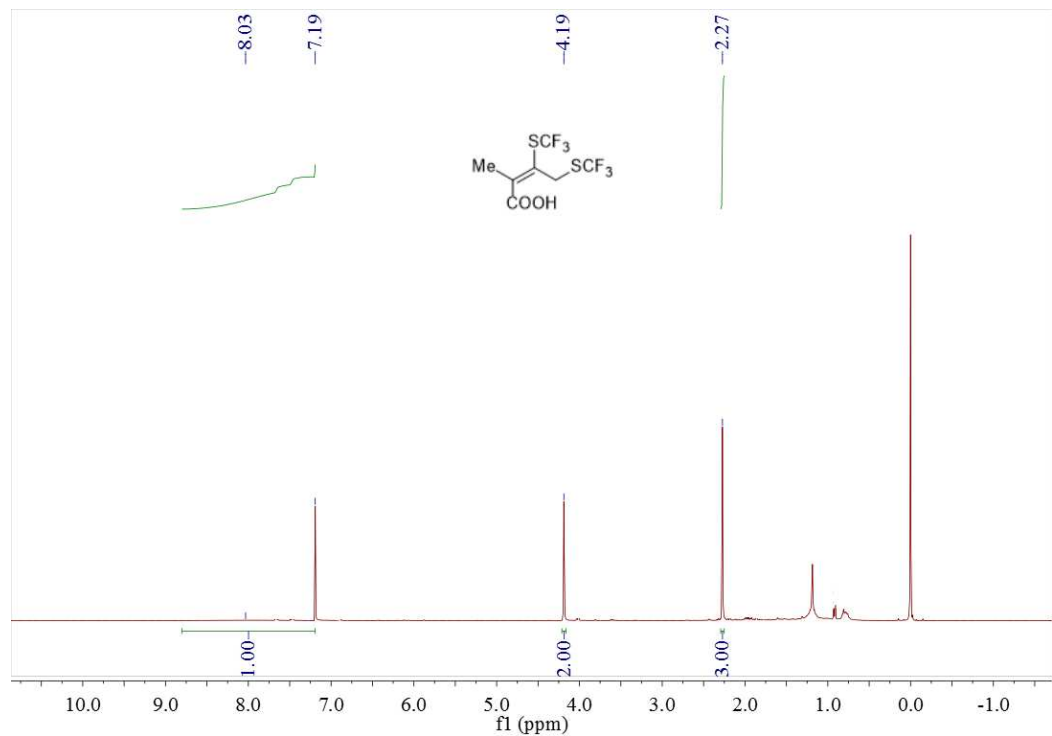

$^{19}\text{F}$  NMR spectrum of **4w** in  $\text{CDCl}_3$

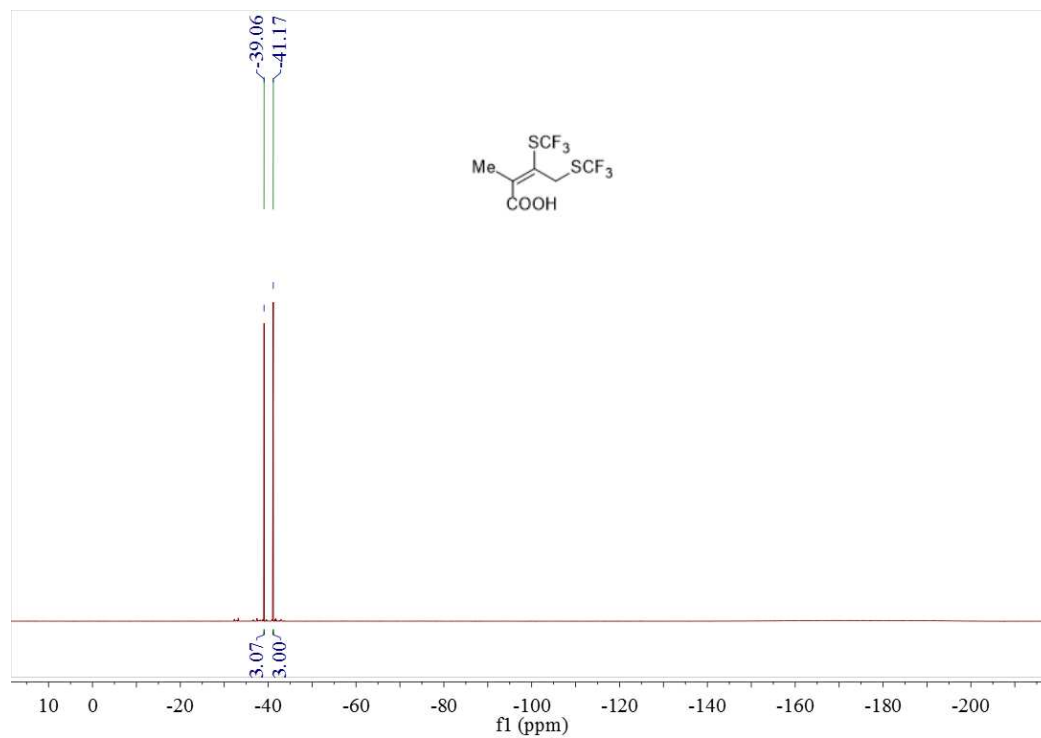

$^{13}\text{C}$  NMR spectrum of **4w** in  $\text{CDCl}_3$

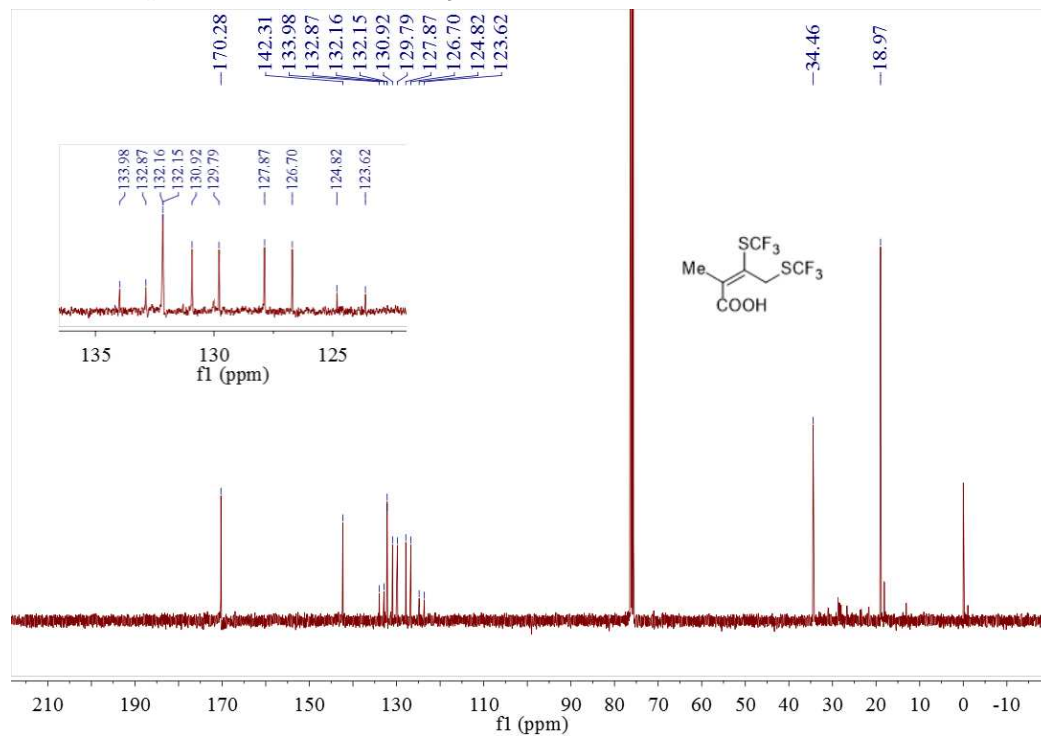

$^1\text{H}$  NMR spectrum of **5a** in  $\text{CDCl}_3$

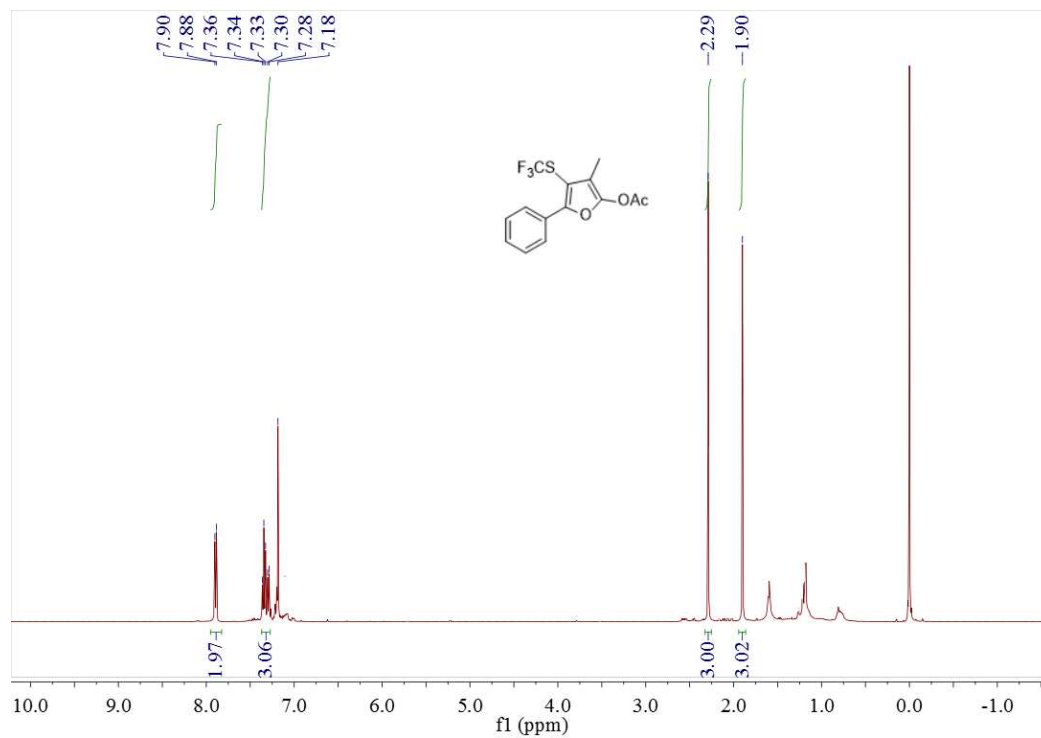

$^{19}\text{F}$  NMR spectrum of **5a** in  $\text{CDCl}_3$

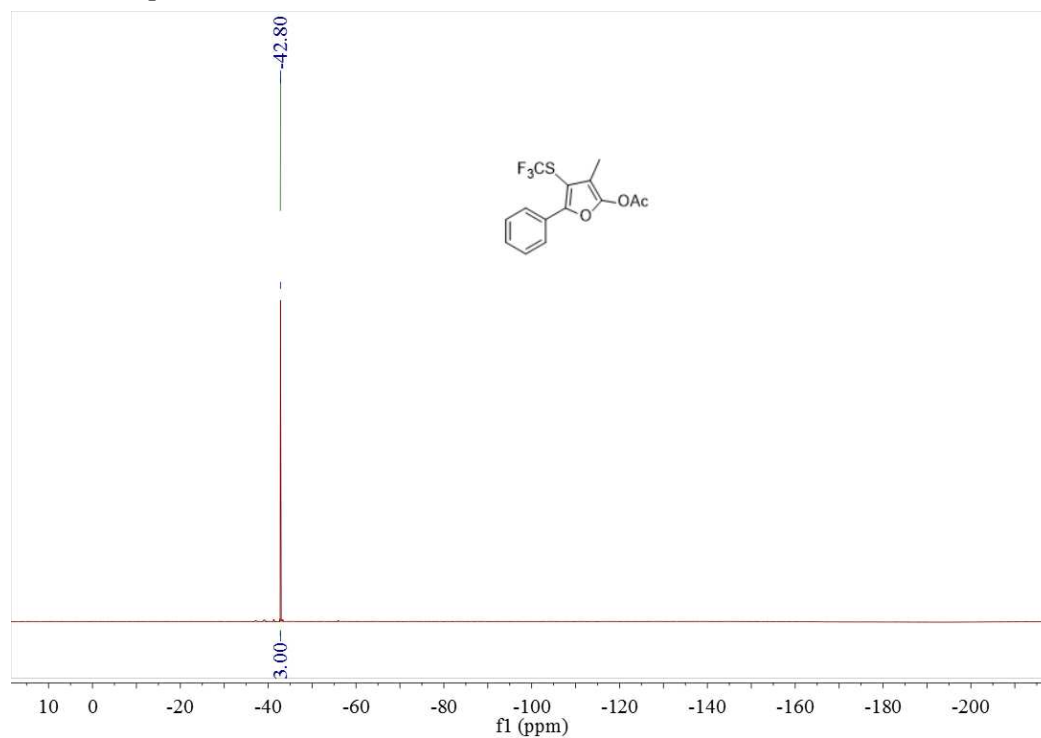



$^{13}\text{C}$  NMR spectrum of **5a** in  $\text{CDCl}_3$

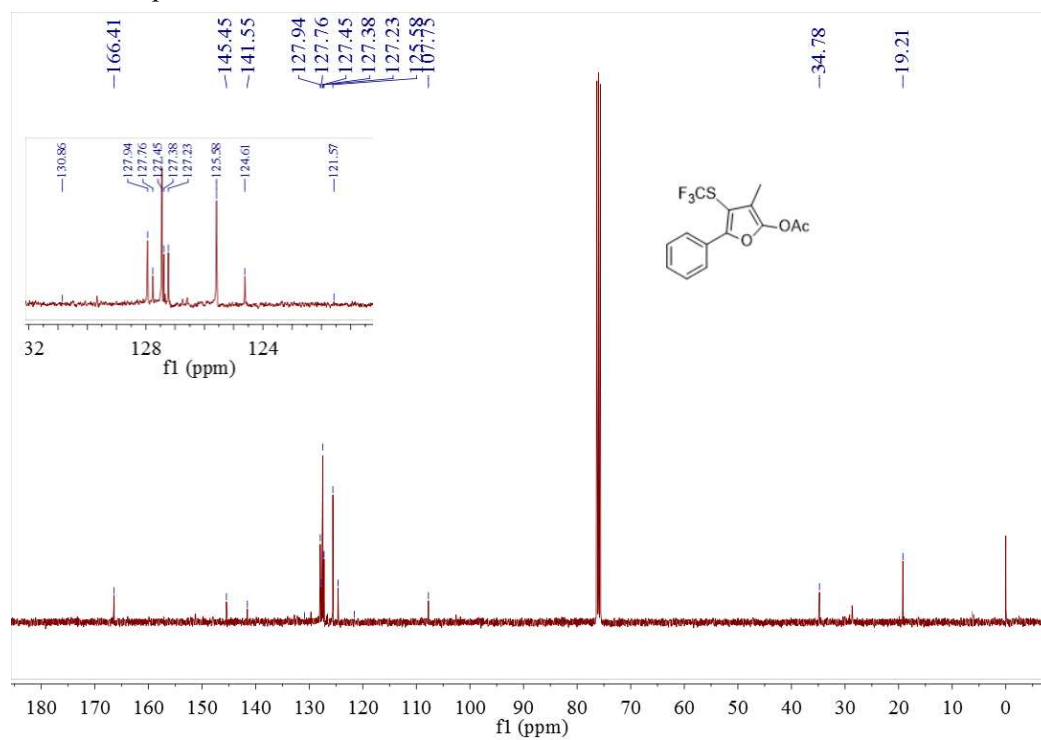

$^1\text{H}$  NMR spectrum of **6a** in  $\text{CDCl}_3$

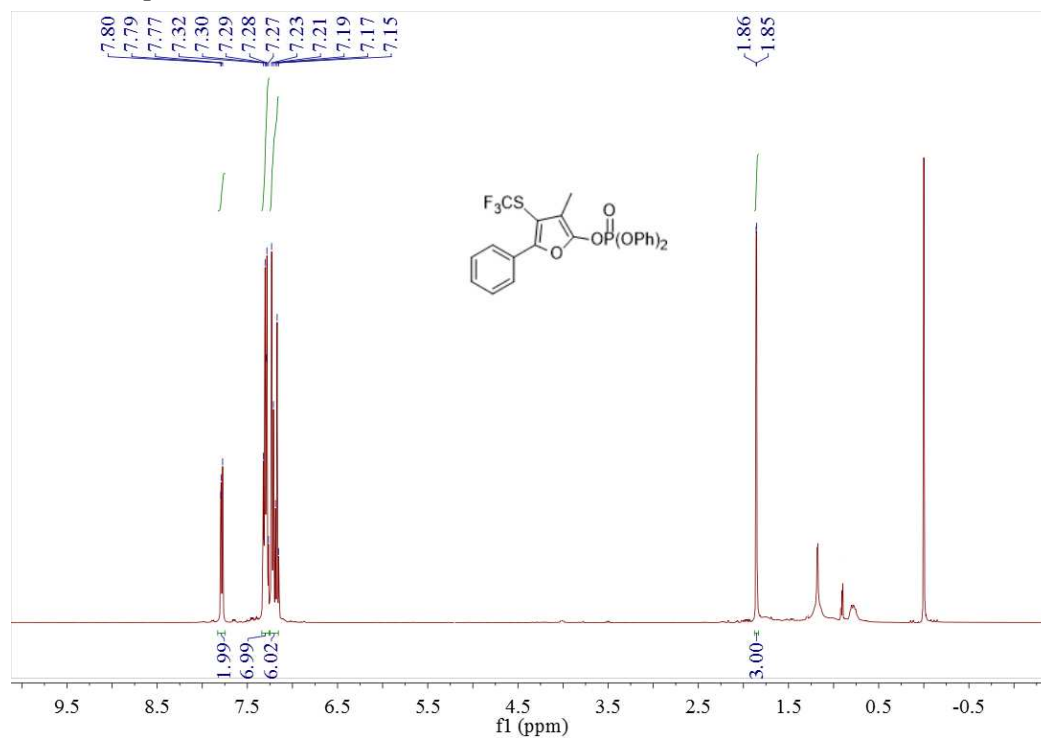

$^{19}\text{F}$  NMR spectrum of **6a** in  $\text{CDCl}_3$

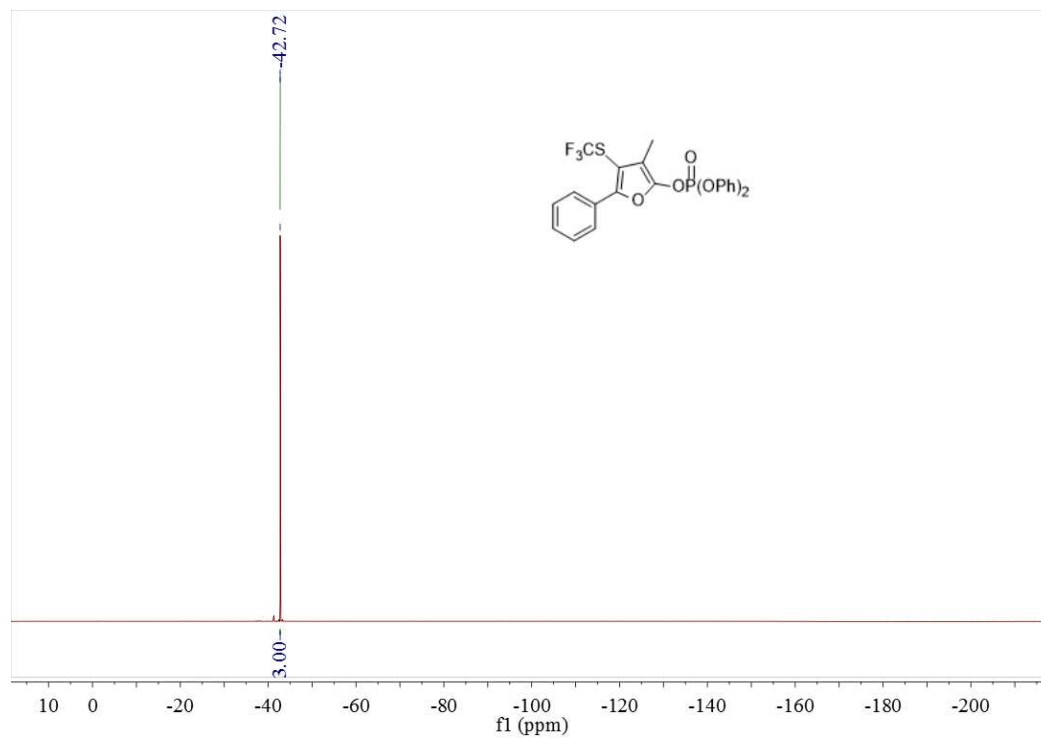

$^{13}\text{C}$  NMR spectrum of **6a** in  $\text{CDCl}_3$

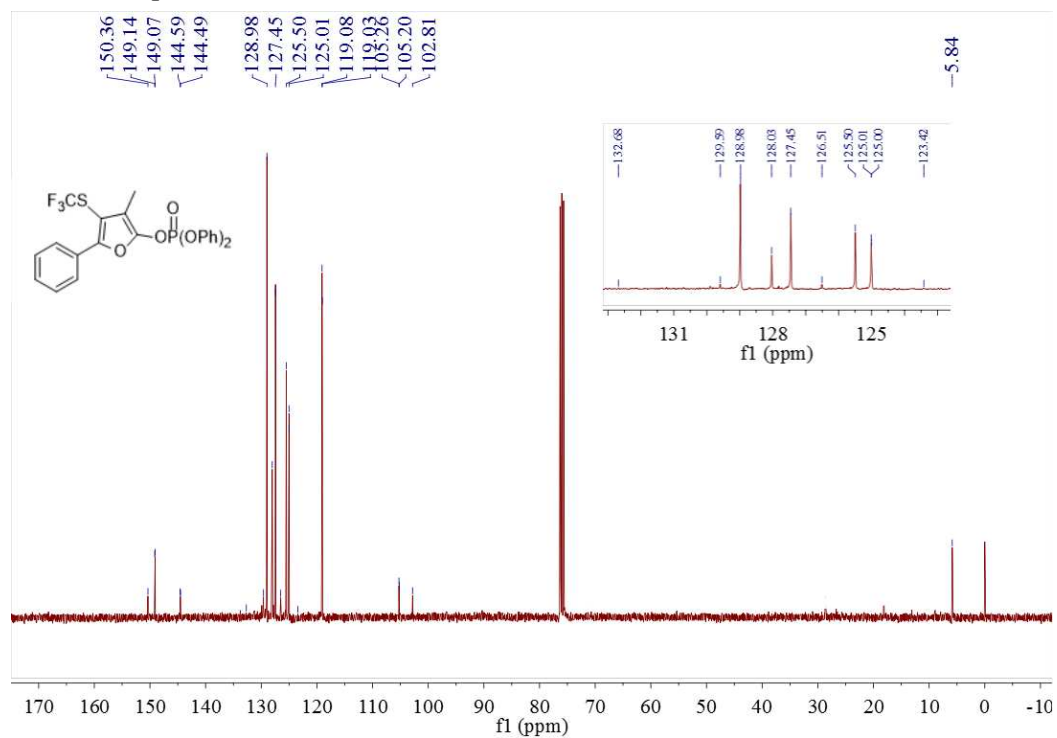

## 9. ORTEP Drawing of the X-Ray Crystallographic Structure of 3f

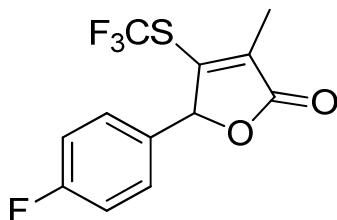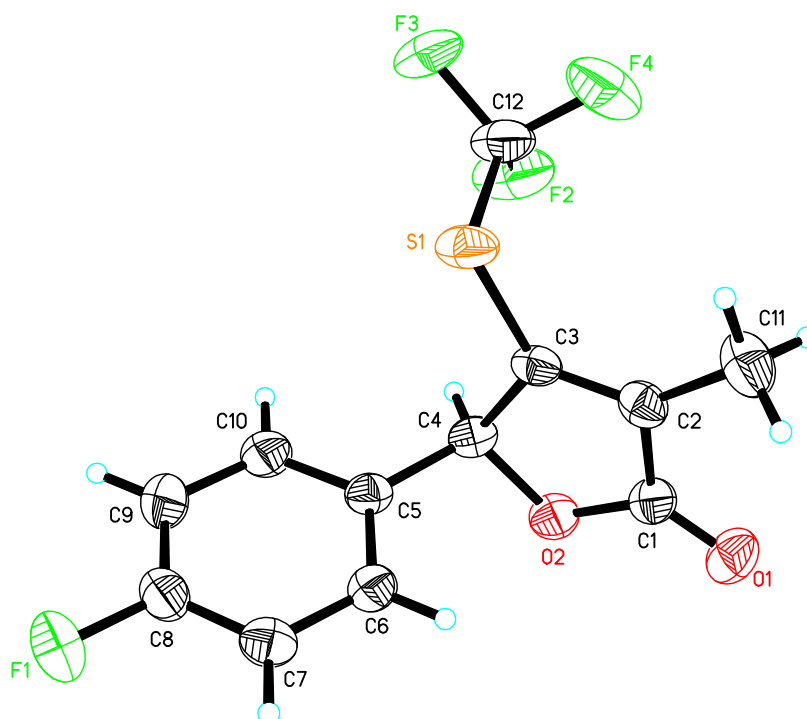

CCDC 1559240 contains the supplementary crystallographic data for the target compound **3f**. This data can be obtained free of charge from the Cambridge Crystallographic Data Centre via [www.ccdc.cam.ac.uk/data\\_request/cif](http://www.ccdc.cam.ac.uk/data_request/cif).
